# Supplementary material for: The isolated effect of age on the risk of COVID-19 severe outcomes: a systematic review with meta-analysis
Source: PubMed Central journal article supplement — BMJ Glob Health. 2021 Dec 16;6(12):e006434. doi: 10.1136/bmjgh-2021-006434 (PMC8678541; doi:10.1136/bmjgh-2021-006434), 2021-12-16
Supplement: bmjgh-2021-006434supp001.pdf [file bmjgh-2021-006434supp001.pdf]

**Search strategy of Umbrella Review**

## Search Syntax PubMed 1:

("Severe Acute Respiratory Syndrome Coronavirus 2" [Supplementary Concept] OR "COVID-19" [Supplementary Concept] OR "covid 19 diagnostic testing" [Supplementary Concept] OR "covid 19 drug treatment" [Supplementary Concept] OR "covid 19 serotherapy"[Supplementary Concept] OR "covid 19 vaccine" [Supplementary Concept] OR "Severe Acute Respiratory Syndrome Coronavirus 2"[tiab] OR ncov\*[tiab] OR covid\*[tiab] OR sars-cov-2[tiab] OR "sars cov 2"[tiab] OR "SARS Coronavirus 2"[tiab] OR "Severe Acute Respiratory Syndrome CoV 2"[tiab] OR "Wuhan coronavirus"[tiab] OR "Wuhan seafood market pneumonia virus"[tiab] OR "SARS2"[tiab] OR "2019-nCoV"[tiab] OR "hcov-19"[tiab] OR „novel 2019 coronavirus“[tiab] OR "2019 novel coronavirus\*"[tiab] OR „novel coronavirus 2019\*“[tiab] OR "2019 novel human coronavirus\*"[tiab] OR „human coronavirus 2019“[tiab] OR "coronavirus disease-19"[tiab] OR "corona virus disease-19"[tiab] OR "coronavirus disease 2019"[tiab] OR "corona virus disease 2019"[tiab] OR "2019 coronavirus disease"[tiab] OR "2019 corona virus disease"[tiab] OR „novel coronavirus disease 2019“[tiab] OR „novel coronavirus infection 2019“[tiab] OR "new coronavirus\*"[tiab] OR "coronavirus outbreak"[tiab] OR "coronavirus epidemic"[tiab] OR "coronavirus pandemic"[tiab] OR "pandemic of coronavirus"[tiab]) AND ("2019/12/01"[PDAT] : "2099/12/31"[PDAT])

## Search Syntax PubMed 2:

("wuhan"[tiab] or china[tiab] or hubei[tiab]) AND ("Severe Acute Respiratory Syndrome Coronavirus 2"[Supplementary Concept] OR "COVID-19" [Supplementary Concept] OR "covid 19 diagnostic testing"[Supplementary Concept] OR "covid 19 drug treatment"[Supplementary Concept] OR "covid 19 serotherapy"[Supplementary Concept] OR "covid 19 vaccine"[Supplementary Concept] OR "coronavirus\*"[tiab] OR "corona virus\*"[tiab] OR ncov[tiab] OR covid\*[tiab] OR sars\*[tiab])

## Search Syntax Embase 1:

('severe acute respiratory syndrome coronavirus 2':ti,ab OR 'severe acute respiratory syndrome coronavirus 2'/exp OR 'covid 19'/exp OR ncov\*:ti,ab OR covid\*:ti,ab OR 'sars cov 2':ti,ab OR 'sars-cov-2':ti,ab OR 'sars coronavirus 2':ti,ab OR 'sars coronavirus 2'/exp OR 'severe acute respiratory syndrome cov 2':ti,ab OR 'wuhan coronavirus':ti,ab OR 'wuhan seafood market pneumonia virus':ti,ab OR sars2:ti,ab OR '2019-ncov':ti,ab OR 'hcov-19':ti,ab OR 'novel 2019 coronavirus':ti,ab OR '2019 novel coronavirus\*':ti,ab OR 'novel coronavirus 2019'/exp OR '2019 novel human coronavirus\*':ti,ab OR 'human coronavirus 2019':ti,ab OR 'coronavirus disease-19':ti,ab OR 'corona virus disease-19':ti,ab OR 'coronavirus disease 2019':ti,ab OR 'coronavirus disease 2019'/exp OR 'corona virus disease 2019':ti,ab OR '2019 coronavirus disease':ti,ab OR 'novel coronavirus 2019\*':ti,ab OR 'novel coronavirus disease 2019':ti,ab OR 'novel coronavirus infection 2019':ti,ab OR '2019 corona virus disease':ti,ab OR 'new coronavirus\*':ti,ab OR 'coronavirus outbreak':ti,ab OR 'coronavirus epidemic':ti,ab OR 'coronavirus pandemic':ti,ab OR 'pandemic of coronavirus':ti,ab OR 'severe acute respiratory syndrome coronavirus 2 vaccine'/exp OR 'covid 19 vaccine'/exp) AND 2020:py

## Search Syntax Embase 2:

(wuhan:ti,ab OR china:ti,ab OR hubei:ti,ab) AND ('severe acute respiratory syndrome coronavirus 2':ti,ab OR 'severe acute respiratory syndrome coronavirus 2'/exp OR 'severe acute respiratory

syndrome coronavirus 2' OR 'covid\*':ti,ab OR 'covid 19'/exp OR 'covid 19' OR coronavirus\*':ti,ab OR 'corona virus\*':ti,ab OR ncov:ti,ab OR covid\*':ti,ab OR sars\*':ti,ab OR 'sars coronavirus 2'/exp)

These search terms were combined with “systematic review OR meta-analysis”[all fields] to identify eligible systematic reviews.

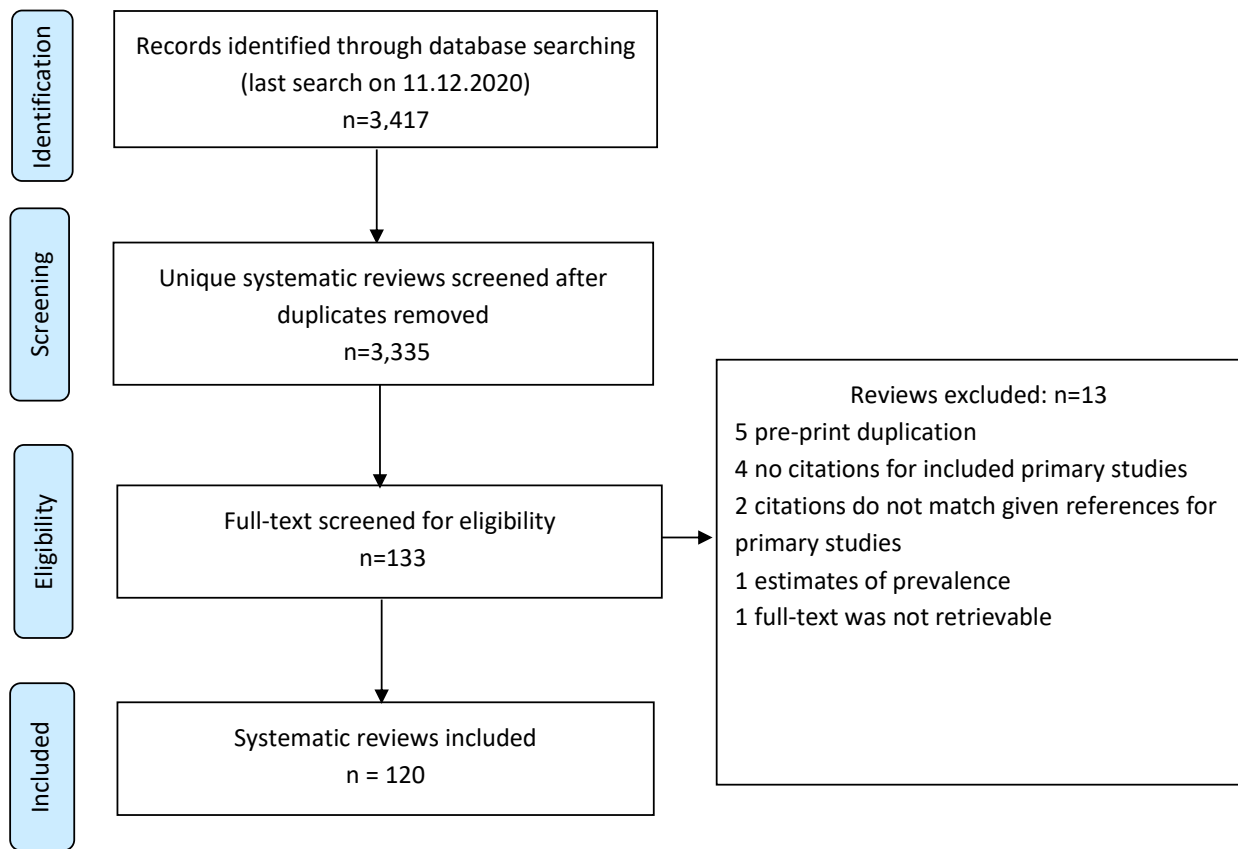

Figure S1. Selection of systematic reviews of Umbrella Review (Treskova et al. 2021)

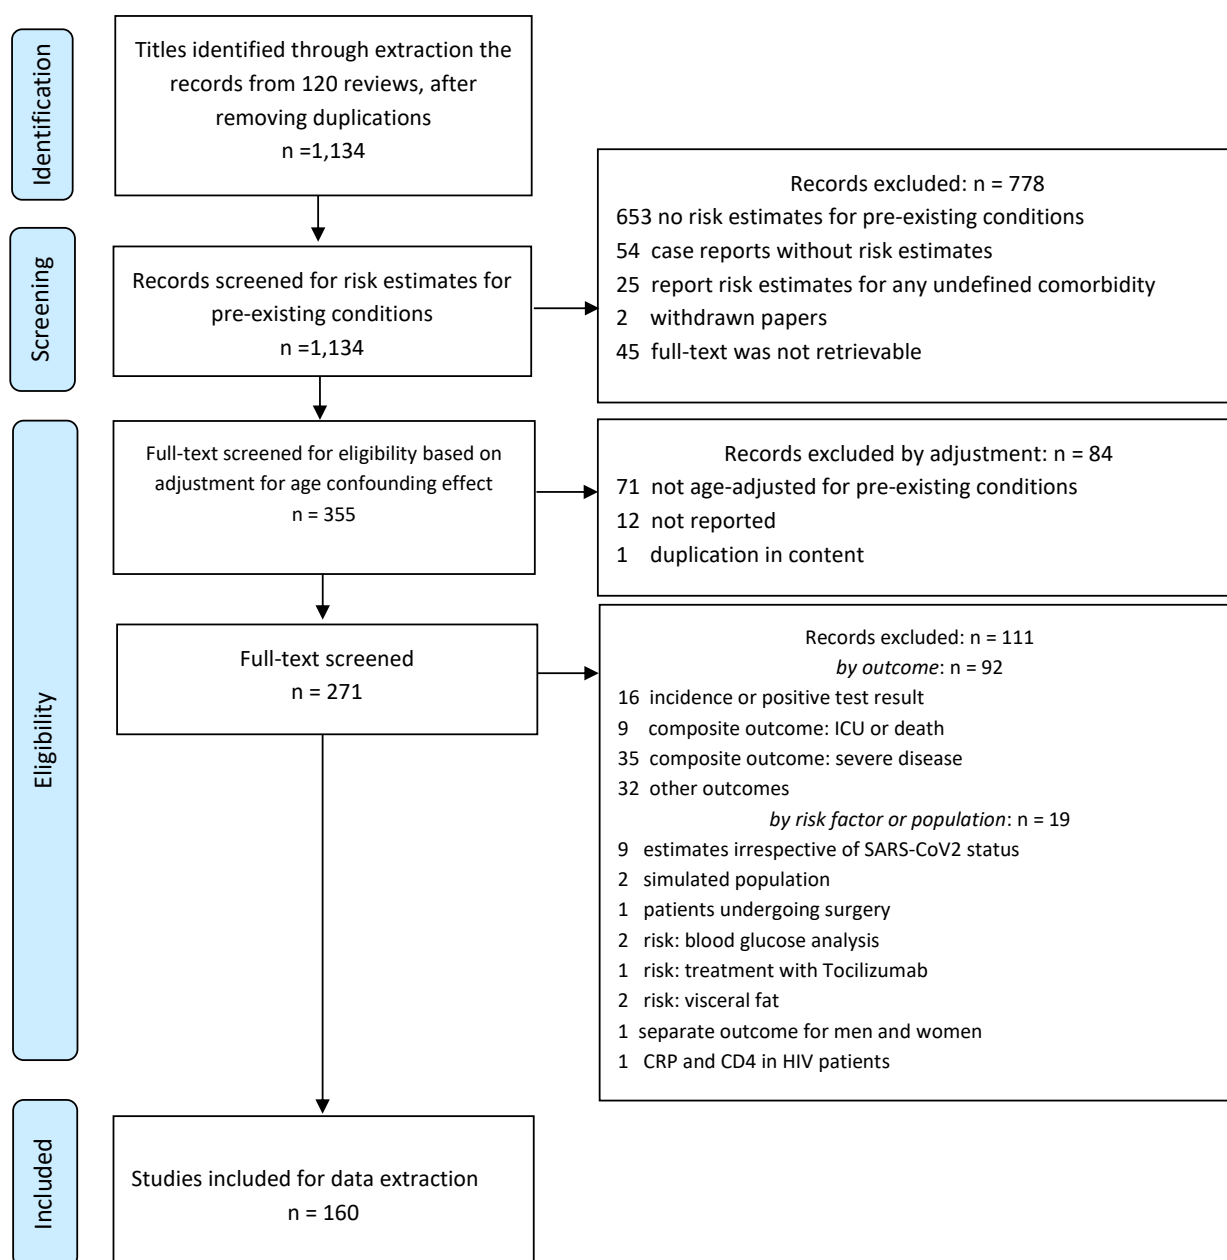

**Figure S2. Selection of primary studies in umbrella review (Treskova et al. 2021)**

## Risk of Bias Instrument and Explanation

| Major risk of bias domains                                                                                                                                                                                                                                                                                                                                                                                                                                                                                                                                                                                                                                                                                                                                                                                                                                                                                                                                                                                                                                                                                                                           | Risk    | Criteria                                                                                                                                                                                                                                                                                                                                                                                                                                                                                                                                                                                                                                                                                                                                                                                                                                                                                                                                                                                                                                               | Hints/ notes |
|------------------------------------------------------------------------------------------------------------------------------------------------------------------------------------------------------------------------------------------------------------------------------------------------------------------------------------------------------------------------------------------------------------------------------------------------------------------------------------------------------------------------------------------------------------------------------------------------------------------------------------------------------------------------------------------------------------------------------------------------------------------------------------------------------------------------------------------------------------------------------------------------------------------------------------------------------------------------------------------------------------------------------------------------------------------------------------------------------------------------------------------------------|---------|--------------------------------------------------------------------------------------------------------------------------------------------------------------------------------------------------------------------------------------------------------------------------------------------------------------------------------------------------------------------------------------------------------------------------------------------------------------------------------------------------------------------------------------------------------------------------------------------------------------------------------------------------------------------------------------------------------------------------------------------------------------------------------------------------------------------------------------------------------------------------------------------------------------------------------------------------------------------------------------------------------------------------------------------------------|--------------|
| <b>1. Recruitment procedure and follow-up (in cohort studies) For ecological studies or other analytical studies†</b><br><br><i>HINT: We are looking for selection bias:</i><br><br><i>Examples of possible selection bias:</i> <ul style="list-style-type: none"> <li>• If positive COVID-19 participants are recruited, positivity tested by clinical evaluation, such as typical symptoms. Ideally, participants were tested with RT-PCR laboratory tests to have a low risk of bias.</li> </ul> <i>Examples of baseline difference:</i> <ul style="list-style-type: none"> <li>• Protocols for recruitment or inclusion/exclusion criteria were applied differently across study groups</li> <li>• Study participants/populations were recruited at different times</li> <li>• Study participants/populations were recruited at different times</li> <li>• Study participants were recruited from different populations and proportions of participants from each population in each study group are not uniform (consider study base principle)</li> <li>• Participation rates were inadequate or not comparable across study groups</li> </ul> | low     | <input type="checkbox"/> There were no baseline differences among study groups or adjustment techniques were used to correct for the differences, OR there is insufficient information about participant selection, but there is indirect evidence that suggests that participant recruitment and inclusion/exclusion criteria was consistent, as described by the criteria for a judgment of low risk of bias.<br><input type="checkbox"/> For cohort studies: Loss to follow-up is below 20% in total and not different between the two groups (up to 10% difference). *                                                                                                                                                                                                                                                                                                                                                                                                                                                                             |              |
|                                                                                                                                                                                                                                                                                                                                                                                                                                                                                                                                                                                                                                                                                                                                                                                                                                                                                                                                                                                                                                                                                                                                                      | high    | There were baseline differences among study groups and no adjustment was used to correct for differences, such as (select all that apply): <ul style="list-style-type: none"> <li><input type="checkbox"/> Protocols for recruitment or inclusion/exclusion criteria were applied differently across study groups.</li> <li><input type="checkbox"/> Study participants/populations were recruited at different times.</li> <li><input type="checkbox"/> Study participants were recruited from different populations and proportions of participants from each population in each study group are not uniform (study base principle not considered).</li> <li><input type="checkbox"/> Participation rates were inadequate or not comparable across study groups.</li> <li><input type="checkbox"/> For cohort studies: total loss to follow-up is larger than acceptable (20% or more)* OR drop out differs between the groups by more than 10%* OR the reasons for drop out considerably differ between exposed and non-exposed groups.*</li> </ul> |              |
|                                                                                                                                                                                                                                                                                                                                                                                                                                                                                                                                                                                                                                                                                                                                                                                                                                                                                                                                                                                                                                                                                                                                                      | unclear | <input type="checkbox"/> There is insufficient information about participant selection to permit a judgment.                                                                                                                                                                                                                                                                                                                                                                                                                                                                                                                                                                                                                                                                                                                                                                                                                                                                                                                                           |              |

| Major risk of bias domains                                                                                                         | Risk    | Criteria                                                                                                                                                                                                                                                                                                                                                                | Hints/ notes              |
|------------------------------------------------------------------------------------------------------------------------------------|---------|-------------------------------------------------------------------------------------------------------------------------------------------------------------------------------------------------------------------------------------------------------------------------------------------------------------------------------------------------------------------------|---------------------------|
| <b>2. Exposure definition and measurement</b>                                                                                      | low     | <input type="checkbox"/> There is high confidence in the accuracy of the exposure assessment <sup>#</sup> or less established/ less direct exposure measurements are validated against well-established of direct methods <sup>†</sup> AND<br><input type="checkbox"/> Exposure measured per year or by 5- or 10-year categories.                                       |                           |
|                                                                                                                                    | high    | <input type="checkbox"/> Exposure was not accurately measured. <sup>#</sup><br><input type="checkbox"/> Less established or less direct exposure measurements are not validated and are suspected to introduce bias, which may affect the outcome assessment. <sup>†</sup><br><input type="checkbox"/> Exposure used “large/rough” categories (i.e., ≥60 vs. <60 years) |                           |
|                                                                                                                                    | unclear | <input type="checkbox"/> Not reported.                                                                                                                                                                                                                                                                                                                                  |                           |
| <b>3. Outcome “hospitalization, ICU admission, mechanical ventilation, case mortality, deaths/mortality” Source and validation</b> | low     | <input type="checkbox"/> Outcome was objectively ascertained to minimize bias through objective sources (hospital/medical records). <sup>#</sup><br><input type="checkbox"/> Measurement methods were similar in the different groups. <sup>#</sup>                                                                                                                     |                           |
|                                                                                                                                    | high    | <input type="checkbox"/> Outcome was not objectively ascertained. <sup>#</sup><br><input type="checkbox"/> Measurement methods were different in the groups. <sup>#</sup>                                                                                                                                                                                               |                           |
|                                                                                                                                    | unclear | <input type="checkbox"/> Not reported.                                                                                                                                                                                                                                                                                                                                  |                           |
| <b>4. Confounding</b>                                                                                                              | low     | <input type="checkbox"/> Major age-related risk factors were assessed and accounted for (diabetes, cardiovascular disease, immunosuppression, kidney disease, liver disease, chronic pulmonary disease).                                                                                                                                                                | Confounders not assessed: |
|                                                                                                                                    | high    | <input type="checkbox"/> Major age-related risk factors were not assessed nor were they accounted for.                                                                                                                                                                                                                                                                  |                           |
|                                                                                                                                    | unclear | <input type="checkbox"/> Not reported.                                                                                                                                                                                                                                                                                                                                  |                           |
| <b>5. Analysis method: methods to reduce research specific bias</b>                                                                | low     | <input type="checkbox"/> Authors used adequate statistical models to reduce bias (e.g., standardization, adjustment in multivariate model, propensity scoring).                                                                                                                                                                                                         |                           |
|                                                                                                                                    | high    | <input type="checkbox"/> Authors did not use adequate statistical models to reduce bias.                                                                                                                                                                                                                                                                                |                           |
|                                                                                                                                    | unclear | <input type="checkbox"/> Not reported.                                                                                                                                                                                                                                                                                                                                  |                           |
| Minor risk of bias domains*                                                                                                        | Risk    | Criteria                                                                                                                                                                                                                                                                                                                                                                | Hints/ notes              |
| <b>6. Chronology</b>                                                                                                               | low     | <input type="checkbox"/> Temporal relation may be established (age-related risk factors precede the outcome).                                                                                                                                                                                                                                                           |                           |

| Minor risk of bias domains*    | Risk    | Criteria                                                                                                                                                    | Hints/ notes    |
|--------------------------------|---------|-------------------------------------------------------------------------------------------------------------------------------------------------------------|-----------------|
|                                | high    | <input type="checkbox"/> Temporal relation cannot be established. (laboratory values or other covariates reflecting disease severity are used in model)     | Please specify: |
|                                | unclear | <input type="checkbox"/> Not reported.                                                                                                                      |                 |
| <b>7. Funding</b>              | low     | <input type="checkbox"/> Grant/ non-profit-organizations*<br><input type="checkbox"/> Study was clearly not affected by sponsors. *                         |                 |
|                                | high    | <input type="checkbox"/> Sponsoring organization participated in data analysis.<br><input type="checkbox"/> Study was probably affected by sponsors.        |                 |
|                                | unclear | <input type="checkbox"/> Industry, combined industry+grant*, unclear if study was affected by sponsors.<br><input type="checkbox"/> Not reported.           |                 |
| <b>8. Conflict of interest</b> | low     | <input type="checkbox"/> Reported not having conflict of interest or clear from report/communication that study was not affected by author(s) affiliation.* |                 |
|                                | high    | <input type="checkbox"/> Conflict of interest exists (at least one author).*                                                                                |                 |
|                                | unclear | <input type="checkbox"/> Not reported.                                                                                                                      |                 |

| <b>Overall risk of bias assessment:</b><br>General rule for rating domains: if at least one box in domain is marked for "high risk", the domain is high risk. |                                                              | Low Risk                   | High Risk | Unclear Risk |
|---------------------------------------------------------------------------------------------------------------------------------------------------------------|--------------------------------------------------------------|----------------------------|-----------|--------------|
| Major domains                                                                                                                                                 | 1. Recruitment procedure and follow-up (in cohort studies)   |                            |           |              |
|                                                                                                                                                               | 2. Exposure assessment                                       |                            |           |              |
|                                                                                                                                                               | 3. Outcome source and validation                             |                            |           |              |
|                                                                                                                                                               | 4. Confounding                                               |                            |           |              |
|                                                                                                                                                               | 5. Analysis method: methods to reduce research specific bias |                            |           |              |
| Minor domains                                                                                                                                                 | 6. Chronology                                                |                            |           |              |
|                                                                                                                                                               | 7. Funding                                                   |                            |           |              |
|                                                                                                                                                               | 8. Conflict of interest                                      |                            |           |              |
| <b>General rule for overall rating:</b><br>Low risk of bias: low risk in all major domains<br>High risk of bias: if not low risk                              |                                                              | <b>Overall assessment:</b> |           |              |

## **Description of Risk of Bias Domains (1-8)**

### **1. Recruitment procedure and follow-up**

A low-risk study should have minimized selection bias by ensuring that there were no baseline differences among the study groups, or if there were, adjustment techniques were used to correct for the difference. If there was indirect evidence suggesting that participant recruitment and that the inclusion and exclusion criteria were consistent, the domain was assessed as having a low risk of bias. In cohort studies, the loss to follow-up should have been less than 20% and this loss should not be different between the groups. If the studies recruited COVID-19 positive participants, preferably a real-time reverse transcription polymerase chain reaction (RT-PCR) test would have been used to test for COVID-19 positivity. If COVID-19 ascertainment methods were unreliable, such as relying on clinical symptoms, the domain was also considered as high risk. If there were baseline differences among the study groups, such as using different inclusion/exclusion criteria, inadequate participation rates or rates that were not comparable across the group, or if the study participants were recruited from different populations and the proportions of participants from each population in each study were not uniform, the domain was considered as high risk.

### **2. Exposure definition and measurement**

If age was accurately measured and finely categorized, such as in per year, or in five or ten-year categories, this domain was considered to have a low risk of bias. If age was measured in rough or large categories, greater than in 10-year categories or such as >60 years vs ≤60 years, the domain was considered as having a high risk of bias.

### **3. Outcome source and validation**

If the outcome was objectively measured to minimize bias, such as through hospital or medical records, and the assessment was similar for the comparison groups, this domain was assessed as having a low risk of bias.

### **4. Age-dependent risk factors**



In order for studies to be considered as having a low risk of bias, the following age-dependent factors should have been considered, based on the current evidence (7, 8): (1) diabetes, (2) cardiovascular disease, (3) immunosuppression/cancer, (4) chronic respiratory diseases, such as chronic obstructive pulmonary disease (COPD), (5) chronic kidney disease, and (6) chronic liver disease. Risk factors for COVID-19 disease severity with no or little age-dependency (such as sex, obesity, smoking) were not considered age-dependent risk factors.

## **5. Analysis methods**

If adequate statistical models were used to reduce bias and control for confounding, this domain was considered as having a low risk of bias.

## **6. Chronology**

If temporal relation may be established, especially considering that the age-related risk factors used in the model precede the outcome, this domain was assessed as having a low risk of bias. If there were covariates in the model reflecting disease severity (such as fever, lymphocyte counts, D-dimer level, etc,) the domain was considered as having high risk.

## **7. Funding**

Funding was assessed in two areas, namely the funding source and its involvement in the research. If a study was funded by non-profit organization(s) and it was not affected by sponsors, the domain was considered low risk. If the funding organization participated in the data analysis or the study was probably affected by the sponsors, the domain had a high risk of bias.

## **8. Conflict of interest**

If the authors reported no conflicts of interest, this domain was low risk. If one author had a conflict of interest, this domain was assessed as having a high risk of bias.

## **Overall Risk of Bias**

From the above domains, domains 1-5 were set as major domains, while domains 6-8 were minor domains. A study could obtain an overall low risk of bias if all major domains were assessed as having low risk of bias.

**Table S1. Excluded studies and reasons for exclusion**

| Reference (st: Stratification of age only (no adjustment in model); co: Comorbidities missing; p: Special population (i.e. cancer patients, patients with diabetes); a: Age effect estimate not provided; ag: age category unclear; o: Other)                                                                                                    | Reason for exclusion |    |   |   |    |   |
|--------------------------------------------------------------------------------------------------------------------------------------------------------------------------------------------------------------------------------------------------------------------------------------------------------------------------------------------------|----------------------|----|---|---|----|---|
|                                                                                                                                                                                                                                                                                                                                                  | st                   | co | p | a | ag | o |
| Al-Sabah, S., Al-Haddad, M., Al-Youha, S., Jamal, M., & Almazeedi, S. (2020). COVID-19: Impact of obesity and diabetes on disease severity. <i>Clinical Obesity</i> , 10(6), e12414.                                                                                                                                                             |                      | x  |   |   |    |   |
| Al-Salameh, A., Lanoix, J. P., Bennis, Y., Andrejak, C., Brochot, E., Deschasse, G., ... & Lalau, J. D. (2020). Characteristics and outcomes of COVID-19 in hospitalized patients with and without diabetes. <i>Diabetes/Metabolism Research and Reviews</i> , e3388.                                                                            |                      | x  |   |   |    |   |
| Amit, M., Sorkin, A., Chen, J., Cohen, B., Karol, D., Tsur, A. M., ... & Benov, A. (2020). Clinical course and outcomes of severe Covid-19: a national scale study. <i>Journal of clinical medicine</i> , 9(7), 2282.                                                                                                                            |                      | x  |   |   |    |   |
| Bellan, M., Patti, G., Hayden, E., Azzolina, D., Pirisi, M., Acquaviva, A., ... & Sainaghi, P. P. (2020). Fatality rate and predictors of mortality in an Italian cohort of hospitalized COVID-19 patients. <i>Scientific reports</i> , 10(1), 1-10.                                                                                             |                      | x  |   |   |    |   |
| Berenguer, J., Ryan, P., Rodríguez-Baño, J., Jarrín, I., Carratalà, J., Pachón, J., ... & Jofre, C. S. (2020). Characteristics and predictors of death among 4035 consecutively hospitalized patients with COVID-19 in Spain. <i>Clinical Microbiology and Infection</i> , 26(11), 1525-1536.                                                    |                      | x  |   |   |    |   |
| Bezzio, C., Saibeni, S., Variola, A., Allocca, M., Massari, A., Gerardi, V., ... & Fiorino, G. (2020). Outcomes of COVID-19 in 79 patients with IBD in Italy: an IG-IBD study. <i>Gut</i> , 69(7), 1213-1217.                                                                                                                                    |                      |    | x |   |    |   |
| Bianchetti, A., Rozzini, R., Guerini, F., Boffelli, S., Ranieri, P., Minelli, G., ... & Trabucchi, M. (2020). Clinical presentation of COVID19 in dementia patients. <i>The journal of nutrition, health &amp; aging</i> , 24, 560-562.                                                                                                          |                      | x  |   |   |    |   |
| Borghesi, A., Zigliani, A., Golemi, S., Carapella, N., Maculotti, P., Farina, D., & Maroldi, R. (2020). Chest X-ray severity index as a predictor of in-hospital mortality in coronavirus disease 2019: A study of 302 patients from Italy. <i>International Journal of Infectious Diseases</i> , 96, 291-293.                                   |                      | x  |   |   |    |   |
| Busetto, L., Bettini, S., Fabris, R., Serra, R., Dal Pra, C., Maffei, P., ... & Vettor, R. (2020). Obesity and COVID-19: an Italian snapshot. <i>Obesity</i> , 28(9), 1600-1605.                                                                                                                                                                 |                      | x  |   |   |    |   |
| Cariou, B., Hadjadj, S., Wargny, M., Pichelin, M., Al-Salameh, A., Allix, I., ... & Gourdy, P. (2020). Phenotypic characteristics and prognosis of inpatients with COVID-19 and diabetes: the CORONADO study. <i>Diabetologia</i> , 63(8), 1500-1515.                                                                                            |                      |    | x |   |    |   |
| Causy, C., Pattou, F., Wallet, F., Simon, C., Chalopin, S., Telliam, C., ... & Disse, E. (2020). Prevalence of obesity among adult inpatients with COVID-19 in France. <i>The Lancet Diabetes &amp; Endocrinology</i> , 8(7), 562-564.                                                                                                           |                      |    |   | x |    |   |
| Chen, F., Sun, W., Sun, S., Li, Z., Wang, Z., & Yu, L. (2020). Clinical characteristics and risk factors for mortality among inpatients with COVID-19 in Wuhan, China. <i>Clinical and translational medicine</i> .                                                                                                                              |                      | x  |   |   |    |   |
| Chen, R., Liang, W., Jiang, M., Guan, W., Zhan, C., Wang, T., ... & for COVID, M. T. E. G. (2020). Risk factors of fatal outcome in hospitalized subjects with coronavirus disease 2019 from a nationwide analysis in China. <i>Chest</i> , 158(1), 97-105.                                                                                      |                      | x  |   |   |    |   |
| Ciceri, F., Castagna, A., Rovere-Querini, P., De Cobelli, F., Ruggeri, A., Galli, L., ... & Zangrillo, A. (2020). Early predictors of clinical outcomes of COVID-19 outbreak in Milan, Italy. <i>Clinical Immunology</i> , 217, 108509.                                                                                                          |                      | x  |   |   |    |   |
| Crouse, A. B., Grimes, T., Li, P., Might, M., Ovale, F., & Shalev, A. (2021). Metformin use is associated with reduced mortality in a diverse population with COVID-19 and diabetes. <i>Frontiers in Endocrinology</i> , 11, 1081.                                                                                                               |                      | x  |   |   |    |   |
| D'Silva, K. M., Serling-Boyd, N., Wallwork, R., Hsu, T., Fu, X., Gravallesse, E. M., ... & Wallace, Z. S. (2020). Clinical characteristics and outcomes of patients with coronavirus disease 2019 (COVID-19) and rheumatic disease: a comparative cohort study from a US 'hot spot'. <i>Annals of the rheumatic diseases</i> , 79(9), 1156-1162. |                      |    |   | x |    |   |

| Reference (st: Stratification of age only (no adjustment in model); co: Comorbidities missing; p: Special population (i.e. cancer patients, patients with diabetes); a: Age effect estimate not provided; ag: age category unclear; o: Other)                                                                                                                                                    | Reason for exclusion |    |   |   |    |   |
|--------------------------------------------------------------------------------------------------------------------------------------------------------------------------------------------------------------------------------------------------------------------------------------------------------------------------------------------------------------------------------------------------|----------------------|----|---|---|----|---|
|                                                                                                                                                                                                                                                                                                                                                                                                  | st                   | co | p | a | ag | o |
| Dai, M., Liu, D., Liu, M., Zhou, F., Li, G., Chen, Z., ... & Cai, H. (2020). Patients with cancer appear more vulnerable to SARS-CoV-2: a multicenter study during the COVID-19 outbreak. <i>Cancer discovery</i> , 10(6), 783-791.                                                                                                                                                              |                      | x  |   |   |    |   |
| Denova-Gutiérrez, E., Lopez-Gatell, H., Alomia-Zegarra, J. L., López-Ridaura, R., Zaragoza-Jimenez, C. A., Dyer-Leal, D. D., ... & Barquera, S. (2020). The association of obesity, type 2 Diabetes, and hypertension with severe coronavirus disease 2019 on admission among Mexican patients. <i>Obesity</i> , 28(10), 1826-1832.                                                              |                      | x  |   |   |    |   |
| Du, R. H., Liang, L. R., Yang, C. Q., Wang, W., Cao, T. Z., Li, M., ... & Shi, H. Z. (2020). Predictors of mortality for patients with COVID-19 pneumonia caused by SARS-CoV-2: a prospective cohort study. <i>European Respiratory Journal</i> , 55(5).                                                                                                                                         |                      | x  |   |   |    |   |
| Escalera-Antezana, J. P., Lizon-Ferrufino, N. F., Maldonado-Alanoca, A., Alarcon-De-la-Vega, G., Alvarado-Arnez, L. E., Balderrama-Saavedra, M. A., ... & Rodriguez-Morales, A. J. (2020). Risk factors for mortality in patients with Coronavirus Disease 2019 (COVID-19) in Bolivia: An analysis of the first 107 confirmed cases. <i>Infez Med</i> , 28(2), 238-242.                          |                      | x  |   |   |    |   |
| Galloway, J. B., Norton, S., Barker, R. D., Brookes, A., Carey, I., Clarke, B. D., ... & Cattle, F. (2020). A clinical risk score to identify patients with COVID-19 at high risk of critical care admission or death: an observational cohort study. <i>Journal of Infection</i> , 81(2), 282-288.                                                                                              | x                    |    |   |   |    |   |
| Gao, C., Cai, Y., Zhang, K., Zhou, L., Zhang, Y., Zhang, X., ... & Li, F. (2020). Association of hypertension and antihypertensive treatment with COVID-19 mortality: a retrospective observational study. <i>European heart journal</i> , 41(22), 2058-2066.                                                                                                                                    |                      | x  |   |   |    |   |
| Garassino, M. C., Whisenant, J. G., Huang, L. C., Trama, A., Torri, V., Agustoni, F., ... & Horn, L. (2020). COVID-19 in patients with thoracic malignancies (TERAVOLT): first results of an international, registry-based, cohort study. <i>The Lancet Oncology</i> , 21(7), 914-922.                                                                                                           |                      | x  |   |   |    |   |
| Garcia, P. D. W., Fumeaux, T., Guerci, P., Heuberger, D. M., Montomoli, J., Roche-Campo, F., ... & RISC-19-ICU Investigators. (2020). Prognostic factors associated with mortality risk and disease progression in 639 critically ill patients with COVID-19 in Europe: Initial report of the international RISC-19-ICU prospective observational cohort. <i>EClinicalMedicine</i> , 25, 100449. | x                    |    |   |   |    |   |
| Gayam, V., Chobufo, M. D., Merghani, M. A., Lamichhane, S., Garlapati, P. R., & Adler, M. K. (2021). Clinical characteristics and predictors of mortality in African-Americans with COVID-19 from an inner-city community teaching hospital in New York. <i>Journal of medical virology</i> , 93(2), 812-819.                                                                                    |                      | x  |   |   |    |   |
| Geretti, A. M., Stockdale, A. J., Kelly, S. H., Cevik, M., Collins, S., Waters, L., ... & Semple, M. G. (2020). Outcomes of COVID-19 related hospitalization among people with HIV in the ISARIC WHO Clinical Characterization Protocol (UK): a prospective observational study. <i>Clinical Infectious Diseases</i> .                                                                           |                      |    | x |   |    |   |
| Goicoechea, M., Cámara, L. A. S., Macías, N., de Morales, A. M., Rojas, Á. G., Bascañana, A., ... & Aragoncillo, I. (2020). COVID-19: clinical course and outcomes of 36 hemodialysis patients in Spain. <i>Kidney international</i> , 98(1), 27-34.                                                                                                                                             |                      | x  |   |   |    |   |
| Goyal, P., Ringel, J. B., Rajan, M., Choi, J. J., Pinheiro, L. C., Li, H. A., ... & Safford, M. M. (2020). Obesity and COVID-19 in New York City: a retrospective cohort study. <i>Annals of Internal Medicine</i> , 173(10), 855-858.                                                                                                                                                           |                      |    |   | x |    |   |
| Halasz, G., Leoni, M. L., Villani, G. Q., Nolli, M., & Villani, M. (2020). Obesity, overweight and survival in critically ill patients with SARS-CoV-2 pneumonia: is there an obesity paradox? Preliminary results from Italy. <i>European Journal of Preventive Cardiology</i> , 2047487320939675.                                                                                              |                      |    |   | x |    |   |
| Harmouch, F., Shah, K., Hippen, J. T., Kumar, A., & Goel, H. (2021). Is it all in the heart? Myocardial injury as major predictor of mortality among hospitalized COVID-19 patients. <i>Journal of medical virology</i> , 93(2), 973-982.                                                                                                                                                        |                      | x  |   |   |    |   |
| Huang, S., Wang, J., Liu, F., Liu, J., Cao, G., Yang, C., ... & Xiong, B. (2020). COVID-19 patients with hypertension have more severe disease: a multicenter retrospective observational study. <i>Hypertension Research</i> , 43(8), 824-831.                                                                                                                                                  |                      | x  |   |   |    |   |

| Reference (st: Stratification of age only (no adjustment in model); co: Comorbidities missing; p: Special population (i.e. cancer patients, patients with diabetes); a: Age effect estimate not provided; ag: age category unclear; o: Other)                                                                     | Reason for exclusion |    |   |   |    |   |
|-------------------------------------------------------------------------------------------------------------------------------------------------------------------------------------------------------------------------------------------------------------------------------------------------------------------|----------------------|----|---|---|----|---|
|                                                                                                                                                                                                                                                                                                                   | st                   | co | p | a | ag | o |
| Hur, K., Price, C. P., Gray, E. L., Gulati, R. K., Maksimoski, M., Racette, S. D., ... & Khanwalkar, A. R. (2020). <? covid19?> Factors Associated With Intubation and Prolonged Intubation in Hospitalized Patients With COVID-19. <i>Otolaryngology–Head and Neck Surgery</i> , 163(1), 170-178.                |                      | x  |   |   |    |   |
| Kim, M. K., Jeon, J. H., Kim, S. W., Moon, J. S., Cho, N. H., Han, E., ... & Lee, J. H. (2020). The clinical characteristics and outcomes of patients with moderate-to-severe coronavirus disease 2019 infection and diabetes in Daegu, South Korea. <i>Diabetes &amp; metabolism journal</i> , 44(4), 602.       |                      |    |   | x |    |   |
| Kuderer, N. M., Choueiri, T. K., Shah, D. P., Shyr, Y., Rubinstein, S. M., Rivera, D. R., ... & Loaiza-Bonilla, A. (2020). Clinical impact of COVID-19 on patients with cancer (CCC19): a cohort study. <i>The Lancet</i> , 395(10241), 1907-1918.                                                                |                      | x  |   |   |    |   |
| Lee, L. Y., Cazier, J. B., Starkey, T., Turnbull, C. D., Team, U. C. C. M. P., Kerr, R., & Middleton, G. (2020). COVID-19 mortality in patients with cancer on chemotherapy or other anticancer treatments: a prospective cohort study. <i>The Lancet</i> , 395(10241), 1919-1926.                                |                      |    | x |   |    |   |
| Lee, L. Y., Cazier, J. B., Starkey, T., Briggs, S. E., Arnold, R., Bisht, V., ... & Wyatt, S. (2020). COVID-19 prevalence and mortality in patients with cancer and the effect of primary tumour subtype and patient demographics: a prospective cohort study. <i>The lancet oncology</i> , 21(10), 1309-1316.    |                      |    |   | x |    |   |
| Li, Q., Chen, L., Li, Q., He, W., Yu, J., Chen, L., ... & Hu, Y. (2020). Cancer increases risk of in-hospital death from COVID-19 in persons< 65 years and those not in complete remission. <i>Leukemia</i> , 34(9), 2384-2391.                                                                                   |                      | x  |   |   |    |   |
| Lieberman-Cribbin, W., Rapp, J., Alpert, N., Tuminello, S., & Taioli, E. (2020). The impact of asthma on mortality in patients with COVID-19. <i>Chest</i> , 158(6), 2290-2291.                                                                                                                                   |                      | x  |   |   |    |   |
| Mahdavinia, M., Foster, K. J., Jauregui, E., Moore, D., Adnan, D., Andy-Nweye, A. B., ... & Bishehsari, F. (2020). Asthma prolongs intubation in COVID-19. <i>The Journal of Allergy and Clinical Immunology: In Practice</i> , 8(7), 2388-2391.                                                                  |                      |    |   | x |    |   |
| Mato, A. R., Roeker, L. E., Lamanna, N., Allan, J. N., Leslie, L., Pagel, J. M., ... & Eyre, T. A. (2020). Outcomes of COVID-19 in patients with CLL: a multicenter international experience. <i>Blood, The Journal of the American Society of Hematology</i> , 136(10), 1134-1143.                               |                      |    | x |   |    |   |
| McCarty, T. R., Hathorn, K. E., Redd, W. D., Rodriguez, N. J., Zhou, J. C., Bazarbashi, A. N., ... & Chan, W. W. (2020). How do presenting symptoms and outcomes differ by race/ethnicity among hospitalized patients with COVID-19 infection? Experience in Massachusetts. <i>Clinical Infectious Diseases</i> . |                      |    |   |   | x  |   |
| Mehta, V., Goel, S., Kabarriti, R., Cole, D., Goldfinger, M., Acuna-Villaorduna, A., ... & Verma, A. (2020). Case fatality rate of cancer patients with COVID-19 in a New York hospital system. <i>Cancer discovery</i> , 10(7), 935-941.                                                                         |                      |    | x |   |    |   |
| Mendy, A., Apewokin, S., Wells, A. A., & Morrow, A. L. (2020). Factors associated with hospitalization and disease severity in a racially and ethnically diverse population of COVID-19 patients. <i>MedRxiv</i> .                                                                                                |                      | x  |   |   |    |   |
| Mikami, T., Miyashita, H., Yamada, T., Harrington, M., Steinberg, D., Dunn, A., & Siau, E. (2021). Risk factors for mortality in patients with COVID-19 in New York City. <i>Journal of general internal medicine</i> , 36(1), 17-26.                                                                             |                      | x  |   |   |    |   |
| Miyashita, H., & Kuno, T. (2020). Prognosis of coronavirus disease 2019 (COVID-19) in patients with HIV infection in New York City. <i>HIV medicine</i> .                                                                                                                                                         |                      | x  |   |   |    |   |
| Miyashita, H., Mikami, T., Chopra, N., Yamada, T., Chernyavsky, S., Rizk, D., & Cruz, C. (2020). Do patients with cancer have a poorer prognosis of COVID-19? An experience in New York City. <i>Annals of Oncology</i> .                                                                                         |                      | x  |   |   |    |   |
| Miyashita, S., Yamada, T., Mikami, T., Miyashita, H., Chopra, N., & Rizk, D. (2020). Impact of dementia on clinical outcomes in elderly patients with coronavirus 2019 (COVID-19): an experience in New York. <i>Geriatrics &amp; Gerontology International</i> , 20(7), 732.                                     |                      |    |   | x |    |   |
| Moon, S. S., Lee, K., Park, J., Yun, S., Lee, Y. S., & Lee, D. S. (2020). Clinical characteristics and mortality predictors of COVID-19 patients hospitalized at nationally-designated treatment hospitals. <i>Journal of Korean Medical Science</i> , 35(36).                                                    |                      | x  |   |   |    |   |

| Reference (st: Stratification of age only (no adjustment in model); co: Comorbidities missing; p: Special population (i.e. cancer patients, patients with diabetes); a: Age effect estimate not provided; ag: age category unclear; o: Other)                                                                                                                             | Reason for exclusion |    |   |   |    |   |
|---------------------------------------------------------------------------------------------------------------------------------------------------------------------------------------------------------------------------------------------------------------------------------------------------------------------------------------------------------------------------|----------------------|----|---|---|----|---|
|                                                                                                                                                                                                                                                                                                                                                                           | st                   | co | p | a | ag | o |
| Nakeshbandi, M., Maini, R., Daniel, P., Rosengarten, S., Parmar, P., Wilson, C., ... & Breitman, I. (2020). The impact of obesity on COVID-19 complications: a retrospective cohort study. <i>International Journal of Obesity</i> , 44(9), 1832-1837.                                                                                                                    |                      | x  |   |   |    |   |
| Okoh, A. K., Sossou, C., Dangayach, N. S., Meledathu, S., Phillips, O., Raczek, C., ... & Grewal, H. S. (2020). Coronavirus disease 19 in minority populations of Newark, New Jersey. <i>International journal for equity in health</i> , 19(1), 1-8.                                                                                                                     |                      | x  |   |   |    |   |
| Passamonti, F., Cattaneo, C., Arcaini, L., Bruna, R., Cavo, M., Merli, F., ... & ITA-HEMA-COV Investigators. (2020). Clinical characteristics and risk factors associated with COVID-19 severity in patients with haematological malignancies in Italy: a retrospective, multicentre, cohort study. <i>The Lancet Haematology</i> , 7(10), e737-e745.                     |                      |    | x |   |    |   |
| Pettit, N. N., MacKenzie, E. L., Ridgway, J. P., Pursell, K., Ash, D., Patel, B., & Pho, M. T. (2020). Obesity is associated with increased risk for mortality among hospitalized patients with COVID-19. <i>Obesity</i> , 28(10), 1806-1810.                                                                                                                             |                      |    |   |   | x  |   |
| Pinato, D. J., Zambelli, A., Bower, M., Sng, C. C., Salazar, R., Bertuzzi, A., ... & Gennari, A. (2020). Clinical portrait of the SARS-CoV-2 epidemic in European patients with cancer. <i>Cancer discovery</i> , 10(10), 1465-1474.                                                                                                                                      |                      |    | x |   |    |   |
| Rastad, H., Karim, H., Ejtahed, H. S., Tajbakhsh, R., Noorisepehr, M., Babaei, M., ... & Qorbani, M. (2020). Risk and predictors of in-hospital mortality from COVID-19 in patients with diabetes and cardiovascular disease. <i>Diabetology &amp; metabolic syndrome</i> , 12(1), 1-11.                                                                                  |                      |    | x |   |    |   |
| Regina, J., Papadimitriou-Olivgeris, M., Burger, R., Le Pogam, M. A., Niemi, T., Filippidis, P., ... & Lhopitallier, L. (2020). Epidemiology, risk factors and clinical course of SARS-CoV-2 infected patients in a Swiss university hospital: an observational retrospective study. <i>Plos one</i> , 15(11), e0240781.                                                  |                      | x  |   |   |    |   |
| Rivera-Izquierdo, M., del Carmen Valero-Ubierna, M., R-delAmo, J. L., Fernández-García, M. Á., Martínez-Diz, S., Tahery-Mahmoud, A., ... & Jiménez-Mejías, E. (2020). Sociodemographic, clinical and laboratory factors on admission associated with COVID-19 mortality in hospitalized patients: A retrospective observational study. <i>PLoS One</i> , 15(6), e0235107. |                      | x  |   |   |    |   |
| Robilotti, E. V., Babady, N. E., Mead, P. A., Rolling, T., Perez-Johnston, R., Bernardes, M., ... & Kamboj, M. (2020). Determinants of COVID-19 disease severity in patients with cancer. <i>Nature medicine</i> , 26(8), 1218-1223.                                                                                                                                      |                      |    | x |   |    |   |
| Rossi, A. P., Gottin, L., Donadello, K., Schweiger, V., Nocini, R., Taiana, M., ... & Polati, E. (2020). Obesity as a risk factor for unfavourable outcomes in critically ill patients affected by Covid-19 related respiratory failure: clinical relevance and potential pathophysiological mechanism.                                                                   |                      |    |   | x |    |   |
| Rottoli, M., Bernante, P., Belvedere, A., Balsamo, F., Garelli, S., Giannella, M., ... & Bartoletti, M. (2020). How important is obesity as a risk factor for respiratory failure, intensive care admission and death in hospitalised COVID-19 patients? Results from a single Italian centre. <i>European Journal of Endocrinology</i> , 183(4), 389-397.                |                      | x  |   |   |    |   |
| Russell, B., Moss, C., Papa, S., Irshad, S., Ross, P., Spicer, J., ... & Van Hemelrijck, M. (2020). Factors affecting COVID-19 outcomes in cancer patients: a first report from Guy's Cancer Center in London. <i>Frontiers in oncology</i> , 10, 1279.                                                                                                                   |                      |    | x |   |    |   |
| Sanchez-Pina, J. M., Rodríguez Rodríguez, M., Castro Quismondo, N., Gil Manso, R., Colmenares, R., Gil Alos, D., ... & Calbacho, M. (2020). Clinical course and risk factors for mortality from COVID-19 in patients with haematological malignancies. <i>European journal of haematology</i> , 105(5), 597-607.                                                          |                      |    | x |   |    |   |
| Shah, V., Ko Ko, T., Zuckerman, M., Vidler, J., Sharif, S., Mehra, V., ... & Kulasekararaj, A. G. (2020). Poor outcome and prolonged persistence of SARS-CoV-2 RNA in COVID-19 patients with haematological malignancies; King's College Hospital experience. <i>British journal of haematology</i> , 190(5), e279-e282.                                                  |                      |    |   | x |    |   |
| Shang, Y., Liu, T., Wei, Y., Li, J., Shao, L., Liu, M., ... & Zhou, F. (2020). Scoring systems for predicting mortality for severe patients with COVID-19. <i>EClinicalMedicine</i> , 24, 100426.                                                                                                                                                                         |                      | x  |   |   |    |   |

| Reference (st: Stratification of age only (no adjustment in model); co: Comorbidities missing; p: Special population (i.e. cancer patients, patients with diabetes); a: Age effect estimate not provided; ag: age category unclear; o: Other)                                                                                                  | Reason for exclusion |    |   |   |    |   |
|------------------------------------------------------------------------------------------------------------------------------------------------------------------------------------------------------------------------------------------------------------------------------------------------------------------------------------------------|----------------------|----|---|---|----|---|
|                                                                                                                                                                                                                                                                                                                                                | st                   | co | p | a | ag | o |
| Shi, Q., Zhang, X., Jiang, F., Zhang, X., Hu, N., Bimu, C., ... & Wang, W. (2020). Clinical characteristics and risk factors for mortality of COVID-19 patients with diabetes in Wuhan, China: a two-center, retrospective study. <i>Diabetes care</i> , 43(7), 1382-1391.                                                                     |                      |    | x |   |    |   |
| Sigel, K., Swartz, T., Golden, E., Paranjpe, I., Somani, S., Richter, F., ... & Glicksberg, B. S. (2020). Covid-19 and people with HIV infection: outcomes for hospitalized patients in New York City. <i>Clinical Infectious Diseases</i> .                                                                                                   |                      | x  |   |   |    |   |
| Simonnet, A., Chetboun, M., Poissy, J., Raverdy, V., Noulette, J., Duhamel, A., ... & Verkindt, H. (2020). High prevalence of obesity in severe acute respiratory syndrome coronavirus-2 (SARS-CoV-2) requiring invasive mechanical ventilation. <i>Obesity</i> , 28(7), 1195-1199.                                                            |                      | x  |   |   |    |   |
| Singh, S., Bilal, M., Khan, A., Chowdhry, M., Sánchez-Luna, S. A., Kochhar, G. S., ... & Thompson, C. C. (2020). Outcomes of COVID-19 in Patients with Obesity in United States: A Large Research Network Study. Available at SSRN 3611983.                                                                                                    |                      |    |   | x |    |   |
| Singh, S., & Khan, A. (2020). Clinical characteristics and outcomes of coronavirus disease 2019 among patients with preexisting liver disease in the United States: a multicenter research network study. <i>Gastroenterology</i> , 159(2), 768-771.                                                                                           |                      |    |   | x |    |   |
| Singh, S., Khan, A., Chowdhry, M., Bilal, M., Kochhar, G. S., & Clarke, K. (2020). Risk of severe coronavirus disease 2019 in patients with inflammatory bowel disease in the United States: a multicenter research network study. <i>Gastroenterology</i> , 159(4), 1575-1578.                                                                |                      |    |   | x |    |   |
| Sisó-Almirall, A., Kostov, B., Mas-Heredia, M., Vilanova-Rotllan, S., Sequeira-Aymar, E., Sans-Corrales, M., ... & Benavent-Àreu, J. (2020). Prognostic factors in Spanish COVID-19 patients: A case series from Barcelona. <i>PLoS one</i> , 15(8), e0237960.                                                                                 | x                    |    |   |   |    |   |
| Smith, A. A., Fridling, J., Ibrahim, D., & Porter Jr, P. S. (2020). Identifying patients at greatest risk of mortality due to COVID-19: A New England perspective. <i>Western Journal of Emergency Medicine</i> , 21(4), 785.                                                                                                                  |                      | x  |   |   |    |   |
| Sun, H., Ning, R., Tao, Y., Yu, C., Deng, X., Zhao, C., ... & Xu, D. (2020). Risk factors for mortality in 244 older adults with COVID-19 in Wuhan, China: a retrospective study. <i>Journal of the American Geriatrics Society</i> , 68(6), E19-E23.                                                                                          |                      | x  |   |   |    |   |
| Sy, K. T. L., Haw, N. J. L., & Uy, J. (2020). Previous and active tuberculosis increases risk of death and prolongs recovery in patients with COVID-19. <i>Infectious Diseases</i> , 52(12), 902-907.                                                                                                                                          |                      |    |   | x |    |   |
| Wang, D., Yin, Y., Hu, C., Liu, X., Zhang, X., Zhou, S., ... & Peng, Z. (2020). Clinical course and outcome of 107 patients infected with the novel coronavirus, SARS-CoV-2, discharged from two hospitals in Wuhan, China. <i>Critical Care</i> , 24, 1-9.                                                                                    |                      | x  |   |   |    |   |
| Wang, K., Zuo, P., Liu, Y., Zhang, M., Zhao, X., Xie, S., ... & Liu, C. (2020). Clinical and Laboratory Predictors of In-hospital Mortality in Patients With Coronavirus Disease-2019: A Cohort Study in Wuhan, China. <i>Clinical infectious diseases</i> , 71(16), 2079-2088.                                                                |                      | x  |   |   |    |   |
| Xie, J., Covassin, N., Fan, Z., Singh, P., Gao, W., Li, G., ... & Somers, V. K. (2020, June). Association between hypoxemia and mortality in patients with COVID-19. In <i>Mayo Clinic Proceedings</i> (Vol. 95, No. 6, pp. 1138-1147). Elsevier.                                                                                              |                      | x  |   |   |    |   |
| Xu, J., Yang, X., Yang, L., Zou, X., Wang, Y., Wu, Y., ... & Shang, Y. (2020). Clinical course and predictors of 60-day mortality in 239 critically ill patients with COVID-19: a multicenter retrospective study from Wuhan, China. <i>Critical Care</i> , 24(1), 1-11.                                                                       |                      | x  |   |   |    |   |
| Yan, Y., Yang, Y., Wang, F., Ren, H., Zhang, S., Shi, X., ... & Dong, K. (2020). Clinical characteristics and outcomes of patients with severe covid-19 with diabetes. <i>BMJ open diabetes research and care</i> , 8(1), e001343.                                                                                                             |                      |    |   | x |    |   |
| Yang, Q., Zhou, Y., Wang, X., Gao, S., Xiao, Y., Zhang, W., ... & Wang, Y. (2020). Effect of hypertension on outcomes of adult inpatients with COVID-19 in Wuhan, China: a propensity score-matching analysis. <i>Respiratory research</i> , 21(1), 1-9.                                                                                       |                      |    |   | x |    |   |
| Yarza, R., Bover, M., Paredes, D., López-López, F., Jara-Casas, D., Castelo-Loureiro, A., ... & Gómez-Martín, C. (2020). SARS-CoV-2 infection in cancer patients undergoing active treatment: analysis of clinical features and predictive factors for severe respiratory failure and death. <i>European journal of cancer</i> , 135, 242-250. |                      |    | x |   |    |   |
| Yu, C., Lei, Q., Li, W., Wang, X., Liu, W., Fan, X., & Li, W. (2020). Clinical characteristics, associated factors, and predicting COVID-19 mortality risk: a retrospective study in Wuhan, China. <i>American journal of preventive medicine</i> , 59(2), 168-175.                                                                            |                      | x  |   |   |    |   |

| Reference (st: Stratification of age only (no adjustment in model); co: Comorbidities missing; p: Special population (i.e. cancer patients, patients with diabetes); a: Age effect estimate not provided; ag: age category unclear; o: Other)                                                                               | Reason for exclusion |    |   |   |    |   |
|-----------------------------------------------------------------------------------------------------------------------------------------------------------------------------------------------------------------------------------------------------------------------------------------------------------------------------|----------------------|----|---|---|----|---|
|                                                                                                                                                                                                                                                                                                                             | st                   | co | p | a | ag | o |
| Yun, F., Yun, L., Tao, B., Yusang, X., Jie, H., Jian, L., ... & Hongzhou, L. (2020). COVID-19 with Different Severity: A Multi-center Study of Clinical Features.                                                                                                                                                           |                      | x  |   |   |    |   |
| Zhang, F., Xiong, Y., Wei, Y., Hu, Y., Wang, F., Li, G., ... & Zhu, W. (2020). Obesity predisposes to the risk of higher mortality in young COVID-19 patients. <i>Journal of medical virology</i> , 92(11), 2536-2542.                                                                                                      |                      | x  |   |   |    |   |
| Zhang, H., Wang, L., Chen, Y., Wu, Q., Chen, G., Shen, X., ... & Xie, C. (2020). Outcomes of novel coronavirus disease 2019 (COVID-19) infection in 107 patients with cancer from Wuhan, China. <i>Cancer</i> , 126(17), 4023-4031.                                                                                         |                      |    | x |   |    |   |
| Zhang, P., Zhu, L., Cai, J., Lei, F., Qin, J. J., Xie, J., ... & Li, H. (2020). Association of inpatient use of angiotensin-converting enzyme inhibitors and angiotensin II receptor blockers with mortality among patients with hypertension hospitalized with COVID-19. <i>Circulation research</i> , 126(12), 1671-1681. |                      |    |   | x |    |   |
| Zhang, X., Guo, W., Hua, J., Luo, Z., Gao, S., Ran, L., ... & Wang, F. (2020). The incidence, risk factors and clinical outcomes of acute kidney injury in critically ill patients with COVID-19: A multicenter study.                                                                                                      |                      |    |   | x |    |   |
| Zhang, Y., Cui, Y., Shen, M., Zhang, J., Liu, B., Dai, M., ... & Pan, P. (2020). Association of diabetes mellitus with disease severity and prognosis in COVID-19: a retrospective cohort study. <i>Diabetes research and clinical practice</i> , 165, 108227.                                                              |                      |    |   | x |    |   |
| Zhou, F., Yu, T., Du, R., Fan, G., Liu, Y., Liu, Z., ... & Cao, B. (2020). Clinical course and risk factors for mortality of adult inpatients with COVID-19 in Wuhan, China: a retrospective cohort study. <i>The lancet</i> , 395(10229), 1054-1062.                                                                       |                      | x  |   |   |    |   |
| Zhu, L., She, Z. G., Cheng, X., Qin, J. J., Zhang, X. J., Cai, J., ... & Li, H. (2020). Association of blood glucose control and outcomes in patients with COVID-19 and pre-existing type 2 diabetes. <i>Cell metabolism</i> , 31(6), 1068-1077.                                                                            |                      |    |   | x |    |   |
| Zimmerman, P., Stroever, S., Burton, T., Hester, K., Kim, M., Fahy, R., ... & Nicastro, J. (2020). Mortality associated with intubation and mechanical ventilation in patients with COVID-19. <i>MedRxiv</i> .                                                                                                              |                      | x  |   |   |    |   |



Table S2. Characteristics of the included studies

| Author, Year<br>Country<br>(Ref)           | Study<br>Design         | Population<br>Sampling<br>Participants                                                                                                                                                                                                                                                                                                                                                | Age/Sex Characteristics                                                                                                                                     | Time period of<br>study                                                         | Age categories<br>used                                                          | Outcome<br><br>Outcome ascertainment                                            |
|--------------------------------------------|-------------------------|---------------------------------------------------------------------------------------------------------------------------------------------------------------------------------------------------------------------------------------------------------------------------------------------------------------------------------------------------------------------------------------|-------------------------------------------------------------------------------------------------------------------------------------------------------------|---------------------------------------------------------------------------------|---------------------------------------------------------------------------------|---------------------------------------------------------------------------------|
| Antwi-<br>Amoabeng<br>2020<br>USA<br>(165) | Retrospective<br>cohort | Patients in Renown Regional Medical Center (a referral hospital serving most of Northern Nevada) and affiliated satellite hospitals.<br><br>All people who had a positive nasopharyngeal RT-PCR test for SARS-COV-2.<br><br>N= 172                                                                                                                                                    | Mean age:<br>53 yrs.<br>Range: 33.5-68 yrs.<br><br>Male: 96 (55.8%)<br>Female: 76 (44.2%)                                                                   | March 12- May<br>8, 2020                                                        | ≤61 yrs. vs.<br>>61 yrs.                                                        | Mortality (in hospital)<br><br>Data extracted from electronic health records    |
| Argenziano<br>2020<br>USA<br>(166)         | Prospective cohort      | First 1000 consecutive adult COVID-19 patients at New York-Presbyterian/ Columbia University Irving Medical Center (NYP/CUIMC) registered in the emergency department or as inpatients.<br><br>Laboratory-confirmed COVID-19 infection confirmed by SARS-CoV-2 RT-PCR test<br><br>N=1000                                                                                              | Median age:<br>63.0 yrs.<br>IQR: 50.0-75.0 yrs.<br><br>Male: 596 (59.6%)<br>Female: 404 (41.4%)                                                             | March 11-April<br>6 <sup>th</sup> , 2020<br>followed up until<br>April 30, 2020 | Per year                                                                        | ICU admission<br><br>In-hospital mortality<br><br>Hospital records              |
| Azar<br>2020<br>USA<br>(167)               | Retrospective<br>cohort | Sutter health system, delivering comprehensive medical services in ambulatory clinics and acute care hospitals in North California.<br><br>Patients aged 18 or older with a positive test result in the HER laboratory records or patients who had a documented ICD-10 diagnosis of confirmed COVID-19 in the electronic health record without a positive test result.<br><br>N= 1052 | Mean age:<br>53.0 yrs.<br>95% CI: 51.8-54.1 yrs.<br><br>Male: 518 (49.2%)<br>Female: 534 (50.8%)                                                            | COVID-19<br>diagnosis<br>January 1 – April<br>8, 2020                           | 18-39 years<br>40-49 yrs.<br>50-59 yrs.<br>60-69 yrs.<br>70-79 yrs.<br>80+ yrs. | Hospitalization<br><br>Data extracted from the Sutter electronic health records |
| Baqui<br>2020<br>Brazil<br>(168)           | Retrospective<br>cohort | Hospitalized patients in North Region and Central-south region in Brazil with a positive RT-PCR test for severe acute respiratory syndrome coronavirus 2 and who had ethnicity information in the data set SIVEP-Grip (Sistema de Informação de Vigilância Epidemiológica da Gripe).                                                                                                  | Mean age (SD)<br>North region:<br>Survivors: 46.9 yrs. (19.3)<br>Non-survivors: 65.3 yrs.<br>(16.0)<br>Central-south region:<br>Survivors: 52.2 yrs. (16.6) | February 27-<br>May 4, 2020                                                     | <40 yrs.<br>40-50 yrs.<br>50-60 yrs.<br>60-70 yrs.<br>≥70 yrs.                  | Mortality (in-hospital)<br><br>Information on death through SIVEP-Grip          |

| Author, Year<br>Country<br>(Ref)                | Study<br>Design         | Population<br>Sampling<br>Participants                                                                                                                                                                                                                                                                                                                                                                                                                                                                                                                                                      | Age/Sex Characteristics                                                                                                                                                                                                                                                                                                                                           | Time period of<br>study                   | Age categories<br>used                                            | Outcome<br><br>Outcome ascertainment                                                                                                                                                                                               |
|-------------------------------------------------|-------------------------|---------------------------------------------------------------------------------------------------------------------------------------------------------------------------------------------------------------------------------------------------------------------------------------------------------------------------------------------------------------------------------------------------------------------------------------------------------------------------------------------------------------------------------------------------------------------------------------------|-------------------------------------------------------------------------------------------------------------------------------------------------------------------------------------------------------------------------------------------------------------------------------------------------------------------------------------------------------------------|-------------------------------------------|-------------------------------------------------------------------|------------------------------------------------------------------------------------------------------------------------------------------------------------------------------------------------------------------------------------|
|                                                 |                         | N= 6882                                                                                                                                                                                                                                                                                                                                                                                                                                                                                                                                                                                     | Non-survivors: 67.9 yrs.<br>(15.8)<br><br>Male: 58.2%<br>Female: 42.8%                                                                                                                                                                                                                                                                                            |                                           |                                                                   |                                                                                                                                                                                                                                    |
| Bello-Chavolla<br>2020<br>Mexico<br>(170)       | Retrospective<br>cohort | Individuals with confirmed cases of COVID-19 from<br>the General Directorate of Epidemiology of the<br>Mexican Ministry of Health.<br><br>N= 51, 633                                                                                                                                                                                                                                                                                                                                                                                                                                        | Mean age (SD)<br>46.65 yrs. (15.83)<br><br>Male: 29,803 (57.7%)<br>Female:21,830 (42.3%)                                                                                                                                                                                                                                                                          | Until May 18,<br>2020                     | <40 yrs.<br>≥40yrs. - ≤65 yrs.<br>>65 yrs.                        | 30-day mortality (population<br>based)<br><br>Data from Mexican Ministry of<br>Health                                                                                                                                              |
| Bi, Hong, and<br>Meng<br>2020<br>China<br>(173) | Prospective cohort      | Patients at Shenzhen Third People's Hospital, the<br>designated hospital to treat all patients diagnosed<br>with COVID-19 in Shenzhen, China, regardless of<br>clinical severity and symptom profile.<br><br>N= 420                                                                                                                                                                                                                                                                                                                                                                         | Mean age (IQR)<br>45 yrs. (34.60)<br><br>Male: 200 (47.6%)<br>Female: 220 (52.4%)                                                                                                                                                                                                                                                                                 | January 11-<br>March 10, 2020             | 0-39 yrs.<br>40-59 yrs.<br>60+                                    | ICU Admission (hospital based)<br><br>Hospital records                                                                                                                                                                             |
| Boulle<br>2020<br>South Africa<br>(176)         | Prospective cohort      | Public sector patients aged ≥20 years with<br>documented sex and not known to have died before<br>March 1, 2020 (before first diagnosed COVID-19<br>case) in the Western Cape Provincial Health Data<br>Centre (WCPHDC).<br><br>COVID-19 diagnosis based on a positive SARS-CoV-2<br>PCR test, available to all until June 1, 2020 and then<br>restricted to patients requiring admission or aged<br>>55 years or with comorbidities.<br><br>All public-sector SARS-Cov-2 cases diagnosed before<br>June 1, 2020<br>N= 15,203<br><br>Hospitalized public-sector SARS-CoV-2 cases<br>N= 2978 | Age<br>All public-sector SARS-Cov-2<br>cases diagnosed before June<br>1, 2020<br>Survivors<br>20-39 yrs: 8,653 (59%)<br>40-49 yrs.: 2,991 (20%)<br>50-59 yrs.: 1,881 (13%)<br>60-69 yrs.: 739 (5%)<br>≥70 yrs.: 429 (3%)<br>Non-survivors<br>20-39 yrs: 35 (7%)<br>40-49 yrs.: 51 (10%)<br>50-59 yrs.: 137 (27%)<br>60-69 yrs.: 150 (29%)<br>≥ 70 yrs.: 137 (27%) | Deaths 100 days<br>since March 1,<br>2020 | 20-39 yrs.<br>40-49 yrs.<br>50-59 yrs.<br>60-69 yrs.<br>≥70 yrs.  | Mortality by 100 days for:<br>-all adult cases diagnosed<br>before June 1, 2020<br>(population-based mortality)<br><br>and<br>-hospitalized adult COVID-19<br>cases (in-hospital mortality)<br><br>Ascertainment through<br>WCPHDC |
| Burn<br>2020<br>Spain<br>(177)                  | Retrospective<br>cohort | Individuals recorded in the Information System for<br>Research in Primary Care database (SIDIAP) in<br>Catalonia, Spain, with at least one year of prior<br>history available, no prior diagnosis for COVID-19                                                                                                                                                                                                                                                                                                                                                                              | Median age<br>Whole study population<br>44 yrs., IQR: 25-60 yrs.<br>Diagnosed with COVID-19                                                                                                                                                                                                                                                                       | March 1, 2020 to<br>May 6, 2020           | 5-year age<br>categories<br>starting with 20<br>years to 95 years | Hospitalization with COVID-19<br>(population based)<br>Hospitalization with COVID-19<br>(diagnosed cases)                                                                                                                          |

| Author, Year<br>Country<br>(Ref)                      | Study<br>Design      | Population<br>Sampling<br>Participants                                                                                                                                                                                                                                                                                                                                                                                            | Age/Sex Characteristics                                                                                                                                                                                                                                                                | Time period of<br>study                     | Age categories<br>used               | Outcome<br><br>Outcome ascertainment                                                                                                                  |
|-------------------------------------------------------|----------------------|-----------------------------------------------------------------------------------------------------------------------------------------------------------------------------------------------------------------------------------------------------------------------------------------------------------------------------------------------------------------------------------------------------------------------------------|----------------------------------------------------------------------------------------------------------------------------------------------------------------------------------------------------------------------------------------------------------------------------------------|---------------------------------------------|--------------------------------------|-------------------------------------------------------------------------------------------------------------------------------------------------------|
|                                                       |                      | and who were not hospitalized on March 1, 2020 included. SIDIAP captures patient records from 80% of the Catalan population, and is representative in geography, age, and gender.<br>Linkage was made at an individual level to COVID-19 PT-PCR testing data, hospital data, and regional mortality data.<br><br>General population: N= 5,586,521<br>Diagnosed with COVID-19: N= 102,002<br>Hospitalized with COVID-19: N= 16,901 | 47 yrs., IQR: 36-61<br>Hospitalized after diagnosis<br>61 yrs. (50-75 yrs.)<br>Died after being hospitalized<br>81 yrs. (73-87 yrs.)<br><br>Sex<br>Diagnosed with COVID-19<br>Female: 59 %<br>Male: 41%<br>Hospitalized after diagnosis<br>Female: 4,357 (46.2%)<br>Male: 5080 (53.8%) |                                             |                                      | Mortality (from diagnosed to death/population based)<br><br>Mortality (hospital-based)<br><br>Outcome ascertainment through SIDIAP.                   |
| Carrillo-Vega*<br>2020<br>Mexico<br>(180)             | Retrospective cohort | All records of positive cases of COVID-19 from the Epidemiological Surveillance System for Viral Respiratory Diseases of the Mexican Ministry of Health<br><br>N= 9946                                                                                                                                                                                                                                                            | Mean age (SD)<br>48.15 yrs. (14.35)<br><br>Sex<br>Male: 5753 (57.8%)<br>Female: 4193 (42.2%)                                                                                                                                                                                           | Until April 23, 2020                        | 25-49 yrs.<br>50-74 yrs.<br>≥75 yrs. | Hospitalization by individuals testing positive (population-based)<br><br>Mortality (population-based)<br><br>Records from Mexican Ministry of Health |
| Carter and Collins**<br>2020<br>UK and Italy<br>(181) | Prospective cohort   | Network of clinical teams with an interest in frailty from ten UK sites and one Italian site as part of the COVID-19 in Older People (COPE) study.<br>All consecutive patients admitted to hospitals aged ≥18 years with diagnosis of COVID-19. Diagnosis through swabs or by clinical diagnosis.<br><br>N= 1564<br>UK: 1410 (90.2%)<br>Italy: 154 (9.8%)                                                                         | Median age: 74 yrs.<br>IQR: 61-83<br><br>Male: 903 (57.7%)<br>Female: 661 (42.3%)                                                                                                                                                                                                      | Admitted between February 27-April 28, 2020 | <65 yrs.<br>65-79 yrs.<br>>80 yrs.   | Mortality from the date of admission or date of diagnosis (in-hospital mortality)<br><br>Day 7 mortality (in-hospital)<br><br>Hospital records        |
| Chen and Bai<br>2020<br>China<br>(184)                | Retrospective cohort | Hospitalized patients in three branches of Tongji Hospital with confirmed COVID-19<br><br>N= 3309                                                                                                                                                                                                                                                                                                                                 | Median age: 62 yrs.<br>IQR: 49-69 yrs.<br><br>Male: 1642 (49.6%)<br>Female: 1667 (50.4%)                                                                                                                                                                                               | January 18-March 27, 2020                   | ≤ 45 yrs.<br>> 45 yrs.               | Mortality (in-hospital)<br><br>Hospital records                                                                                                       |

| Author, Year<br>Country<br>(Ref)                      | Study<br>Design      | Population<br>Sampling<br>Participants                                                                                                                                                                                                                                                                                                         | Age/Sex Characteristics                                                                                               | Time period of<br>study                                            | Age categories<br>used             | Outcome<br><br>Outcome ascertainment                                         |
|-------------------------------------------------------|----------------------|------------------------------------------------------------------------------------------------------------------------------------------------------------------------------------------------------------------------------------------------------------------------------------------------------------------------------------------------|-----------------------------------------------------------------------------------------------------------------------|--------------------------------------------------------------------|------------------------------------|------------------------------------------------------------------------------|
| Cchiba and Patel <sup>‡</sup><br>2020<br>USA<br>(186) | Retrospective cohort | Patients of all ages (two <18 years) with confirmed diagnosis of COVID-19 with RT-PCR in 10 hospitals affiliated with Northwestern Medicine (Chicago and surrounding Illinois suburbs)<br><br>N= 1526                                                                                                                                          | <40 yrs.: 414 (27.1%)<br>40-69 yrs.: 844 (55.3%)<br>≥70 yrs.: 268 (17.6%)<br><br>Male: 718 (47%)<br>Female: 808 (53%) | March 1- April 15, 2020; mortality determined up to April 30, 2020 | <40 yrs.<br>40-69 yrs.<br>≥70 yrs. | Hospitalization<br><br>Ascertainment by electronic records                   |
| Chilimuri<br>2020<br>USA<br>(187)                     | Retrospective cohort | Consecutive patients 18 years and above diagnosed with COVID-19 by RT-PCR test and admitted to the Bronxcare Health System (BCHS) hospital in the South Bronx, New York City.<br><br>N= 375                                                                                                                                                    | Median age: 63 yrs.<br>IQR: 52-72<br><br>Male: 236 (63%)<br>Female: 139 (37%)                                         | March 9 – April 9, 2020                                            | Per year                           | Mortality (in-hospital)<br><br>Hospital and electronic health records        |
| Ciardullo<br>2020<br>Italy<br>(188)                   | Retrospective cohort | Patients aged 18 years or older admitted to Policlinico di Monza hospital in Monza, Italy diagnosed with COVID-19 through RT-PCR tests and/or clinically by the presence of typical symptoms, exposures to known affected individuals and radiographic findings of interstitial pneumonia.<br><br>N=371 (339 for analysis due to missing data) | Mean age: 72 yrs.<br>SD= 14<br><br>Male: 210 (65.4%)<br>Female: 129 (34.6%)                                           | February 22-May 15, 2020                                           | Per year                           | Mortality (in-hospital)<br><br>Hospital and electronic records               |
| Conversano and Melillo<br>2020<br>Italy<br>(190)      | Retrospective cohort | All patients admitted to San Raffaele Hospital in Milan with a confirmed diagnosis of SARS-CoV-2 pneumonia by chest radiograph or computed tomographic scan and real-time polymerase chain reaction.<br><br>N=191                                                                                                                              | Mean age: 63.4 yrs.<br>SD: 14.9<br><br>Male: 131 (68.6%)<br>Female: 60 (31.4%)                                        | February 27-March 17, 2020 followed up until April 8, 2020         | Per year                           | Mortality (in-hospital)<br><br>Hospital electronic records                   |
| Costa Monteiro<br>2020<br>USA<br>(191)                | Retrospective cohort | First 112 hospitalized patients 18 years or older with a positive PCR test or mini-bronchoalveolar lavage test at the University of California, Los Angeles (UCLA) hospital system (Ronald Reagan UCLA Medical Center and Santa Monica UCLA Medical Center)<br><br>N=112                                                                       | Median age: 61 yrs.<br>IQR: 45-74<br><br>Male: 74 (66%)<br>Female: 38 (34%)                                           | March 12- April 16, 2020                                           | Per year                           | Mechanical ventilation<br><br>Electronic health records/<br>hospital records |
| Cummings<br>2020                                      | Prospective cohort   | Adult patients (aged 18 years or older) admitted to one of two New York-Presbyterian hospitals                                                                                                                                                                                                                                                 | Median age: 62 yrs.<br>IQR: 51-72                                                                                     | March 2- April 1, 2020 followed                                    | Per 10-year increase               | In-hospital mortality among critically ill patients                          |

| Author, Year<br>Country<br>(Ref)            | Study<br>Design         | Population<br>Sampling<br>Participants                                                                                                                                                                                                                                                                                                                                                                                                                                 | Age/Sex Characteristics                                                                                                                  | Time period of<br>study                                                                 | Age categories<br>used                                           | Outcome<br><br>Outcome ascertainment                                                                                                                                                                                                                       |
|---------------------------------------------|-------------------------|------------------------------------------------------------------------------------------------------------------------------------------------------------------------------------------------------------------------------------------------------------------------------------------------------------------------------------------------------------------------------------------------------------------------------------------------------------------------|------------------------------------------------------------------------------------------------------------------------------------------|-----------------------------------------------------------------------------------------|------------------------------------------------------------------|------------------------------------------------------------------------------------------------------------------------------------------------------------------------------------------------------------------------------------------------------------|
| USA<br>(193)                                |                         | affiliated with Columbia University Irving Medical Center in northern Manhattan, New York City and diagnosed with laboratory-confirmed (RT-PCR) COVID-19 and were critically ill with acute hypoxaemic respiratory failure.<br><br>N= 257                                                                                                                                                                                                                              |                                                                                                                                          | up until April 28, 2020                                                                 |                                                                  | Medical/hospital records                                                                                                                                                                                                                                   |
| Di Castelnuovo<br>2020<br>Italy<br>(197)    | Retrospective<br>cohort | Hospitalized Patients in 30 Italian clinical centres.<br><br>Laboratory-confirmed SARS-CoV-2 infection confirmed by polymerase chain reaction on a nasopharyngeal swab.<br><br>N=3894                                                                                                                                                                                                                                                                                  | Median age:<br>67 yrs.<br>IQR: 55-79 yrs.<br><br>Male: 2403 (61.7%)<br>Female: 1491 (38.3%)                                              | February 19-May<br>23, 2020<br>assessed on May<br>29, 2020                              | 18-44 yrs.<br>45-64 yrs.<br>65-74 yrs.<br>75-84 yrs.<br>85+ yrs. | In-hospital mortality or<br>palliative discharge<br><br>Clinical data were abstracted<br>from electronic medical records<br>or charts                                                                                                                      |
| Docherty<br>2020<br>United Kingdom<br>(198) | Prospective cohort      | Admitted patients to one of 208 acute care hospitals in England, Scotland, and Wales who tested positive for SARS-CoV-2.<br><br>RT-PCT was the only mode of testing available during the period of study. The decision to test was at the discretion of the clinician attending the patient, and not defined by protocol. Only patients who tested positive for Covid-19 were eligible for enrolment.<br><br>N= 20,133 (34% of covid-19 admissions in the 3 countries) | Median age:<br>73 yrs.<br>IQR: 58-82 yrs.<br>Range: 0-104 yrs.<br><br>Male: 12,068 (59.9%)<br>Female: 8065 (40.1%)                       | February 6 -<br>April 19, 2020<br>followed up until<br>May 3, 2020                      | <50 yrs.<br>50-59 yrs.<br>60-69 yrs.<br>70-79 yrs.<br>≥80 yrs.   | In-hospital mortality<br><br>Hospital records                                                                                                                                                                                                              |
| Du<br>2020<br>China<br>(199)                | Prospective cohort      | Hospitalized patients in Wuhan Pulmonary Hospital (Wuhan, Hubei Province, China).<br><br>All patients with confirmed or suspected COVID-19 pneumonia enrolled in this study were tested by RT-PCR test.<br><br>N=179                                                                                                                                                                                                                                                   | Mean age:<br>53.0 yrs.<br>SD: ±13.7 yrs.<br><br>Median age:<br>57.6 yrs.<br>IQR: 49-68 yrs.<br>Range: 18-87 yrs.<br><br>Male: 97 (54.2%) | December 25,<br>2019 - February<br>7, 2020<br>followed up until<br>February 14,<br>2020 | <60 yrs.<br>60-69 yrs.<br>≥70 yrs.                               | In-hospital risk of severity at<br>admission<br>(critically ill patients having one<br>of respiratory failure and<br>requirement for mechanical<br>ventilation, or shock or<br>combined with other organ<br>system failure which warrant<br>ICU admission) |

| Author, Year<br>Country<br>(Ref)        | Study<br>Design         | Population<br>Sampling<br>Participants                                                                                                                                                                                                                                                                                                                                                                                                                                 | Age/Sex Characteristics                                                                   | Time period of<br>study                                                | Age categories<br>used                            | Outcome<br><br>Outcome ascertainment                                                                                                                                                                                                                                    |
|-----------------------------------------|-------------------------|------------------------------------------------------------------------------------------------------------------------------------------------------------------------------------------------------------------------------------------------------------------------------------------------------------------------------------------------------------------------------------------------------------------------------------------------------------------------|-------------------------------------------------------------------------------------------|------------------------------------------------------------------------|---------------------------------------------------|-------------------------------------------------------------------------------------------------------------------------------------------------------------------------------------------------------------------------------------------------------------------------|
|                                         |                         |                                                                                                                                                                                                                                                                                                                                                                                                                                                                        | Female: 82 (45.8%)                                                                        |                                                                        |                                                   | Data were collected from the electronic medical records using a piloted case report form from the time of hospital admission.                                                                                                                                           |
| Ebinger<br>2020<br>USA<br>(201)         | Retrospective<br>cohort | Patients who had a laboratory-confirmed diagnosis of SARS-CoV-2 via RT-PCR while being evaluated or treated for signs or symptoms at the Cedars-Sinai Health System Los Angeles (California). It includes Cedars-Sinai Medical Center (CSMC), Marina Del Rey Hospital (MDRH), and affiliated clinics.<br><br>N=442                                                                                                                                                     | Mean age:<br>52.72 yrs.<br>SD: 19.65 yrs.<br><br>Male: 256 (57.9%)<br>Female: 186 (42.1%) | March 8 - March<br>21, 2020                                            | Per 10 years                                      | Illness severity in 3 categories:<br><u>Hospitalized/non-ICU</u> , ICU/Non-intubated, ICU/intubated<br><br>Electronic health records                                                                                                                                    |
| Giacomelli<br>2020<br>Italy<br>(209)    | Prospective cohort      | Hospitalized adult Covid-19 patients to Luigi Sacco Hospital in Milan (Italy).<br><br>All of the study patients had Covid-19 confirmed by a positive RT-PCR test on a nasopharyngeal swab.<br><br>N=233                                                                                                                                                                                                                                                                | Median age:<br>61 yrs.<br>IQR: 50-72 yrs.<br><br>Male: 72 (30.9%)<br>Female: 161 (69.1%)  | February 21 -<br>March 19, 2020<br>followed up until<br>April 20, 2020 | Per 10 years                                      | In-hospital mortality<br><br>Data were extracted from the patients' clinical charts on a daily basis.<br><br>The life status of the patients discharged before the censoring date was ascertained by means of telephone calls made by two physicians on 20 April, 2020. |
| Giannouchos*<br>2020<br>Mexico<br>(210) | Retrospective<br>cohort | Patients initially classified as "suspected cases of viral respiratory disease" during point of service at medical facilities in Mexico, from a dataset released by the Mexican Health Ministry and compiled by the General Bureau of Epidemiology through the System of Epidemiological Surveillance of Viral Respiratory Diseases (comprising of 475 monitoring units). Patients included had laboratory-confirmed diagnosis by RT-PCR if they had serious symptoms. | Mean age:<br>46.2 yrs.<br>SD: 16.0 yrs.<br><br>Male: 56.4%<br>Female: 43.6%               | Dataset released<br>on May 31, 2020                                    | 0-17 yrs.<br>18-44 yrs.<br>45-64 yrs.<br>≥65 yrs. | Population-based<br>hospitalization,<br><br>Electronic/medical records                                                                                                                                                                                                  |

| Author, Year<br>Country<br>(Ref)    | Study<br>Design         | Population<br>Sampling<br>Participants                                                                                                                                                                                                                                                                                                                                                 | Age/Sex Characteristics                                                                    | Time period of<br>study                                              | Age categories<br>used                                                                              | Outcome<br><br>Outcome ascertainment                                                                                                                                                                                               |
|-------------------------------------|-------------------------|----------------------------------------------------------------------------------------------------------------------------------------------------------------------------------------------------------------------------------------------------------------------------------------------------------------------------------------------------------------------------------------|--------------------------------------------------------------------------------------------|----------------------------------------------------------------------|-----------------------------------------------------------------------------------------------------|------------------------------------------------------------------------------------------------------------------------------------------------------------------------------------------------------------------------------------|
|                                     |                         | N=89,756                                                                                                                                                                                                                                                                                                                                                                               |                                                                                            |                                                                      |                                                                                                     |                                                                                                                                                                                                                                    |
| Grasselli<br>2020<br>Italy<br>(213) | Retrospective<br>cohort | All 4209 consecutive patients with confirmed SARS-CoV-2 infection were admitted to one of the COVID-19 Lombardy Network's ICUs. All the critically ill patients requiring ICU admission in Lombardy have been referred to the Regional Coordinating Center.<br><br>Laboratory-confirmed diagnosis of SARS-CoV-2 infection by RT-PCR test.<br><br>N = 3988                              | Median age:<br>63 yrs.<br>IQR: 56-69 yrs.<br><br>Male: 3188 (79.9%)<br>Female: 800 (20.1%) | February 20 -<br>April 22, 2020<br>followed up until<br>May 30, 2020 | Per 10 years                                                                                        | In-hospital mortality of ICU patients<br><br>The staff of the Regional Coordinating Center contacted each ICU of the Network daily by telephone and recorded on an electronic worksheet the demographic and clinical patient data. |
| Gu<br>2020<br>China<br>(214)        | Nested case-control     | Source data from 12,973 publicly reported laboratory-confirmed patients with Covid-19 in 31 province-level regions outside of Hubei Province in mainland China by the National Health Committee during the study period. Deaths included as cases and each case was matched with up to three controls on gender and age +/- 1 year old. Asymptomatic people not included.<br><br>N=275 | Median age:<br>68.0 yrs.<br>IQR: 22 yrs.<br><br>Male: 173 (62.9%)<br>Female: 102 (37.1%)   | December 18,<br>2019 - March 8,<br>2020                              | Per year                                                                                            | Population-based mortality<br><br>National/provincial/municipal health commission websites, the official COVID-19 data reporting websites in China.                                                                                |
| Gu<br>2020<br>USA<br>(215)          | Retrospective<br>cohort | Patients who were tested at University of Michigan Health System (MM), transfer patients from other hospitals, and patients who were tested elsewhere but treated at MM.<br><br>Diagnostic tests: RT-PCR (88.6%), commercial antibody test, COVID-19 nasopharynx or oropharynx PCR tests. Prioritized testing<br><br>N=1139 (Positive tests)<br>N= 523 (hospitalized)                  | Median age:<br>53 yrs.<br>IQR: 39-66 yrs.<br><br>Male: 531 (46.6%)<br>Female: 608 (53.4%)  | March 10 - April<br>22, 2020<br>followed up until<br>July 28, 2020   | Per 10 yrs.<br><18 yrs.<br>18- <35 yrs.<br>35- <50 yrs.<br>50- <65 yrs.<br>65- <80 yrs.<br>≥80 yrs. | Hospitalization<br>ICU (population-based)<br>Mortality (population-based)<br><br>Electronic health records                                                                                                                         |
| Gupta<br>2020<br>USA<br>(216)       | Prospective cohort      | Adult patients (≥18 years of age) with Covid-19 to participating admitted to ICUs in 65 hospitals in the USA.                                                                                                                                                                                                                                                                          | Mean age:<br>60.5 yrs.<br>SD: 14.5 yrs.                                                    | March 4 - April 4,<br>2020<br>followed up until<br>June 4, 2020      | 18-39 yrs.<br>40-49 yrs.<br>50-59 yrs.<br>60-69 yrs.                                                | 28-day in-hospital mortality for<br>ICU patients                                                                                                                                                                                   |

| Author, Year<br>Country<br>(Ref)                             | Study<br>Design         | Population<br>Sampling<br>Participants                                                                                                                                                                                                                                                                                                                                                                                                                                               | Age/Sex Characteristics                                                                         | Time period of<br>study         | Age categories<br>used             | Outcome<br><br>Outcome ascertainment                                                                                           |
|--------------------------------------------------------------|-------------------------|--------------------------------------------------------------------------------------------------------------------------------------------------------------------------------------------------------------------------------------------------------------------------------------------------------------------------------------------------------------------------------------------------------------------------------------------------------------------------------------|-------------------------------------------------------------------------------------------------|---------------------------------|------------------------------------|--------------------------------------------------------------------------------------------------------------------------------|
|                                                              |                         | Laboratory-confirmed diagnosis by nasopharyngeal or oropharyngeal swab.<br><br>N= 2215                                                                                                                                                                                                                                                                                                                                                                                               | Male: 1436 (64.8%)<br>Female: 779 (35.2%)                                                       |                                 | 70-79 yrs.<br>≥80 yrs.             | Mechanical ventilation for ICU patients<br><br>Electronic medical records.                                                     |
| Harrison<br>2020<br>USA<br>(219)                             | Retrospective<br>cohort | Patients 18 years or older with Covid-19 from 24 participating healthcare organizations (inpatient and outpatient care settings), distributed between the four large Census Bureau–designated regions of the US (Northeast/Midwest/South/West).<br><br>Identified based on a positive laboratory test (not specified) in their records and ICD-classification based on Centers for Disease Control and Prevention (CDC) coding guidelines. False positives excluded.<br><br>N=31,461 | Median age:<br>50 yrs.<br>IQR: 35-63 yrs.<br><br>Male: 14,306 (45.5%)<br>Female: 17,155 (54.5%) | January 20 - May<br>26, 2020    | Per year                           | Population-based mortality<br><br>Electronic medical records                                                                   |
| Hashemi<br>2020<br>USA<br>(220)                              | Retrospective<br>cohort | Adult patients hospitalized to nine hospitals (two large tertiary centres and seven community hospitals) in a single healthcare system in Massachusetts.<br><br>Laboratory-confirmed diagnosis of SARS-CoV-2 infection via polymerase chain reaction (PCR) nasopharyngeal swab or tracheal aspirate.<br><br>N=363                                                                                                                                                                    | Mean age:63.4 yrs.<br>SD: 16.5 yrs.<br><br>Male: 201 (55.4%)<br>Female: 162 (44.6%)             | March 11 – April<br>2, 2020     | Per year                           | In-hospital mechanical<br>ventilation<br>In-hospital ICU admission<br>In-hospital mortality<br><br>Electronic medical records. |
| Hewitt**<br>2020<br>United Kingdom<br>and Italy<br><br>(221) | Prospective cohort      | Adult patients (≥18 years) admitted with Covid-19 to ten participating hospitals in the UK and one in Italy, based on the COVID-19 in Older People (COPE) study.<br><br>Inclusion criteria were complete hospital records and laboratory-confirmed SARS-CoV-2-positive swabs or a clinical diagnosis made by the parent clinical team and based on signs, symptoms, or radiology consistent with Covid-19.                                                                           | Median age:<br>74 yrs.<br>IQR: 61-83 yrs.<br><br>Male: 903 (57.7%)<br>Female: 661 (42.3%)       | February 27 -<br>April 28, 2020 | <65 yrs.<br>65-79 yrs.<br>≥80 yrs. | In-hospital mortality<br>Day 7 mortality<br><br>Hospital/medical records                                                       |



| Author, Year<br>Country<br>(Ref)      | Study<br>Design         | Population<br>Sampling<br>Participants                                                                                                                                                                                                                                                          | Age/Sex Characteristics                                                                                    | Time period of<br>study                                                           | Age categories<br>used                                 | Outcome<br><br>Outcome ascertainment                                                                                                      |
|---------------------------------------|-------------------------|-------------------------------------------------------------------------------------------------------------------------------------------------------------------------------------------------------------------------------------------------------------------------------------------------|------------------------------------------------------------------------------------------------------------|-----------------------------------------------------------------------------------|--------------------------------------------------------|-------------------------------------------------------------------------------------------------------------------------------------------|
|                                       |                         | N=1564                                                                                                                                                                                                                                                                                          |                                                                                                            |                                                                                   |                                                        |                                                                                                                                           |
| Hwang<br>2020<br>South Korea<br>(224) | Retrospective<br>cohort | Included two cohorts of adult inpatients ( $\geq 18$ years old) with near severe stage of Covid-19 from Kyungpook National University Hospital and Kyungpook National University Chilgok Hospital in Daegu.<br><br>Confirmed diagnosis of SARS-CoV-2 infection by RT-PCR<br><br>N=103           | Mean age:<br>67.62 yrs.<br>SD: 15.32 yrs.<br>Range: 24-97 yrs.<br><br>Male: 52 (50%)<br>Female: 51 (50%)   | February 1 -<br>March 25, 2020                                                    | Per year                                               | In-hospital mortality (among moderate/severely diseased)<br><br>Electronic medical records.                                               |
| Imam<br>2020<br>USA<br>(225)          | Retrospective<br>cohort | Hospitalized patients in eight hospitals of Beaumont Health, the largest healthcare system in Southeast Michigan caring for over a third of patients in Detroit.<br><br>Laboratory-confirmed diagnosis of SARS-CoV-2 infection by using RT-PCR on nasopharyngeal swab.<br><br>N=1305            | Mean age:<br>61 yrs.<br>SD: 16.3 yrs.<br>Range: 24-97 yrs.<br><br>Male: 702 (53.8%)<br>Female: 603 (46.2%) | March 1 - April 1,<br>2020<br>Assessed on<br>April 17, 2020                       | >60 yrs. vs.<br><60 yrs.                               | In-hospital mortality<br><br>Electronic medical records.<br>Manual chart review to confirm mortality to ensure accuracy and completeness. |
| Jun<br>2020<br>USA<br>(226)           | Prospective cohort      | Admitted patients with Covid-19 to five Mount Sinai hospitals in New York City: Three in Manhattan; 1 in Brooklyn; 1 in Queens, through the emergency department<br><br>Nucleic acid-based test to detect SARS-CoV-2 infection in nasopharyngeal or oropharyngeal swab specimens.<br><br>N=3086 | Median age:<br>66 yrs.<br>IQR: 56-77 yrs.<br><br>Male: 1825 (59.1%)<br>Female: 1261 (40.9%)                | Admitted on or<br>before April 13,<br>2020<br>Followed<br>through June 2,<br>2020 | Per year                                               | In-hospital mortality<br><br>Electronic health records                                                                                    |
| Kabarriti<br>2020<br>USA<br>(227)     | Retrospective<br>cohort | Patients with Covid-19 who received care at the Montefiore Medical Center, a large academic medical center located in the Bronx (New York), whether or not they were admitted as patients.                                                                                                      | Median age:<br>58 yrs.<br>IQR: 44-71 yrs.<br><br>Male: 2773 (47%)                                          | March 14 - April<br>15, 2020<br>final data<br>collection on<br>April 27, 2020     | $\leq 40$ yrs.<br>41-60 yrs.<br>61-80 yrs.<br>>80 yrs. | Mortality (population-based)<br><br>Data were obtained from electronic medical records.                                                   |

| Author, Year<br>Country<br>(Ref)   | Study<br>Design         | Population<br>Sampling<br>Participants                                                                                                                                                                                                                                                                                                                                                                                                                                             | Age/Sex Characteristics                                                                                                                                                                                                                                      | Time period of<br>study                                                                             | Age categories<br>used                 | Outcome<br><br>Outcome ascertainment                                                                                                                 |
|------------------------------------|-------------------------|------------------------------------------------------------------------------------------------------------------------------------------------------------------------------------------------------------------------------------------------------------------------------------------------------------------------------------------------------------------------------------------------------------------------------------------------------------------------------------|--------------------------------------------------------------------------------------------------------------------------------------------------------------------------------------------------------------------------------------------------------------|-----------------------------------------------------------------------------------------------------|----------------------------------------|------------------------------------------------------------------------------------------------------------------------------------------------------|
|                                    |                         | SARS-CoV-2 positive status was determined based on reverse transcription quantitative polymerase chain reaction assay.<br><br>N=5902                                                                                                                                                                                                                                                                                                                                               | Female: 3129 (53%)                                                                                                                                                                                                                                           |                                                                                                     |                                        |                                                                                                                                                      |
| Kalligeros<br>2020<br>USA<br>(228) | Retrospective<br>cohort | Patients 18 years or older admitted with Covid-19 to Rhode Island Hospital, The Miriam Hospital, or Newport Hospital, in Rhode Island (USA).<br><br>Laboratory-confirmed diagnosis of SARS-CoV-2 infection by using a reverse transcriptase-polymerase chain reaction assay.<br><br>N=103                                                                                                                                                                                          | Median age:<br>60 yrs.<br>IQR: 52-70 yrs.<br><br>Male: 63 (61.17%)<br>Female: 67 (38.83%)                                                                                                                                                                    | February 17 -<br>April 5, 2020                                                                      | Per year                               | ICU admission within 10 days of hospital admission<br><br>Mechanical ventilation within 10 days of hospital admission<br><br>Electronic chart review |
| Khalil<br>2020<br>UK<br>(229)      | Prospective cohort      | Adult patients (≥18 years old) with laboratory-confirmed RT-PCR test COVID-19 admitted to Chelsea & Westminster Hospital, a central London teaching hospital.<br><br>N= 220                                                                                                                                                                                                                                                                                                        | Mean age:<br>66.9 years<br>95% CI: 64.7–69.2 years<br><br>Male: 130 (59.1%)<br>Female: 90 (40.9%)                                                                                                                                                            | March 7 -April 7,<br>2020<br>Followed up<br>until May 8,<br>2020                                    | Per year                               | In-hospital mortality at 28 days<br><br>Medical records, death certificates                                                                          |
| Killerby<br>2020<br>USA<br>(230)   | Retrospective<br>cohort | Hospitalized patients selected sequentially from hospital-provided lists of patients aged ≥18 years with laboratory (RT-PCR) confirmed COVID-19 and non-hospitalized patients aged ≥18 years with laboratory (RT-PCR) confirmed COVID-19-evaluated at outpatient clinics or an emergency department and not admitted. Data from six acute care hospitals and associated outpatient clinics in metropolitan Atlanta, Georgia.<br><br>N=531 (220 hospitalized, 311 non-hospitalized) | Non-hospitalized<br>Mean age: 45 years<br>IQR: 33.0-58.0 years<br>Hospitalized<br>Mean age: 61 years<br>IQR: 45.0-70.0 years<br><br>Non-hospitalized<br>Male: 114 (36.7%)<br>Female: 197 (63.3%)<br>Hospitalized<br>Male: 114 (51.8%)<br>Female: 106 (48.2%) | Hospitalized:<br>March 1 – March<br>30, 2020<br><br>Non-<br>hospitalized:<br>April 8-May 1,<br>2020 | 18-44 yrs.<br>45-64 yrs.<br>≤65 yrs.   | Hospitalization (included stays for observation and deaths that occurred in an emergency department (ED))<br><br>Medical records                     |
| Kim<br>2020<br>USA                 | Retrospective<br>cohort | Patients 18 years or older hospitalized with laboratory-confirmed COVID-19                                                                                                                                                                                                                                                                                                                                                                                                         | Median age: 62 yrs.<br>IQR: 50-75 yrs.                                                                                                                                                                                                                       | March 1 – May<br>2, 2020                                                                            | 18-39 yrs.<br>40-49 yrs.<br>50-64 yrs. | Intensive care unit (ICU)<br>In-hospital mortality                                                                                                   |

| Author, Year<br>Country<br>(Ref)    | Study<br>Design         | Population<br>Sampling<br>Participants                                                                                                                                                                                                                          | Age/Sex Characteristics                                                                                                                                                                   | Time period of<br>study                                   | Age categories<br>used                            | Outcome<br><br>Outcome ascertainment                                                                                              |
|-------------------------------------|-------------------------|-----------------------------------------------------------------------------------------------------------------------------------------------------------------------------------------------------------------------------------------------------------------|-------------------------------------------------------------------------------------------------------------------------------------------------------------------------------------------|-----------------------------------------------------------|---------------------------------------------------|-----------------------------------------------------------------------------------------------------------------------------------|
| (231)                               |                         | Identified through the Coronavirus Disease 2019-Associated Hospitalization Surveillance Network (COVID-NET) covering 154 acute-care hospital in 74 counties and 13 states in the USA and who had complete chart review.<br><br>N= 2491                          | Male: 1326 (53.2%)<br>Female: 1165 (46.8%)                                                                                                                                                | Assessed on May 2, 2020                                   | 65-74 yrs.<br>75-84 yrs.<br>≥85 yrs.              | COVID-NET surveillance                                                                                                            |
| Klang<br>2020<br>USA<br>(233)       | Retrospective<br>cohort | Hospitalized adult patients in a large academic hospital system in New York City (Mount Sinai, 5 hospitals) with positive RT-PCR test for COVID-19 and had definite outcomes (discharged or died). Patients with missing BMI data were excluded.<br><br>N= 3406 | Age ≤50 years: 572 (16.8%)<br>Age >50 years: 2834 (83.2%)<br><br>Age ≤50 years<br>Male: 397 (69.4%)<br>Female: 175 (30.6%)<br>Age >50 years<br>Male: 1564 (55.1%)<br>Female: 1270 (44.9%) | March 1- May 17, 2020                                     | Per decile, stratified by ≤50 years and >50 years | In-hospital mortality<br><br>Electronic medical records                                                                           |
| Lee<br>2020<br>South Korea<br>(235) | Retrospective<br>cohort | Patients hospitalized or isolated with laboratory-confirmed SARS-CoV2-infection via RT-PCR<br>Data from Korea Centers for Disease Control and Prevention (KCDC)<br><br>N= 8,266                                                                                 | Mean age: 44.36 years<br>SD: 19.13 years<br><br>Male: 3181 (39.48%)<br>Female: 5085 (61.52 %)                                                                                             | January 19 - March 16, 2020<br>assessed on March 24, 2020 | Per year                                          | Mortality within 60 days (hospitalized or isolated)<br><br>Electronic health records from the National Health Information Databas |
| Li<br>2020<br>China<br>(238)        | Retrospective<br>cohort | Patients with laboratory-confirmed SARS-CoV-2 infection via RT-PCR at Wuhan Seventh People's Hospital, Wuhan, China.<br><br>N= 596                                                                                                                              | Median age: 58 years<br>IQR: 47–68 years<br><br>Male: 280 (47.0 %)<br>Female: 316 (53.0 %)                                                                                                | January 23 - March 14, 2020                               | <65 years<br>≥ 65 years                           | In-hospital mortality<br><br>Electronic health records                                                                            |
| Magleby<br>2020<br>USA<br>(241)     | Retrospective<br>cohort | Patients with coronavirus disease confirmed via RT-PCR tests hospitalized at two hospitals in New York City (New York Presbyterian Hospital/Weill Cornell Medical Center and affiliated Lower Manhattan Hospital).<br><br>N= 678                                | Median age (IQR)<br>high viral load:<br>72 yrs. (60-81 yrs.)<br>medium viral load:<br>69 yrs. (58-79 yrs.)<br>low viral load:<br>63 yrs. (50-73 yrs.)                                     | March 30 - April 30, 2020                                 | Per year                                          | In-hospital mortality<br><br>Electronic medical records                                                                           |

| Author, Year<br>Country<br>(Ref)                                        | Study<br>Design          | Population<br>Sampling<br>Participants                                                                                                                                                                                                                                                                                                                               | Age/Sex Characteristics                                                                                                                                                                 | Time period of<br>study        | Age categories<br>used                               | Outcome<br><br>Outcome ascertainment                                         |
|-------------------------------------------------------------------------|--------------------------|----------------------------------------------------------------------------------------------------------------------------------------------------------------------------------------------------------------------------------------------------------------------------------------------------------------------------------------------------------------------|-----------------------------------------------------------------------------------------------------------------------------------------------------------------------------------------|--------------------------------|------------------------------------------------------|------------------------------------------------------------------------------|
|                                                                         |                          |                                                                                                                                                                                                                                                                                                                                                                      | high viral load<br>Male: 139 (63.2%)<br>Female: 81 (36.8%)<br>Medium viral load<br>Male: 132 (61.1%)<br>Female: 84 (38.9%)<br>Low viral load<br>Male: 143 (59.1%)<br>Female: 99 (40.9%) |                                |                                                      |                                                                              |
| Meng<br>2020<br>China<br>(248)                                          | Retrospective<br>cohort‡ | Patients with pathogen-confirmed COVID-19 via RT-PCR who were hospitalized at Tongji Hospital in Wuhan, China diagnosed with moderate to severe pathogen-confirmed COVID-19<br><br>N= 2556                                                                                                                                                                           | Age <sup>1</sup> :<br>≤49 years: 707 (26.53%)<br>50-64 years: 907 (34.93%)<br>65-79 years: 868 (32.57%)<br>≥80 years: 185 (06.94%)<br><br>Male: 1328 (49.83%)<br>Female: 1337 (50.17%)  | January 18 -<br>March 27, 2020 | ≤49 Years<br>50-64 years<br>65-79 years<br>≥80 years | In-hospital mortality<br><br>Medical records                                 |
| Merzon<br>2020<br>Israel<br>(249)                                       | Retrospective<br>cohort  | Population-based epidemiological study utilizing data from the Leumit Health Services (LHS) database. The study population included the 14,000 members of LHS tested for COVID-19 infection by PCR test.<br><br>N= 782 people with positive PCR test                                                                                                                 | Mean age: 35.58 years<br>(95% CI: 34.49-36.67)<br><br>Male: 385 (49.23%)<br>Female: 397 (50.77%)                                                                                        | February 1 -<br>April 30, 2020 | ≤50 years<br>>50 years                               | Hospitalization                                                              |
| Murillo-Zamora<br>and Hernandez-<br>Suarez††<br>2020<br>Mexico<br>(255) | Retrospective<br>cohort  | Hospitalized adult patients (18 and older) with a laboratory-confirmed case of COVID-19 within 14 days before symptoms onset identified from epidemiological surveillance of viral respiratory diseases, belonging to the Mexican Institute of Social Security (IMSS). IMSS provides health care services to more than 1/3 of population of Mexico.<br><br>N= 66,123 | Age (years)<br>20-29: 2264 (3.4%)<br>30-34: 10,616 (16.1%)<br>45-59: 22,415 (33.9%)<br>60+: 30,828 (46.6%)<br><br>Male: 40,124 (60.7%)<br>Female: 25,999 (39.3%)                        | March 4-August<br>15, 2020     | 20-29 yrs.<br>30-34 yrs.<br>45-59 yrs.<br>60+ yrs.   | In-hospital mortality<br><br>Medical records and death<br>certificates       |
| Narain<br>2020<br>USA<br>(257)                                          | Retrospective<br>cohort  | Patients admitted to the 12 hospitals and emergency departments within the Northwell Health system, the largest private nonprofit health system in New York State, who were diagnosed with                                                                                                                                                                           | For standard of care group:<br>Median age: 64.6 yrs.<br>IQR: 53.5-76.4                                                                                                                  | March 1- April<br>24, 2020     | Per year                                             | In-hospital mortality<br>among CCS patients<br><br>Electronic health records |

| Author, Year<br>Country<br>(Ref)           | Study<br>Design         | Population<br>Sampling<br>Participants                                                                                                                                                                                                                                                  | Age/Sex Characteristics                                                                                                                                                  | Time period of<br>study                                                                    | Age categories<br>used                                                | Outcome<br><br>Outcome ascertainment                                                                                                                                                         |
|--------------------------------------------|-------------------------|-----------------------------------------------------------------------------------------------------------------------------------------------------------------------------------------------------------------------------------------------------------------------------------------|--------------------------------------------------------------------------------------------------------------------------------------------------------------------------|--------------------------------------------------------------------------------------------|-----------------------------------------------------------------------|----------------------------------------------------------------------------------------------------------------------------------------------------------------------------------------------|
|                                            |                         | COVID-19 by RT-PCR tests and who were older than 18 years, and meeting COVID-19 cytokine storm (CCS) criteria.<br><br>N= 5,776                                                                                                                                                          | Male: 3702 (64.1%)<br>Female: 2075 (35.9%)                                                                                                                               |                                                                                            |                                                                       |                                                                                                                                                                                              |
| Palaiodimos<br>2020<br>USA<br>(259)        | Retrospective<br>cohort | First 200 patients who presented to the emergency room and were admitted to the inpatient medicine service or the intensive care unit at the Montefiore Medical Center in the Bronx, New York with laboratory-confirmed COVID-19.<br><br>N= 200                                         | Median age: 64 years<br>IQR: 50-73.5<br><br>Male: 98 (49%)<br>Female: 102 (51%)                                                                                          | Admission<br>between March<br>09- March 22,<br>2020 followed<br>up until April 12,<br>2020 | Per year and per<br>quartiles (results<br>shown for per<br>year only) | In-hospital mortality<br><br>Medical records                                                                                                                                                 |
| Patel <sup>‡</sup><br>2020<br>USA<br>(261) | Retrospective<br>cohort | Adult patients 18 years or older hospitalized with COVID-19 in one of ten hospitals affiliated with Northwestern Medicine in Chicagoland, with or without anticoagulation treatment. They were discharged or died during study period.<br><br>N=1716                                    | Age distribution<br>18-44 yrs.: 22.1%<br>45- 59 yrs.: 29.6%<br>60-69 yrs.: 21.6%<br>70-79 yrs.: 14.1%<br>>80 yrs.: 12.6%<br><br>Male: 935 (54.5%)<br>Female: 781 (45.5%) | March 9- June<br>26, 2020                                                                  | 18-44 yrs.<br>45- 59 yrs.<br>60-69 yrs.<br>70-79 yrs.<br>>80 yrs.     | In-hospital mortality<br>Mechanical ventilation<br>Death in critical illness<br><br>Data extracted from<br>Northwestern University<br>Enterprise Data Warehouse<br>(NUEDW) (medical records) |
| Perez-Guzman<br>2020<br>UK<br>(262)        | Retrospective<br>cohort | All admission with RT-PCR-positive SARS-CoV-2 infection to the Imperial College Healthcare National Health Service Trust (ICHNT), one of the largest hospital trusts in England serving North West London.<br><br>N= 559 with completed outcomes (death or discharge) until May 1, 2020 | Median age: 69 years<br>IQR: 54-79 years<br><br>Male: 382 (62%)<br>Female: 232 (38%)                                                                                     | February 25-<br>April 5, 2020<br>followed up until<br>May 1, 2020                          | Per year                                                              | In-hospital mortality<br><br>Hospital records                                                                                                                                                |
| Petrilli<br>2020<br>USA<br>(263)           | Prospective cohort      | Patients with all data available (besides age and sex) with positive RT-PCT test for SARS-CoV-2, containing four acute care hospitals (two in Manhattan, one in Brooklyn, and one in Long Island).<br><br>N= 5279 (positive test)<br>N= 2741 (hospitalized)                             | Median age: 54 years<br>IQR: 38-66 years<br><br>Men: 2615 (49.5%)<br>Women: 2674 (50.5%)                                                                                 | March 1-April 8,<br>2020, followed<br>up until May 5,<br>2020                              | 19-44 yrs.<br>45-54 yrs.<br>55-64 yrs.<br>65-74 yrs.<br>≥75 yrs.      | Hospital admission<br>In-hospital mortality (discharge<br>to hospice or death)<br><br>Electronic health records.                                                                             |

| Author, Year<br>Country<br>(Ref)      | Study<br>Design         | Population<br>Sampling<br>Participants                                                                                                                                                                                                                                                                                                                                                              | Age/Sex Characteristics                                                                                                                                                                                                                   | Time period of<br>study                                            | Age categories<br>used                                                                                                               | Outcome<br><br>Outcome ascertainment                                                                                                                   |
|---------------------------------------|-------------------------|-----------------------------------------------------------------------------------------------------------------------------------------------------------------------------------------------------------------------------------------------------------------------------------------------------------------------------------------------------------------------------------------------------|-------------------------------------------------------------------------------------------------------------------------------------------------------------------------------------------------------------------------------------------|--------------------------------------------------------------------|--------------------------------------------------------------------------------------------------------------------------------------|--------------------------------------------------------------------------------------------------------------------------------------------------------|
| Price-Haywood<br>2020<br>USA<br>(266) | Retrospective<br>cohort | Patients seen at an Ochsner Health facility in Louisiana, who tested positive for SARS-CoV-2 on PCR assay and identified themselves as white non-hispanic or as black non-hispanic. Excluded were those with any other ethnicity.<br><br>N= 3481 (for hospitalization)<br>N = 1382 (for in-hospital mortality)                                                                                      | Mean age (SD)<br>White non-hispanic<br>55.5 yrs (18.5)<br>Black non-hispanic<br>53.6 yrs. (16.1)<br><br>White non-hispanic<br>Male: 471 (45.7%)<br>Female: 559 (54.3%)<br>Black non-hispanic<br>Male: 923 (37.7%)<br>Female: 1528 (62.3%) | March 1- April<br>11, 2020<br>followed<br>through May 7,<br>2020   | Age, per 5-year<br>units                                                                                                             | Hospitalization<br>ICU<br>In-hospital mortality<br><br>Electronic medical record<br>system.                                                            |
| Reilev<br>2020<br>Denmark<br>(269)    | Retrospective<br>cohort | People in the Danish population who tested positive for SARS-CoV-2 via PCR tests, whose results were in the Danish Microbiology Database. A unique personal identifier assigned to all Danish citizens was used to link to health registries for information.<br><br>N= 11,122 (positive cases, for hospitalization, death within 30 days)<br>N= 2254 hospitalized (for ICU, in-hospital mortality) | Positive cases:<br>Median age: 48 yrs.<br>IQR: 33-62 yrs.<br><br>Men: 4692 (42%)<br>Women: 6430 (58%)                                                                                                                                     | February 27-<br>May 19, 2020                                       | 0-9 yrs.<br>10-19 yrs.<br>20-29 yrs.<br>30-39 yrs.<br>40-49 yrs.<br>50-59 yrs.<br>60-69 yrs.<br>70-79 yrs.<br>80-89 yrs.<br>90+ yrs. | Hospitalization<br>Mortality (population-based)<br>In-hospital mortality<br><br>Danish administrative and<br>health registries.                        |
| Rentsch<br>2020<br>USA<br>(270)       | Retrospective<br>cohort | Members of the VA Birth Cohort aged 54 to 75 years with a laboratory confirmed positive SARS-CoV-2/Covid-19 nasopharyngeal swab (1% were from other sources) result.<br><br>N=3789<br>N=585 (positive cases, for hospitalization and ICU)                                                                                                                                                           | Median age: 66.1 yrs.<br>IQR: 60.4-71 yrs.<br><br>Male: 27 (4.6 %)<br>Female: 558 (95.4 %)                                                                                                                                                | February 8 -<br>March 30, 2020                                     | Age, per 5-year<br>increase                                                                                                          | Hospitalization<br>ICU<br><br>Electronic health record data<br>from Veterans Affairs<br>Healthcare System/Veterans<br>Health Administration            |
| Rossi<br>2020<br>Italy<br>(274)       | Retrospective<br>cohort | All symptomatic patients who tested positive with PCR in the province of Reggio Emilia registered in a special dedicated SARS-CoV-2 database. Asymptomatic cases excluded.<br><br>N= 2653                                                                                                                                                                                                           | Median age: 63.2 yrs.<br><br>Male: 1328 (50,1 %)<br>Female: 1325 (49,9 %)                                                                                                                                                                 | February 27-<br>April 2, 2020-<br>assessed until<br>April 3, 2020. | <51 yrs.<br>51-60 yrs.<br>61-70 yrs.<br>71-80 yrs.<br>≥81 yrs.                                                                       | Hospitalization<br>Death (population-based)<br><br>Data obtained through<br>routinely available<br>administrative databases of the<br>Health Authority |

| Author, Year<br>Country<br>(Ref)  | Study<br>Design               | Population<br>Sampling<br>Participants                                                                                                                                                                                                                                                                | Age/Sex Characteristics                                                                                                      | Time period of<br>study                                                                           | Age categories<br>used                           | Outcome<br><br>Outcome ascertainment                                                                                |
|-----------------------------------|-------------------------------|-------------------------------------------------------------------------------------------------------------------------------------------------------------------------------------------------------------------------------------------------------------------------------------------------------|------------------------------------------------------------------------------------------------------------------------------|---------------------------------------------------------------------------------------------------|--------------------------------------------------|---------------------------------------------------------------------------------------------------------------------|
| Salacup<br>2020<br>USA<br>(277)   | Retrospective<br>cohort       | All patients older than 18 years old with a confirmed diagnosis of COVID-19 via RT-PCR diagnosis presenting at the Einstein Medical Center in Philadelphia. Included data for patients with definite outcome (discharge or death)<br>N= 242                                                           | Median age: 66 yrs.<br>IQR: 58-76 yrs.<br><br>Male: 93 (51%)<br>Female: 119 (49%)                                            | March 1- April<br>24, 2020                                                                        | Per year                                         | In-hospital mortality                                                                                               |
| Sapey<br>2020<br>England<br>(279) | Retrospective<br>cohort       | All patients with a confirmed positive SARS-CoV-2 swab (nasopharyngeal and oropharyngeal) result admitted to the University Hospitals Birmingham NHS Foundation Trust at the time or up to 2 weeks following their first positive test. Not specified if lateral flow test or PCR test.<br><br>N=2169 | Median age: 73 yrs.<br>IQR: 58-84 yrs.<br><br>Male: 1290 (58.2%)<br>Female: 927 (41.8%)                                      | March 10- April<br>17, 2020<br>assessed on May<br>12, 2020                                        | z-score                                          | In-hospital mortality<br><br>Electronic health records                                                              |
| Seiglie<br>2020<br>USA<br>(280)   | Prospective cohort            | Patients presenting to care with COVID-19 symptoms and who were subsequently hospitalized at Massachusetts General Hospital (MGH) with PCR confirmed SARS-CoV-2 infection.<br><br>N=450                                                                                                               | Mean age (SD)<br>No diabetes: 61.1 yrs. (18.8)<br>Diabetes: 66.7 yrs. (14.2)<br><br>Male: 259 (57.6%)<br>Female: 191 (42.4%) | March 11- April<br>30, 2020<br>followed up for<br>14 days from<br>date of initial<br>presentation | <50 yrs.<br>50-59 yrs.<br>60-69 yrs.<br>≥70 yrs. | 14-day ICU admission<br>14-day mechanical ventilation<br>14-day in-hospital mortality<br><br>COVID-19 data registry |
| Shah<br>2020<br>USA<br>(281)      | Retrospective<br>cohort       | All hospitalized patients in Phoebe Putney Health System in Southwest Georgia, with confirmed COVID-19 through a PCR test and a definite outcome<br><br>N= 522                                                                                                                                        | Median age: 63 yrs.<br>IQR: 50-72 yrs.<br><br>Male: 218 (41.8%)<br>Female: 304 (58.2%)                                       | March 2- May 6,<br>2020<br>Assessed on May<br>6, 2020                                             | <65 yrs.<br>≥65 yrs.                             | In-hospital mortality<br><br>Electronic medical records                                                             |
| Shi†<br>2020<br>China<br>(285)    | Retrospective<br>cohort study | Consecutive patients admitted to Renmin Hospital of Wuhan University in Wuhan with laboratory-confirmed COVID-19 using RT-PCR tests. Patients were excluded if they did not have cardiac biomarkers (N= 229 excluded).<br><br>N= 416                                                                  | Median age: 64 yrs.<br>Range: 21-95 yrs,<br><br>Male: 205 (49.3%)<br>Female: 211 (50.7%)                                     | January 20-<br>February 10,<br>2020<br>followed up<br>February 15<br>2020 (mortality)             | Per year                                         | In-hospital mortality<br><br>Electronic medical records                                                             |
| Soares<br>2020<br>Brazil<br>(293) | Retrospective<br>cohort       | All patients diagnosed with a RT-PCR or serological test, or if they were a suspected case that previously came into close contact or resided with someone with a confirmed laboratory diagnosis in the state of                                                                                      | Age distribution<br><60 yrs.: 8676 (81.0%)<br>≥60 yrs. 2037 (19.0%)                                                          | February 29-<br>June 11, 2020<br>Assessed on<br>June 11, 2020                                     | <60 yrs.<br>≥60 yrs.                             | Hospitalization due to COVID-19                                                                                     |

| Author, Year<br>Country<br>(Ref) | Study<br>Design         | Population<br>Sampling<br>Participants                                                                                                                                                                                                                                                                      | Age/Sex Characteristics                                                                  | Time period of<br>study                                                        | Age categories<br>used                                                                                                                              | Outcome<br><br>Outcome ascertainment                                                                                                                                                                                                                                                                                                   |
|----------------------------------|-------------------------|-------------------------------------------------------------------------------------------------------------------------------------------------------------------------------------------------------------------------------------------------------------------------------------------------------------|------------------------------------------------------------------------------------------|--------------------------------------------------------------------------------|-----------------------------------------------------------------------------------------------------------------------------------------------------|----------------------------------------------------------------------------------------------------------------------------------------------------------------------------------------------------------------------------------------------------------------------------------------------------------------------------------------|
|                                  |                         | Espíritu Santo, with complete data for predictive variables.<br><br>N= 10,713                                                                                                                                                                                                                               |                                                                                          |                                                                                |                                                                                                                                                     | Health Secretariat of Espiritu Santo state                                                                                                                                                                                                                                                                                             |
| Solís<br>2020<br>Mexico<br>(294) | Retrospective<br>cohort | 7497 patients who tested positive for COVID-19 in Mexico, a subset of a larger dataset of 49167 patients with COVID-19 related symptoms who sought attention in medical units and were tested with positive, negative and pending results.<br><br>N=7497                                                    | Median age: 46 yrs.<br><br>Male: 4341 (57.9%)<br>Female: 3156 (42.1%)                    | Until April 18,<br>2020                                                        | 0-24 yrs.<br>25-29 yrs.<br>30-34 yrs.<br>35-39 yrs.<br>40-44 yrs.<br>45-49 yrs.<br>50-54 yrs.<br>55-59 yrs.<br>60-64 yrs.<br>65-69 yrs.<br>70+ yrs. | Population-based mortality at 35 days<br><br>Information about patients is reported on a daily basis to the Secretaría de Salud and released by the Mexican Ministry of Health.                                                                                                                                                        |
| Sousa<br>2020<br>Brazil<br>(295) | Retrospective<br>cohort | People that presented flu-like syndrome in Fortaleza (Ceará's capital city) and tested positive for Covid-19. Only people that needed medical assistance and went to healthcare services were tested; from those, moderate and severe cases were hospitalized and received health assistance.<br><br>N=2070 | Median age: 44 yrs.<br>IQR: 34-59 yrs.<br><br>Male: 1017 (49.1%)<br>Female: 1053 (50.9%) | Until April 14,<br>2020 (endpoint)                                             | <60 yrs.<br>≥60 yrs.                                                                                                                                | Population-based mortality<br><br>Data were obtained by using IntegraSUS data, a free-access website that holds daily updated data and indicators of Covid-19 in the Ceará State.<br><br>The cause of death was determined by the physician given positive laboratory tests to COVID-19 and the clinical manifestation of the disease. |
| Suleyman<br>2020<br>USA<br>(296) | Retrospective<br>cohort | Adult patients hospitalized at Henry Ford Health System (HFHS), a 5-hospital system that serves metropolitan Detroit, and diagnosed with COVID-19. Laboratory-confirmed SARS-CoV-2 infection by PCR test.<br><br>N=355 hospital admission                                                                   | Mean age (SD):<br>61.4 yrs. (15.4 yrs.)<br><br>Male: 165 (46.5%)<br>Female: 190 (53.5%)  | March 9 - March<br>27, 2020, clinical<br>outcomes<br>monitored for 30<br>days. | <60 yrs.<br>>60 yrs.                                                                                                                                | ICU<br>Mechanical ventilation<br><br>Data were obtained from electronic health records on a standardized data collection form.                                                                                                                                                                                                         |



| Author, Year<br>Country<br>(Ref)   | Study<br>Design         | Population<br>Sampling<br>Participants                                                                                                                                                                                                                                                                                                                                                | Age/Sex Characteristics                                                                                                                                                                                | Time period of<br>study                                                                                              | Age categories<br>used                                                        | Outcome<br><br>Outcome ascertainment                                                                  |
|------------------------------------|-------------------------|---------------------------------------------------------------------------------------------------------------------------------------------------------------------------------------------------------------------------------------------------------------------------------------------------------------------------------------------------------------------------------------|--------------------------------------------------------------------------------------------------------------------------------------------------------------------------------------------------------|----------------------------------------------------------------------------------------------------------------------|-------------------------------------------------------------------------------|-------------------------------------------------------------------------------------------------------|
| Tai<br>2020<br>China<br>(299)      | Retrospective<br>cohort | Admitted patients to Wuchang temporary hospital with laboratory-confirmed COVID-19, but having mild COVID-19. Critical patients were transferred to other hospitals for ICU care. (RT-PCR) test.<br><br>N= 332                                                                                                                                                                        | Median age: 51 yrs.<br>IQR: 40-59 yrs.<br><br>Male: 132 (39.8%)<br>Female: 200 (61.2%)                                                                                                                 | February 5 -<br>March 10, 2020<br>followed until<br>March 25, 2020                                                   | Per year                                                                      | ICU (for mild COVID-19)<br><br>Electronic medical records.                                            |
| Tartof<br>2020<br>USA<br>(300)     | Retrospective<br>cohort | All Kaiser Permanente Southern California (KPSC) members with 6-month continuous membership and diagnosed with COVID-19 by diagnostic codes or positive laboratory test results (82%). Pregnant women were excluded. ):KPSC is an integrated health care organization located throughout 9 counties in Southern California with more than 4.7 million members.<br><br>N=6916          | Mean age (SD):<br>49.1 yrs. (16.6 yrs.)<br><br>Median age: 49 yrs.<br>IQR: 36-60 yrs.<br><br>Male: 3111 (44.98%)<br>Female: 3805 (55.02%)                                                              | February 13 -<br>May 2, 2020, last<br>date patient was<br>enrolled was set<br>to 21 days<br>before study<br>date end | 0-40 yrs.<br>41-50 yrs.<br>51-60 yrs.<br>61-70 yrs.<br>71-80 yrs.<br>>80 yrs. | Population-based mortality<br>(within 21 days)<br><br>Electronic health records.                      |
| van Gerwen<br>2020<br>USA<br>(301) | Retrospective<br>cohort | All patients 18 years or older with laboratory-confirmed diagnosis (hospitalized and ambulatory) identified via a large New York City health system with sufficient clinical documentation available or accessible, including confidential patient records.<br><br>Laboratory-confirmed diagnosis of COVID-19 by a RT-PCR test<br><br>N=3703 (all patients)<br>N= 2015 (hospitalized) | Mean age (SD):<br>56.8 yrs. (18.2 yrs.)<br><br>Male: 2049 (55.3%)<br>Female: 1654 (44.7%)                                                                                                              | March 1 2020 –<br>April 1, 2020<br>followed until<br>May 13, 2020 (6<br>weeks)                                       | 18-40 yrs.<br>40-60 yrs.<br>>60 yrs.                                          | Hospitalization<br>Mechanical ventilation<br>In-hospital mortality<br><br>Electronic medical records. |
| Wang<br>2020<br>USA<br>(302)       | Retrospective<br>cohort | All confirmed COVID-19 patients within the Mount Sinai Health System (MSHS) in New York City. MSHS is the largest integrated healthcare delivery system in the New York City metropolitan region serving 3499000 million outpatients and 152520 inpatients annually.<br><br>Confirmed diagnosis of SARS-CoV-2 by lab tests (not specified).                                           | Age, without comorbidity N<br>(%):<br><18 yrs: 39 (76%)<br>18-39 yrs: 1315 (85%)<br>40-49 yrs: 709 (75%)<br>50-59 yrs: 841 (64%)<br>60-69 yrs: 830 (52%)<br>70-79 yrs: 510 (45%)<br>80+ yrs: 472 (46%) | Until April 15,<br>2020                                                                                              | <40 yrs.<br>40-49 yrs.<br>50-59 yrs.<br>60-69 yrs.<br>70-79 yrs.<br>80+ yrs.  | Population-based mortality<br><br>Electronic health records.                                          |

| Author, Year<br>Country<br>(Ref)                                                                                                                                                                                                                                                                                                                                                                                                                                                                | Study<br>Design         | Population<br>Sampling<br>Participants                                                                                                                                                                                                                                         | Age/Sex Characteristics                                                                                                                                                                                                                           | Time period of<br>study                                            | Age categories<br>used                             | Outcome<br><br>Outcome ascertainment                                                                               |
|-------------------------------------------------------------------------------------------------------------------------------------------------------------------------------------------------------------------------------------------------------------------------------------------------------------------------------------------------------------------------------------------------------------------------------------------------------------------------------------------------|-------------------------|--------------------------------------------------------------------------------------------------------------------------------------------------------------------------------------------------------------------------------------------------------------------------------|---------------------------------------------------------------------------------------------------------------------------------------------------------------------------------------------------------------------------------------------------|--------------------------------------------------------------------|----------------------------------------------------|--------------------------------------------------------------------------------------------------------------------|
|                                                                                                                                                                                                                                                                                                                                                                                                                                                                                                 |                         | N=7592                                                                                                                                                                                                                                                                         | Age, with comorbidity N (%):<br><18 yrs: 12 (24%)<br>18-39 yrs: 224 (15%)<br>40-49 yrs: 234 (25%)<br>50-59 yrs: 465 (36%)<br>60-69 yrs: 753 (48%)<br>70-79 yrs: 627 (55%)<br>80+ yrs: 564 (54%)<br><br>Male: 4165 (54.9%)<br>Female: 3427 (45.1%) |                                                                    |                                                    |                                                                                                                    |
| Wang<br>2020<br>China<br>(305)                                                                                                                                                                                                                                                                                                                                                                                                                                                                  | Retrospective<br>cohort | All confirmed cases of COVID-19 over 60 years old admitted at isolation ward of Renmin Hospital of Wuhan University.<br>Laboratory-confirmed SARS-CoV-2 nucleic acid by RT-PCR test.<br>N=339                                                                                  | Median age: 69 yrs.<br>IQR: 65-76 yrs.<br><br>Male: 166 (49%)<br>Female: 173 (51%)                                                                                                                                                                | January 1 –<br>February 6, 2020<br>followed until<br>March 5, 2020 | Per year                                           | In-hospital mortality in patients<br>over 60 yrs. old<br><br>Data were obtained from<br>patient's medical records. |
| Yehia<br>2020<br>USA<br>(312)                                                                                                                                                                                                                                                                                                                                                                                                                                                                   | Retrospective<br>cohort | Adults (18 years or older) with laboratory-confirmed SARS-CoV-2 infection by PCR hospitalized at one of 92 Ascension hospitals (located in 12 states).<br><br>N=7139                                                                                                           | Median age: 68 yrs.<br>IQR: 56-79 yrs.<br><br>Male: 3664 (51.3%)<br>Female: 3470 (48.6%)                                                                                                                                                          | February 19 -<br>May 31, 2020<br>followed until<br>June 25, 2020   | 18-49 yrs.<br>50-64 yrs.<br>65-84 yrs.<br>≥85 yrs. | In-hospital mortality<br><br>Electronic health records and<br>administrative data.                                 |
| Zhao†<br>2020<br>China<br>(319)                                                                                                                                                                                                                                                                                                                                                                                                                                                                 | Retrospective<br>cohort | COVID-19 patients admitted to both the Shouyi and East districts of Renmin Hospital of Wuhan University.<br><br>Laboratory-confirmed diagnosis of SARS-CoV-2 by positive nucleic acid test and sequencing of viral genes, highly homologous to known SARS-CoV-2.<br><br>N=1000 | Median age: 61 yrs.<br>IQR: 46-70 yrs.<br><br>Male: 466 (46.6%)<br>Female: 534 (53.4%)                                                                                                                                                            | January 1 -<br>February 14,<br>2020                                | <60 yrs.<br>60-75 yrs.<br>≥75 yrs.                 | In-hospital mortality<br><br>Hospital's medical record<br>system.                                                  |
| †, ††, ‡, *, ** Studies marked with same symbol have the same population or a sub-group of the same population<br>IQR: interquartile range; yrs.: years; reverse-transcriptase polymerase chain reaction: RT-PCR; ICU: intensive care unit; COPD: chronic obstructive pulmonary disease; BMI: body mass index; yrs.: years;<br>SOFA score: sequential organ failure assessment score; OR: odds ratio; HR: hazards ratio; CI: confidence intervals; NA: not available; IQR: inter-quartile range |                         |                                                                                                                                                                                                                                                                                |                                                                                                                                                                                                                                                   |                                                                    |                                                    |                                                                                                                    |

Table S3. Results of studies investigating in-hospital mortality

| Author, Year (Ref)        | Confounders and age-dependent risk factors used in the model                                                                                                                                                                                                                                                                      | Type of analysis # cases / # non-cases                            | N in analysis Total deaths In age group: # cases/total                                                                                                                                | Results Unadjusted effect estimates (if available)    | Results Adjusted effect estimates                                                                                                                                                                                                                                |
|---------------------------|-----------------------------------------------------------------------------------------------------------------------------------------------------------------------------------------------------------------------------------------------------------------------------------------------------------------------------------|-------------------------------------------------------------------|---------------------------------------------------------------------------------------------------------------------------------------------------------------------------------------|-------------------------------------------------------|------------------------------------------------------------------------------------------------------------------------------------------------------------------------------------------------------------------------------------------------------------------|
| Antwi-Amoabeng 2020 (165) | Sex, ethnicity (Hispanic), diabetes, hypertension, obesity, chronic kidney disease, COPD, ICU stay                                                                                                                                                                                                                                | Logistic regression                                               | N= 172<br>Deaths: 18 (10.5%)<br>Age ≤61 yrs.: NA<br>Age>61 yrs.: NA                                                                                                                   | NA                                                    | Mortality (in hospital) OR (95% CI)<br>Age ≤61 yrs.: Reference<br>Age>61 yrs.: 5.63 (0.41-77.51)                                                                                                                                                                 |
| Argenziano 2020 (166)     | Sex, BMI, smoking, coronary artery disease, congestive heart failure, history of stroke, diabetes mellitus, hypertension, cirrhosis, HIV, inflammatory bowel disease, pulmonary disease, renal disease, viral hepatitis, active malignancy, transplant history, rheumatological disease, immunosuppressed state, no comorbidities | Cox proportional hazards analysis only with complete data (n=841) | N= 1000<br>Deaths: 211 (21%)                                                                                                                                                          | NA                                                    | In-hospital mortality HR (95% CI)<br>Age (per year): 1.07 (1.05-1.08)                                                                                                                                                                                            |
| Baqui 2020 (168)          | Sex, ethnicity (black, Pardo, East Asian), neurological disease, obesity, pulmonary disease, renal disease, diabetes, immunosuppression, liver disease, cardiovascular disease, asthma                                                                                                                                            | Mixed-effects Cox regression                                      | N= 6882<br>Deaths: 3254<br><40 yrs.: NA<br>40-50 yrs.: NA<br>50-60 yrs.: NA<br>60-70 yrs.: NA<br>≥70 yrs.: NA                                                                         | NA                                                    | In-hospital mortality HR (95% CI)<br><40 yrs.: Reference<br>40-50 yrs.: 1.19 (1.00-1.43)<br>50-60 yrs.: 1.59 (1.34-1.87)<br>60-70 yrs.: 2.06 (1.76-2.41)<br>≥70 yrs.: 3.02 (2.59-3.52)                                                                           |
| Boulle 2020 (176)         | Sex, diabetes, hypertension, chronic kidney disease, chronic pulmonary disease/asthma, tuberculosis, HIV, antiretroviral therapy, CD4 count during COVID-19                                                                                                                                                                       | Cox proportional hazards model                                    | Hospitalized public-sector SARS-CoV-2 cases<br>N= 2,978<br>Deaths: 550<br>20-39 yrs.: 45/849<br>40-49 yrs.: 56/528<br>50-59 yrs.: 142/665<br>60-69 yrs.: 158/518<br>≥70 yrs.: 149/418 | NA                                                    | In-hospital mortality HR (95% CI)<br>Hospitalized public-sector SARS-CoV-2 cases (in-hospital mortality)<br>20-39 yrs.: Reference<br>40-49 yrs.: 1.83 (1.23-2.72)<br>50-59 yrs.: 3.81 (2.68-5.42)<br>60-69 yrs.: 6.11 (4.27-8.75)<br>≥70 yrs.: 7.53 (5.23-10.84) |
| Burn 2020 (177)           | Autoimmune condition, chronic kidney disease, COPD, dementia, heart disease, hyperlipidemia, hypertension,                                                                                                                                                                                                                        | Cox proportional hazards model using a non-linear                 | N= 16,901<br>Deaths: 2692<br>>18 yrs.: <5/74<br>18-39 yrs.: 11/1276                                                                                                                   | In-hospital mortality HR (95% CIs)<br>Age only model: | In-hospital mortality HR (95% CIs)<br>Age and comorbidity model:<br>20-24 yrs.: 0.072 (0.028 to 0.19)                                                                                                                                                            |

| Author, Year (Ref)             | Confounders and age-dependent risk factors used in the model                                                                                                                                            | Type of analysis # cases / # non-cases                                            | N in analysis Total deaths In age group: # cases/total                                         | Results Unadjusted effect estimates (if available)                                                                                                                                                                                                                                                                                                                                                                                                                                                                                                                        | Results Adjusted effect estimates                                                                                                                                                                                                                                                                                                                                                                                                                                                                                                 |
|--------------------------------|---------------------------------------------------------------------------------------------------------------------------------------------------------------------------------------------------------|-----------------------------------------------------------------------------------|------------------------------------------------------------------------------------------------|---------------------------------------------------------------------------------------------------------------------------------------------------------------------------------------------------------------------------------------------------------------------------------------------------------------------------------------------------------------------------------------------------------------------------------------------------------------------------------------------------------------------------------------------------------------------------|-----------------------------------------------------------------------------------------------------------------------------------------------------------------------------------------------------------------------------------------------------------------------------------------------------------------------------------------------------------------------------------------------------------------------------------------------------------------------------------------------------------------------------------|
|                                | malignant neoplasm, obesity, Type 2 diabetes, Charlson Index                                                                                                                                            | relationship with age                                                             | 40-59 yrs.: 142/5217<br>60-69 yrs.: 292/3231<br>70-79 yrs.: 822/3764<br>≥80 yrs.: 1424/3339    | 20-24 yrs.: 0.052 (0.02 to 0.14)<br>25-29 yrs.: 0.066 (0.03 to 0.15)<br>30-34 yrs.: 0.084 (0.045 to 0.16)<br>35-39 yrs.: 0.11 (0.068 to 0.17)<br>40-44 yrs.: 0.14 (0.099 to 0.19)<br>45-49 yrs.: 0.18 (0.14 to 0.23)<br>50-54 yrs.: 0.25 (0.20 to 0.31)<br>55-59 yrs.: 0.37 (0.30 to 0.44)<br>60-64 yrs.: 0.59 (0.54 to 0.65)<br>65-69 yrs.: Reference<br>70-74 yrs.: 1.69 (1.61 to 1.78)<br>75-79 yrs.: 2.75 (2.47 to 3.06)<br>80-84 yrs.: 4.16 (3.64 to 4.75)<br>85-89 yrs.: 5.93 (5.23 to 6.73)<br>90-94 yrs.: 8.28 (7.34 to 9.34)<br>95+ yrs.: 11.53 (10.10 to 13.17) | 25-29 yrs.: 0.088 (0.041 to 0.19)<br>30-34 yrs.: 0.11 (0.059 to 0.20)<br>35-39 yrs.: 0.13 (0.086 to 0.21)<br>40-44 yrs.: 0.17 (0.12 to 0.23)<br>45-49 yrs.: 0.21 (0.16 to 0.27)<br>50-54 yrs.: 0.28 (0.22 to 0.35)<br>55-59 yrs.: 0.40 (0.34 to 0.49)<br>60-64 yrs.: 0.63 (0.58 to 0.69)<br>65-69 yrs.: Reference<br>70-74 yrs.: 1.54 (1.46 to 1.62)<br>75-79 yrs.: 2.25 (2.01 to 2.52)<br>80-84 yrs.: 3.15 (2.74 to 3.62)<br>85-89 yrs.: 4.25 (3.71 to 4.88)<br>90-94 yrs.: 5.68 (4.97 to 6.50)<br>95+ yrs.: 7.58 (6.53 to 8.81) |
| Carter and Collins* 2020 (181) | Location infection acquired, sex, smoking status, C-reactive protein, diabetes, coronary artery diseases, hypertension, reduced renal function, clinical frailty scale                                  | Mortality: mixed-effects multivariable Cox proportion baseline hazards regression | N= 1564<br>Deaths: 425 (27.2%)<br><65 yrs.: 55/488<br>65-79 yrs.: 168/535<br>>80 yrs.: 202/541 | In-hospital mortality HR (95% CI)<br><65 yrs.: Reference<br>65-79 yrs.: 3.30 (2.40-4.55)<br>>80 yrs.: 4.05 (2.95-5.57)                                                                                                                                                                                                                                                                                                                                                                                                                                                    | In-hospital mortality HR (95% CI)<br><65 yrs.: Reference<br>65-79 yrs.: 2.70 (1.91-3.81)<br>>80 yrs.: 3.30 (2.28-4.78)                                                                                                                                                                                                                                                                                                                                                                                                            |
| Chen and Bai 2020 (184)        | Sex, hypertension (for overall analysis and for male only stratified analysis), cardiovascular disease, cerebrovascular disease, malignancy, chronic kidney disease, COPD, days from onset to admission | Logistic regression                                                               | N= 3309<br>Deaths: 307 (9.3%)<br>≤45 yrs.: NA<br>>45 yrs.: NA                                  | In-hospital mortality OR (95% CI)<br>Overall<br>≤ 45 yrs.: Reference<br>> 45 yrs.: 8.37 (4.43-15.81)<br>Women<br>≤ 45 yrs.: 0.32 (0.15-0.70)<br>> 45 yrs.: Reference<br>Men<br>≤ 45 yrs.: 0.04 (0.01-0.38)<br>> 45 yrs.: Reference                                                                                                                                                                                                                                                                                                                                        | In-hospital mortality OR (95% CI)<br>Overall<br>≤ 45 yrs.: Reference<br>> 45 yrs.: 9.08 (4.44-18.59)<br>Women<br>≤ 45 yrs.: 0.29 (0.12-0.67)<br>> 45 yrs.: Reference<br>Men<br>≤ 45 yrs.: 0.04 (0.01-0.16)<br>> 45 yrs.: Reference                                                                                                                                                                                                                                                                                                |
| Chilimuri 2020                 | Sex, hypertension, diabetes, cardiovascular disease, chronic kidney disease, absolute neutrophil count,                                                                                                 | Multiple regression analysis (not specified)                                      | N= 375<br>Deaths: 160 (43%)                                                                    | In-hospital mortality                                                                                                                                                                                                                                                                                                                                                                                                                                                                                                                                                     | In-hospital mortality OR (95% CI)<br>Per year: 1.04 (1.01-1.06)                                                                                                                                                                                                                                                                                                                                                                                                                                                                   |

| Author, Year<br>(Ref)                | Confounders and age-dependent risk factors used in the model                                                                                                                                    | Type of analysis<br># cases / # non-cases                                                                                                               | N in analysis<br>Total deaths<br>In age group: # cases/total                                                                                 | Results<br>Unadjusted effect estimates (if available)                                                                                                                                                            | Results<br>Adjusted effect estimates                                                                                                                                                                          |
|--------------------------------------|-------------------------------------------------------------------------------------------------------------------------------------------------------------------------------------------------|---------------------------------------------------------------------------------------------------------------------------------------------------------|----------------------------------------------------------------------------------------------------------------------------------------------|------------------------------------------------------------------------------------------------------------------------------------------------------------------------------------------------------------------|---------------------------------------------------------------------------------------------------------------------------------------------------------------------------------------------------------------|
| (187)                                | absolute lymphocyte count, lactate dehydrogenase, C-reactive protein, D-dimer, ferritin                                                                                                         |                                                                                                                                                         |                                                                                                                                              | Per year: OR= 1.05 (95% CI: 1.03-1.73)                                                                                                                                                                           |                                                                                                                                                                                                               |
| Ciardullo 2020<br>(188)              | Sex, diabetes, hypertension, chronic kidney disease, cardiovascular disease, COPD                                                                                                               | Binomial logistic regression                                                                                                                            | N=371 (339 for analysis due to missing data)<br>Deaths: 142 (38.1%)                                                                          | In-hospital mortality                                                                                                                                                                                            | In-hospital mortality OR (95% CI)<br>Per year: 1.065 (1.029-1.086)                                                                                                                                            |
| Conversano and Melillo 2020<br>(190) | COPD, cancer, chronic kidney disease, beta blocker                                                                                                                                              | Cox regression analysis                                                                                                                                 | N=191<br>Deaths: 42 (22%)                                                                                                                    | In-hospital mortality<br>Per year: HR = 1.1 (1.0–1.2)                                                                                                                                                            | In-hospital mortality HR (95% CI)<br>Per year: 1.1 (1.0-1.1)                                                                                                                                                  |
| Cummings 2020<br>(193)               | Sex, symptom duration before hospital presentation, hypertension, chronic cardiac disease, COPD or interstitial lung disease, diabetes, interleukin-6, D-dimer                                  | Cox proportional hazards model                                                                                                                          | N=257<br>Deaths: 101 (39%)                                                                                                                   | In-hospital mortality among critically ill patients HR (95% CI)<br><br>Per 10-year increase: 1.49 (1.29–1.73)<br>Per yr. increase (own calculations): 1.04 (1.03-1.06)                                           | In-hospital mortality among critically ill patients HR (95% CI)<br><br>Per 10-year increase: 1.31 (1.09-1.57)<br>Per yr. increase (own calculations): 1.03 (1.01-1.05)                                        |
| Di Castelnuovo 2020<br>(197)         | Gender, hypertension, diabetes, myocardial infarction, heart failure, cancer, lung disease, obesity, smoking, CRP, eGFR/chronic kidney disease stage                                            | Cox proportional hazards regression models with multiple imputation. Several sensitivity analyses on multiple imputations and accounting for clustering | N=3894<br>Deaths: 712 (18.3%)<br>18-44 yrs.: 6/348<br>45-64 yrs.: 75/1413<br>65-74 yrs.: 145/808<br>75-84 yrs.: 266/849<br>85+ yrs.: 220/476 | In-hospital mortality (main analysis)<br>HR (95% CI)<br>18-44 yrs.: Reference<br>45-64 yrs.: 2.40 (1.04-5.51)<br>65-74 yrs.: 7.13 (3.14-16.14)<br>75-84 yrs.: 13.56 (6.03-30.52)<br>85+ yrs.: 21.65 (9.60-48.82) | In-hospital mortality (main analysis)<br>HR (95% CI)<br>18-44 yrs.: Reference<br>45-64 yrs.: 1.77 (0.84-3.71)<br>65-74 yrs.: 3.87 (2.03-7.37)<br>75-84 yrs.: 6.05 (3.17-11.55)<br>85+ yrs.: 8.24 (4.61-14.74) |
| Docherty 2020<br>(198)               | Sex at birth, chronic cardiac disease, chronic pulmonary disease, chronic kidney disease, diabetes, obesity, chronic neurological disorder, dementia, malignancy, moderate/severe liver disease | Cox proportional hazards models including geographical region as random intercept                                                                       | N= 20,133<br>Deaths: 5165 (25.7%)<br><50 yrs.: 121/2795<br>50-59 yrs.: 274/2708<br>60-69 yrs.: 662/3296<br>70-79 yrs.: 1506/4692             | In-hospital mortality HR (95% CI)<br><50 yrs.: Reference<br>50-59 yrs.: 2.55 (2.06-3.17)<br>60-69 yrs.: 5.45 (4.48-6.63)<br>70-79 yrs.: 9.76 (8.09-11.77)<br>≥80 yrs.: 13.47 (11.20-16.20)                       | In-hospital mortality HR (95% CI)<br><50 yrs.: Reference<br>50-59 yrs.: 2.63 (2.06-3.35)<br>60-69 yrs.: 4.99 (3.99-6.25)<br>70-79 yrs.: 8.51 (6.85-10.57)<br>≥80 yrs.: 11.09 (8.93-13.77)                     |

| Author, Year (Ref)    | Confounders and age-dependent risk factors used in the model                                                                                                                                                                                                                                                                                                                                                                            | Type of analysis # cases / # non-cases                                                  | N in analysis Total deaths In age group: # cases/total                                                                                                                                                                                            | Results Unadjusted effect estimates (if available)                                                                                                     | Results Adjusted effect estimates                                                                                                                                                                                                                                                                                                                                                                                                                                                                                                                  |
|-----------------------|-----------------------------------------------------------------------------------------------------------------------------------------------------------------------------------------------------------------------------------------------------------------------------------------------------------------------------------------------------------------------------------------------------------------------------------------|-----------------------------------------------------------------------------------------|---------------------------------------------------------------------------------------------------------------------------------------------------------------------------------------------------------------------------------------------------|--------------------------------------------------------------------------------------------------------------------------------------------------------|----------------------------------------------------------------------------------------------------------------------------------------------------------------------------------------------------------------------------------------------------------------------------------------------------------------------------------------------------------------------------------------------------------------------------------------------------------------------------------------------------------------------------------------------------|
|                       |                                                                                                                                                                                                                                                                                                                                                                                                                                         |                                                                                         | ≥80 yrs.: 2602/6642                                                                                                                                                                                                                               |                                                                                                                                                        |                                                                                                                                                                                                                                                                                                                                                                                                                                                                                                                                                    |
| Giacomelli 2020 (209) | Gender, age unadjusted Charlson comorbidity index, obesity, being treated with at least one anti-hypertensive agent, disease severity, presence of anaemia, lymphocyte count, D-dimer, C-reactive protein, creatinine, creatinine kinase                                                                                                                                                                                                | Cox proportional hazards                                                                | N=233<br>Deaths: 48 (20.6%)                                                                                                                                                                                                                       | In-hospital mortality HR (95% CI)<br>Age (per 10 years): 1.81 (1.44-2.28)<br>Age (per year, own calculations): 1.06 (1.04-1.09)                        | In-hospital mortality HR (95% CI)<br>Age (per 10 years): 2.08 (1.48-2.92)<br>Age (per year, own calculations): 1.08 (1.04-1.11)                                                                                                                                                                                                                                                                                                                                                                                                                    |
| Grasselli 2020 (213)  | Sex, respiratory support, hypertension, hypercholesterolemia, heart disease, type 2 diabetes, malignancy, COPD, ACE inhibitor therapy, ARB therapy, statin, diuretic, PEEP at admission, FiO2 at admission, PaO2/FiO2 at admission                                                                                                                                                                                                      | Cox proportional hazards regression                                                     | N = 3988<br>Deaths: 1926 (48.29%)<br><56 yrs.: 245/997<br>56-63 yrs.: 416/997<br>64-69 yrs.: 562/997<br>>69 yrs.: 703/997                                                                                                                         | In-hospital mortality HR (95% CI)<br><56 yrs.: Reference<br>56-63 yrs.: 1.91 (1.63-2.24)<br>64-69 yrs.: 2.98 (2.56-3.46)<br>>69 yrs.: 4.25 (3.68-4.92) | In-hospital mortality HR (95% CI)<br>Age (per 10 years): 1.75 (1.60-1.92)<br>Age (per year, own calculations): 1.06 (1.05-1.07)                                                                                                                                                                                                                                                                                                                                                                                                                    |
| Gupta 2020 (216)      | Sex, race, hypertension, diabetes, BMI, coronary artery disease, congestive heart failure, chronic obstructive pulmonary disease, current smoker, active cancer, ≤3 d from symptom onset to ICU day 1, lymphocyte count <1000/μL on ICU day 1, invasive mechanical ventilation support/O2 level, shock on ICU day 1, coagulation component of SOFA score, liver component of SOFA score, renal component of SOFA score, no. of ICU beds | Multilevel logistic regression modelling to account for hospitals<br><br>Cox regression | N= 2215<br>Deaths: 784 (35.4%)<br>Mechanical ventilation: 1494 (67.44%)<br><br>28-day in-hospital mortality<br>18-39 yrs.: 31/209<br>40-49 yrs.: 64/282<br>50-59 yrs.: 124/487<br>60-69 yrs.: 239/614<br>70-79 yrs.: 201/424<br>≥80 yrs.: 125/199 | NA                                                                                                                                                     | 28-day in-hospital mortality for ICU patients<br>OR (95% CI)<br>Multilevel logistic regression<br>18-39 yrs.: Reference<br>40-49 yrs.: 1.65 (0.97-2.80)<br>50-59 yrs.: 1.71 (1.05-2.80)<br>60-69 yrs.: 3.18 (1.95-5.18)<br>70-79 yrs.: 5.36 (3.20-9.00)<br>≥80 yrs.: 11.15 (6.19-20.06)<br><br>Cox regression model (time-to-event analyses)<br>HR (95% CI)<br>18-39 yrs.: Reference<br>40-49 yrs.: 1.29 (0.85-1.96)<br>50-59 yrs.: 1.39 (0.94-2.04)<br>60-69 yrs.: 2.09 (1.43-3.04)<br>70-79 yrs.: 2.70 (1.83-3.98)<br>≥80 yrs.: 4.55 (3.00-6.92) |

| Author, Year (Ref) | Confounders and age-dependent risk factors used in the model                                                                                                                                | Type of analysis # cases / # non-cases                                                           | N in analysis Total deaths In age group: # cases/total                                        | Results Unadjusted effect estimates (if available)                                                                                                                                                                                              | Results Adjusted effect estimates                                                                                                                                                                                                                                                          |
|--------------------|---------------------------------------------------------------------------------------------------------------------------------------------------------------------------------------------|--------------------------------------------------------------------------------------------------|-----------------------------------------------------------------------------------------------|-------------------------------------------------------------------------------------------------------------------------------------------------------------------------------------------------------------------------------------------------|--------------------------------------------------------------------------------------------------------------------------------------------------------------------------------------------------------------------------------------------------------------------------------------------|
|                    |                                                                                                                                                                                             |                                                                                                  |                                                                                               |                                                                                                                                                                                                                                                 | 28-day mortality in mechanically ventilated patients OR (95% CI)<br>Multilevel logistic regression<br>18-39 yrs.: Reference<br>40-49 yrs.: 1.28 (0.70-2.33)<br>50-59 yrs.: 1.47 (0.84-2.58)<br>60-69 yrs.: 2.39 (1.37-4.18)<br>70-79 yrs.: 3.39 (1.86-6.20)<br>≥80 yrs.: 9.20 (4.55-18.60) |
| Hashemi 2020 (220) | Chronic liver disease, obesity, sex, cardiac diseases, hypertension, diabetes, hyperlipidaemia, pulmonary disorders                                                                         | Logistic regression                                                                              | N=363<br>Deaths: NA                                                                           | NA                                                                                                                                                                                                                                              | In-hospital mortality OR (95% CI)<br>Age (per year): 1.08 (1.05-1.12)                                                                                                                                                                                                                      |
| Hewitt* 2020 (221) | Sex, smoking status, increased C-reactive protein, diabetes, coronary artery disease, hypertension, impaired renal function, clinical frailty scale                                         | Cox proportional baseline hazards model (Mortality)<br><br>Logistic regression (Day-7 Mortality) | N=1564<br>Deaths: 425 (27.2%)<br><65 yrs.: 55/488<br>65-79 yrs.: 168/535<br>≥80 yrs.: 202/541 | In-hospital mortality HR (95% CI)<br><65 yrs.: Reference<br>65-79 yrs.: 3.30 (2.40-4.55)<br>≥80 yrs.: 4.05 (2.95-5.57)<br><br>Day-7 mortality OR (95% CI)<br><65 yrs.: Reference<br>65-79 yrs.: 4.62 (2.89-7.39)<br>≥80 yrs.: 6.68 (4.18-10.67) | In-hospital mortality HR (95% CI)<br><65 yrs.: Reference<br>65-79 yrs.: 2.58 (1.82-3.64)<br>≥80 yrs.: 2.92 (2.02-4.22)<br><br>Day-7 mortality OR (95% CI)<br><65 yrs.: Reference<br>65-79 yrs.: 2.79 (1.66-4.72)<br>≥80 yrs.: 3.51 (2.01-6.15)                                             |
| Hwang 2020 (224)   | Diabetes mellitus, chronic lung disease, cardiovascular disease, Alzheimer's dementia, stroke                                                                                               | Cox proportional hazards regression                                                              | N=103<br>Deaths: 26 (25%)                                                                     | NA                                                                                                                                                                                                                                              | In-hospital mortality HR (95% CI)<br>Age (per year): 1.055 (1.003-1.109)                                                                                                                                                                                                                   |
| Imam 2020 (225)    | Charlson Comorbidity Index, non-steroidal anti-inflammatory medication, angiotensin converting enzyme-inhibitor/angiotensin receptor blocker                                                | Logistic regression                                                                              | N=1305<br>Deaths: 200 (15.3%)<br>Age<60: NA<br>Age>60: NA                                     | In-hospital mortality OR (95%CI)<br>Age<60: Reference<br>Age>60: 3.66 (2.57-5.20)                                                                                                                                                               | In-hospital mortality OR (95%CI)<br>Age<60: Reference<br>Age>60: 1.93 (1.26-2.94)                                                                                                                                                                                                          |
| Jun 2020 (226)     | Sex, race, Manhattan facility, hypertension, diabetes, coronary artery disease, heart failure, atrial fibrillation, chronic kidney disease, COPD/asthma, obesity, cancer, oxygen saturation | Logistic regression                                                                              | N=3086<br>Deaths: 885 (28.7%)                                                                 | In-hospital mortality OR (95% CI)<br>Age (per year): 1.06 (1.05-1.06)                                                                                                                                                                           | In-hospital mortality OR (95% CI)<br>Age (per year): 1.06 (1.05-1.07)                                                                                                                                                                                                                      |

| Author, Year<br>(Ref)    | Confounders and age-dependent risk factors used in the model                                                                                                                                                                                                                                                                                                           | Type of analysis<br># cases / # non-cases                                                              | N in analysis<br>Total deaths<br>In age group: # cases/total                                                                                                       | Results<br>Unadjusted effect estimates (if available)                                                                                                                                                                         | Results<br>Adjusted effect estimates                                                                                                                                                                                          |
|--------------------------|------------------------------------------------------------------------------------------------------------------------------------------------------------------------------------------------------------------------------------------------------------------------------------------------------------------------------------------------------------------------|--------------------------------------------------------------------------------------------------------|--------------------------------------------------------------------------------------------------------------------------------------------------------------------|-------------------------------------------------------------------------------------------------------------------------------------------------------------------------------------------------------------------------------|-------------------------------------------------------------------------------------------------------------------------------------------------------------------------------------------------------------------------------|
| Khaili<br>2020<br>(229)  | 11 in total, not all specified<br>Sex, comorbidities (2-3/4+, including asthma, COPD, cardiovascular disease, hypertension, hyperlipidemia, diabetes, kidney disease, cerebrovascular accident, dementia, malignancy, liver disease, other comorbidities), respiratory rate, systolic blood pressure, lymphocyte count, platelet count, CRP, urea, creatinine, albumin | Cox proportional hazards regression                                                                    | N= 220<br>Deaths: 58 (26,4%)                                                                                                                                       | NA                                                                                                                                                                                                                            | 28-days in-hospital mortality HR (95% CI)<br>Age (per year): 1.04 (1.01-1.07)                                                                                                                                                 |
| Kim<br>2020<br>(231)     | Sex, race, ethnicity, smoker, hypertension, obesity, diabetes, chronic lung disease, cardiovascular disease, neurologic, renal, immunosuppression, gastrointestinal or liver, hematologic, rheumatologic or autoimmune, outpatient ACE-inhibitor use, angiotensin receptor blocker use prior to hospitalization                                                        | Log-linked Poisson generalized estimating equation regressions with an exchangeable correlation matrix | N= 2490<br>Deaths: 420 (16.9%)<br>18-39 yrs.: 6/302<br>40-49 yrs.: 10/318<br>50-64 yrs.: 74/744<br>65-74 yrs.: 103/478<br>75-84 yrs.: 120/397<br>≥85 yrs.: 107/251 | In-hospital mortality RR (95% CI)<br>18-39 yrs.: Reference<br>40-49 yrs.: 1.51 (0.59-3.85)<br>50-64 yrs.: 4.62 (2.1-10.18)<br>65-74 yrs.: 9.88 (4.28-22.85)<br>75-84 yrs.: 13.89 (6.12-31.52)<br>≥85 yrs.: 19.46 (9.39-40.35) | In-hospital-mortality RR (95% CI)<br>18-39 yrs.: Reference<br>40-49 yrs.: 1.23 (0.51-2.99)<br>50-64 yrs.: 3.11 (1.50-6.46)<br>65-74 yrs.: 5.77 (2.64-12.64)<br>75-84 yrs.: 7.67 (3.35-17.59)<br>≥85 yrs.: 10.98 (5.09 -23.69) |
| Klang<br>2020<br>(233)   | Sex, cancer, coronary artery disease, congestive heart failure, hypertension, diabetes, hyperlipidemia, chronic kidney disease, smoking, BMI, race                                                                                                                                                                                                                     | Multivariable logistic regression                                                                      | N= 3406<br>Deaths: 1136 (33.3%)<br>Age ≤50 yrs.: 60/572<br>Age >50 yrs.: 1076/2834                                                                                 | NA                                                                                                                                                                                                                            | In-hospital mortality OR (95% CIs)<br>Age ≤50yrs.<br>Per decile: 3.0 (1.9-4.8)<br>Age >50 yrs.<br>Per decile: 1.7 (1.6-1.8)                                                                                                   |
| Li<br>2020<br>(238)      | Sex, diabetes, malignancy, hypertension, coronary heart disease, arrhythmia, cerebrovascular disease                                                                                                                                                                                                                                                                   | Cox regression analysis                                                                                | N= 596<br>Deaths: 54 (9.1%)<br><65 yrs.: NA<br>≥65 yrs.: NA                                                                                                        | In-hospital mortality HR (95% CI)<br>Age <65 years: Reference<br>Age ≥65 years: 4.284 (2.385–7.694)                                                                                                                           | In-hospital mortality HR (95% CI)<br>Age <65 years: Reference<br>Age ≥65 years: 3.007 (1.634–5.533)                                                                                                                           |
| Magleby<br>2020<br>(241) | Sex, race, coronary artery disease, congestive heart failure, cerebrovascular disease, hypertension, COPD, days of symptoms prior to admission, fever, cough, headache, myalgias, nausea/vomiting, altered mental status, ageusia, highest level of                                                                                                                    | Logistic regression                                                                                    | N= 678<br>Deaths: 127 (18.7%)                                                                                                                                      | NA                                                                                                                                                                                                                            | In-hospital mortality OR (95% CI)<br>Per year: 1.10 (1.07-1.13)                                                                                                                                                               |



| Author, Year (Ref)                             | Confounders and age-dependent risk factors used in the model                                                                                                                                                                                                                                                                                                                                                | Type of analysis # cases / # non-cases         | N in analysis Total deaths In age group: # cases/total                                                                                                                                | Results Unadjusted effect estimates (if available)                                                                                                             | Results Adjusted effect estimates                                                                                                                              |
|------------------------------------------------|-------------------------------------------------------------------------------------------------------------------------------------------------------------------------------------------------------------------------------------------------------------------------------------------------------------------------------------------------------------------------------------------------------------|------------------------------------------------|---------------------------------------------------------------------------------------------------------------------------------------------------------------------------------------|----------------------------------------------------------------------------------------------------------------------------------------------------------------|----------------------------------------------------------------------------------------------------------------------------------------------------------------|
|                                                | supplemental oxygen, X-ray findings, viral load                                                                                                                                                                                                                                                                                                                                                             |                                                |                                                                                                                                                                                       |                                                                                                                                                                |                                                                                                                                                                |
| Meng 2020 (248)                                | Sex, hypertension, coronary heart disease, diabetes, COPD, chronic kidney disease, cerebrovascular disease, hepatitis, tuberculosis, tumor                                                                                                                                                                                                                                                                  | Logistic regression                            | N= 2556 (non-cancer patients)<br>N= 2665 (cancer and non-cancer patients)<br>Deaths: 293 (11.0%)<br>≤49 yrs.: 14/707<br>50-64 yrs.: 80/907<br>65-79 yrs.: 142/866<br>≥80 yrs.: 57/185 | In-hospital mortality OR (95% CI)<br>≤49 years: Reference<br>50-64 years: 4.79 (2.69-8.52)<br>65-79 years: 9.70 (5.55-16.96)<br>≥80 years: 22.03 (11.92-40.71) | In-hospital mortality OR (95% CI)<br>≤49 years: Reference<br>50-64 years: 5.06 (2.82-9.06)<br>65-79 years: 9.97 (5.64-17.63)<br>≥80 years: 20.33 (10.76-38.44) |
| Murillo-Zamora and Hernandez-Suarez 2020 (255) | Sex, tobacco use, obesity, asthma, COPD, diabetes, hypertension, immunosuppression, chronic kidney disease, clinically diagnosed pneumonia at hospital                                                                                                                                                                                                                                                      | Cox proportional hazards model                 | N= 66,123<br>Deaths: 32,039 (48,5%)<br>20-29 yrs.: 367/2,264<br>30-44 yrs.: 2,788/10,616<br>45-59 yrs.: 9,367/22,415<br>60+ yrs.: 19,517/30,828                                       | NA (Bivariate analyses)                                                                                                                                        | In-hospital mortality HR (95% CI)<br>20-29 yrs.: Reference<br>30-44 yrs.: 1.60 (1.44-1.79)<br>45-59 yrs.: 2.37 (2.13-2.63)<br>60+ yrs.: 3.55 (3.20-3.94)       |
| Narain 2020 (257)                              | CCS treatment group, sex, race, ethnicity, insurance, smoking status, mechanical ventilation, vasopressors, eosinophils, platelets, hemoglobin, eGFR, AST, ALT, sodium, ferritin, CRP, D-dimer, LDH, NLR, hospital, Charlson index, asthma, COPD, chronic liver disorder, diabetes, autoimmune disorder, cardiovascular disease, hypertension, interstitial lung disease, kidney disease, hemodialysis, BMI | Cox regression model                           | N= 5,776<br>Deaths: NA                                                                                                                                                                | NA                                                                                                                                                             | In-hospital mortality among CCS patients<br><br>Per year increase: HR= 1.03 (95% CI: 1.02-1.04)                                                                |
| Palaiodimos 2020 (259)                         | Sex, BMI, heart failure, coronary artery disease, diabetes, chronic kidney disease or end stage renal disease, COPD, smoking status                                                                                                                                                                                                                                                                         | Logistic regression, forward stepwise approach | N= 200<br>Deaths: 48 (24.0%)                                                                                                                                                          | In-hospital mortality OR (95%CI)<br><br>Per year increase: 1.03 (1.01–1.06)                                                                                    | In-hospital mortality OR (95%CI)<br><br>Per year increase: 1.03 (1.00-1.07)                                                                                    |

| Author, Year<br>(Ref)         | Confounders and age-dependent risk factors used in the model                                                                                                                   | Type of analysis<br># cases / # non-cases        | N in analysis<br>Total deaths<br>In age group: # cases/total                                                                                                        | Results<br>Unadjusted effect estimates (if available) | Results<br>Adjusted effect estimates                                                                                                                                                                                                                                                                                                                                                                                                                              |
|-------------------------------|--------------------------------------------------------------------------------------------------------------------------------------------------------------------------------|--------------------------------------------------|---------------------------------------------------------------------------------------------------------------------------------------------------------------------|-------------------------------------------------------|-------------------------------------------------------------------------------------------------------------------------------------------------------------------------------------------------------------------------------------------------------------------------------------------------------------------------------------------------------------------------------------------------------------------------------------------------------------------|
| Patel<br>2020<br>(261)        | Therapeutic anticoagulation, home antiplatelet, race, BMI, Charlson score, glucose level                                                                                       | Poisson regression model and logistic regression | N=1716<br>Deaths= 125 (7.3%)<br>Deaths in critical: 125 (7.3%)<br>18-44 yrs.: NA<br>45- 59 yrs.: NA<br>60-69 yrs.: NA<br>70-79 yrs.: NA<br>>80 yrs.: NA             | NA                                                    | In-hospital mortality<br>18-44 yrs.: IRR= 1.36 (95% CI: 0.57-3.28)<br>45-59 yrs.: Reference<br>60-69 yrs.: IRR= 1.30 (95% CI: 0.69-2.46)<br>70-79 yrs.: IRR= 1.31 (95% CI: 0.65-2.65)<br>>80 yrs.: IRR= 2.36 (95% CI: 1.12-2.47)<br><br>Death in critical<br>18-44 yrs.: OR= 1.43 (95% CI: 0.49-4.17)<br>45- 59 yrs.: Reference<br>60-69 yrs.: OR= 1.82 (95% CI: 0.83-3.97)<br>70-79 yrs.: OR= 1.36 (95% CI: 0.55-3.37)<br>>80 yrs.: OR= 2.74 (95% CI: 1.03-7.32) |
| Perez-Guzman<br>2020<br>(262) | Race, sex, Eixhauser index                                                                                                                                                     | Logistic regression                              | N= 559<br>Deaths: 178 (32%)                                                                                                                                         | NA                                                    | In-hospital mortality:<br><br>Per year: OR= 1.05 (1.03-1.06)                                                                                                                                                                                                                                                                                                                                                                                                      |
| Petrilli<br>2020<br>(263)     | Week, race/ethnicity, smoking status, BMI, coronary artery disease, heart failure, hyperlipidemia, hypertension, diabetes, asthma or COPD, chronic kidney disease, cancer, sex | Competing risk model                             | N= 5279 (positive test)<br>N= 2741 (hospitalized)<br>Deaths:<br>665 (24.3%)<br>19-44 yrs.: NA<br>45-54 yrs.: NA<br>55-64 yrs.: NA<br>65-74 yrs.: NA<br>≥75 yrs.: NA | NA                                                    | In-hospital death or discharge to hospice: HR (95% CIs)<br>Adjusted<br>19-44 yrs.: Reference<br>45-54 yrs.: 2.59 (1.66-4.32)<br>55-64 yrs.: 4.40 (2.73-7.11)<br>65-74 yrs.: 6.99 (4.34-11.27)<br>≥75 yrs.: 10.34 (6.37-16.79)                                                                                                                                                                                                                                     |

| Author, Year<br>(Ref)    | Confounders and age-dependent risk factors used in the model                                                                                                                                                                                                                                                                                                                                                   | Type of analysis<br># cases / # non-cases                                                                     | N in analysis<br>Total deaths<br>In age group: # cases/total                                                                                                                                                                                                                            | Results<br>Unadjusted effect estimates (if available)                                                                                                                                                                                                                                    | Results<br>Adjusted effect estimates                                                                                                                                                                                                                                                  |
|--------------------------|----------------------------------------------------------------------------------------------------------------------------------------------------------------------------------------------------------------------------------------------------------------------------------------------------------------------------------------------------------------------------------------------------------------|---------------------------------------------------------------------------------------------------------------|-----------------------------------------------------------------------------------------------------------------------------------------------------------------------------------------------------------------------------------------------------------------------------------------|------------------------------------------------------------------------------------------------------------------------------------------------------------------------------------------------------------------------------------------------------------------------------------------|---------------------------------------------------------------------------------------------------------------------------------------------------------------------------------------------------------------------------------------------------------------------------------------|
| Price-Haywood 2020 (266) | Race, sex, Charlson Comorbidity Index score, low-income residency, obesity                                                                                                                                                                                                                                                                                                                                     | Cox proportional-hazards models<br>For variables for which less than 25% of data missing, values were imputed | N = 1382<br>Deaths: 326 (23.6%)                                                                                                                                                                                                                                                         | In-hospital mortality: HR (95% CI)<br>Adjusted for race and sex:<br>Per 5-yr. unit increase:<br>1.18 (1.13-1.23)<br>Per 1-yr unit increase (own calculations): 1.03 (1.02-1.04)                                                                                                          | In-hospital mortality: HR (95% CI)<br>Fully adjusted:<br>Per 5-yr. unit increase: 1.19 (1.13-1.24)<br>Per 1-yr unit increase (own calculations): 1.04 (1.02-1.04)                                                                                                                     |
| Reilev 2020 (269)        | Number of comorbidities (0,1,2,3,4+ of chronic lung disease, hypertension, ischaemic heart disease, heart failure, atrial fibrillation, stroke, diabetes, dementia, cancer, chronic liver disease, hospital-diagnosed kidney disease, alcohol abuse, substance abuse, major psychiatric disorders, organ transplantation, medical overweight and obesity, rheumatoid arthritis/connective-tissue disease), sex | Logistic regression                                                                                           | N= 2254 hospitalized (for ICU, in-hospital mortality)<br>Deaths: NA<br>0-9 yrs.: NA/11<br>10-19 yrs.: NA/14<br>20-29 yrs.: NA/55<br>30-39 yrs.: NA/90<br>40-49 yrs.: NA/192<br>50-59 yrs.: NA/337<br>60-69 yrs.: NA/374<br>70-79 yrs.: NA/578<br>80-89 yrs.: NA/476<br>90+ yrs.: NA/127 | In-hospital mortality OR (95% CI)<br>Unadjusted<br>0-9 yrs.: NA<br>10-19 yrs.: NA<br>20-29 yrs.: NA<br>30-39 yrs.: NA<br>40-49 yrs.: NA<br>50-59 yrs.: Reference<br>60-69 yrs.: 3.5 (1.9-6.4)<br>70-79 yrs.: 7.2 (4.1-12.8)<br>80-89 yrs.: 13.3 (7.5-23.4)<br>90+ yrs.: 32.2 (17.0-61.1) | In-hospital mortality OR (95% CI)<br>Adjusted<br>0-9 yrs.: NA<br>10-19 yrs.: NA<br>20-29 yrs.: NA<br>30-39 yrs.: NA<br>40-49 yrs.: NA<br>50-59 yrs.: Reference<br>60-69 yrs.: 2.9 (1.6-5.4)<br>70-79 yrs.: 5.2 (2.9-9.2)<br>80-89 yrs.: 10.2 (5.7-18.2)<br>90+ yrs.: 29.1 (15.0-56.5) |
| Salacup 2020 (277)       | Sex, BMI, ethnicity, COPD and asthma, diabetes, hypertension, cirrhosis, heart failure, chronic kidney disease                                                                                                                                                                                                                                                                                                 | Logistic regression                                                                                           | N= 242<br>Deaths: 52 (21,5%)                                                                                                                                                                                                                                                            | NA                                                                                                                                                                                                                                                                                       | In hospital mortality OR (95% CI)<br>Per year: 1.056 (1.023-1.090)                                                                                                                                                                                                                    |
| Sapey 2020 (279)         | Ethnicity, sex, deprivation, comorbidity number group 0, 1-2, 3+ (hypertension, cerebrovascular disease, atrial fibrillation, ischaemic heart disease/angina/myocardial infarct, diabetes (type 1 and 2), asthma, COPD, interstitial lung disease, chronic kidney disease, any active malignancy, dementia, obesity)                                                                                           | Cox proportional hazard regression                                                                            | N=2169<br>Deaths: 769 (34.6%)                                                                                                                                                                                                                                                           | NA                                                                                                                                                                                                                                                                                       | In-hospital mortality HR (95% CI)<br>Age (z-score): 2.4 (1.8-3.2)<br>Age (z-score) x sex(male): 1.2 (1.0-1.5)<br>Age (z-score) x comorbidity group 1-2: 0.9 (0.7-1.2)<br>Age (z-score) x comorbidity group 3+: 0.7 (0.5-0.9)                                                          |
| Seiglie 2020 (280)       | BMI, sex, race/ethnicity, diabetes, coronary artery disease or myocardial infarction, chronic heart failure,                                                                                                                                                                                                                                                                                                   | Logistic regression                                                                                           | N=450<br>Deaths: 49 (10.9%)<br><50 yrs.: NA<br>50-59 yrs.: NA                                                                                                                                                                                                                           | 14-day in-hospital death OR (95% CIs)<br><50 yrs.: Reference<br>50-59 yrs.: 7.05 (0.81-61.7)                                                                                                                                                                                             | 14-day in-hospital death OR (95% CI)<br><50 yrs.: Reference<br>50-59 yrs.: 3.74 (0.40-34.54)<br>60-69 yrs.: 4.57 (0.50-41.9)                                                                                                                                                          |

| Author, Year (Ref)    | Confounders and age-dependent risk factors used in the model                                                                                                                                                                                                                                                       | Type of analysis # cases / # non-cases   | N in analysis Total deaths In age group: # cases/total                                                                                                                                                                                                    | Results Unadjusted effect estimates (if available)                                                                          | Results Adjusted effect estimates                                                                                                                             |
|-----------------------|--------------------------------------------------------------------------------------------------------------------------------------------------------------------------------------------------------------------------------------------------------------------------------------------------------------------|------------------------------------------|-----------------------------------------------------------------------------------------------------------------------------------------------------------------------------------------------------------------------------------------------------------|-----------------------------------------------------------------------------------------------------------------------------|---------------------------------------------------------------------------------------------------------------------------------------------------------------|
|                       | hypertension, COPD/asthma, active cancer, liver disease, renal disease                                                                                                                                                                                                                                             |                                          | 60-69 yrs.: NA<br>≥70 yrs.: NA                                                                                                                                                                                                                            | 60-69 yrs.: 8.35 (0.98-70.8)<br>≥70 yrs.: 27.03 (3.65-200.2)                                                                | ≥70 yrs.: 12.66 (1.50-106.56)                                                                                                                                 |
| Shah 2020 (281)       | BMI, sex, ethnicity, hypertension, coronary artery disease, congestive heart failure, COPD, asthma, chronic kidney disease, diabetes, immunosuppression, chronic liver disease, cancer, tobacco smoking                                                                                                            | Logistic regression                      | N= 522<br>Deaths: 92 (17.6%)<br><65 yrs: NA<br>≥65 yrs.: NA<br>-----<br><20 yrs.: 0<br>20-29 yrs.: 1/19<br>30-39 yrs.: 1/34<br>40-49 yrs.: 8/58<br>50-59 yrs.: 7/111<br>60-69 yrs.: 29/137<br>70-79 yrs.: 27/104<br>80-89 yrs.: 13/42<br>90-99 yrs.: 6/17 | NA                                                                                                                          | In-hospital mortality OR (95% CI)<br><65 yrs: Reference<br>≥ 65 yrs.: 3.1 (1.7-5.6)                                                                           |
| Shi 2020 (285)        | Cardiovascular disease, cerebrovascular disease, diabetes, COPD, renal failure, cancer, acute respiratory distress syndrome, cardiac injury, creatinine, N-terminal pro-B-type natriuretic peptide                                                                                                                 | Cox proportional hazard regression model | N= 416<br>Deaths: 57 (13.7%)                                                                                                                                                                                                                              | NA                                                                                                                          | In-hospital mortality<br>From symptom onset HR (95% CI)<br>Age (per year): 1.02 (0.99-1.05)<br>From admission HR (95% CI)<br>Age (per year): 1.02 (0.99-1.04) |
| van Gerwen 2020 (301) | Sex, race, smoking, BMI, hypertension, coronary artery disease, atrial fibrillation, congestive heart failure, peripheral vascular disease, cerebrovascular accident/transient ischemic attack, dementia, diabetes, hypothyroidism, chronic kidney disease, malignancy, asthma, COPD, prior venous thromboembolism | Logistic regression                      | N=3703 (all patients)<br>N=2015 (hospitalized)<br>Deaths: 616 (30.6% of hospitalized)<br>18-40 yrs.: 8/207<br>40-60 yrs.: 101/539<br>>60 yrs.: 507/1269                                                                                                   | In-hospital mortality OR (95% CI)<br>18-40 yrs.: Reference<br>40-60 yrs.: 5.74 (2.74-12.01)<br>>60 yrs.: 16.55 (8.09-33.85) | In-hospital mortality OR (95% CI)<br>18-40 yrs.: Reference<br>40-60 yrs.: 5.29 (2.51-11.15)<br>>60 yrs.: 13.04 (6.25-27.24)                                   |
| Wang 2020 (305)       | Model 1:<br>Cardiovascular disease, cerebrovascular disease, COPD                                                                                                                                                                                                                                                  | Cox regression                           | N=7592<br>Deaths: 65 (19.2%)                                                                                                                                                                                                                              | In-hospital mortality in patients over 60 years old HR (95% CI)<br>Age (per year): 1.084 (1.055-1.114)                      | In-hospital mortality in patients over 60 years old HR (95% CI)<br>Age (per year): 1.064 (1.034-1.096)                                                        |

| Author, Year<br>(Ref)                                                                                                                                                                                                                                                               | Confounders and age-dependent risk factors used in the model                                                                                                                                                                                                                                                               | Type of analysis<br># cases / # non-cases | N in analysis<br>Total deaths<br>In age group: # cases/total                                                     | Results<br>Unadjusted effect estimates (if available)                                                                                                                                        | Results<br>Adjusted effect estimates                                                                                                                                                                                                                                                                                                                      |
|-------------------------------------------------------------------------------------------------------------------------------------------------------------------------------------------------------------------------------------------------------------------------------------|----------------------------------------------------------------------------------------------------------------------------------------------------------------------------------------------------------------------------------------------------------------------------------------------------------------------------|-------------------------------------------|------------------------------------------------------------------------------------------------------------------|----------------------------------------------------------------------------------------------------------------------------------------------------------------------------------------------|-----------------------------------------------------------------------------------------------------------------------------------------------------------------------------------------------------------------------------------------------------------------------------------------------------------------------------------------------------------|
| Yehia 2020 (312)                                                                                                                                                                                                                                                                    | <p>Model 2:<br/>Race, sex, insurance, neighborhood deprivation index, Elixhauser Comorbidity Index (ECI score)</p> <p>Model 3:<br/>Race, sex, insurance, neighborhood deprivation index, ECI score, asthma, cancer, chronic kidney disease, COPD, congestive heart failure, coronary artery disease, diabetes, obesity</p> | Cox proportional hazards regression       | <p>N=7139<br/>Deaths: 1446 (20.3%)<br/>18-49 yrs.: NA<br/>50-64 yrs.: NA<br/>65-84 yrs.: NA<br/>≥85 yrs.: NA</p> | <p>In-hospital mortality HR (95% CI)<br/>Model 1 (unadjusted)<br/>18-49 yrs.: Reference<br/>50-64 yrs.: 1.54 (1.17-2.03)<br/>65-84 yrs.: 3.36 (2.61-4.34)<br/>≥85 yrs.: 5.65 (4.32-7.38)</p> | <p>In-hospital mortality HR (95% CI)<br/>Model 2 (adjusted)<br/>18-49 yrs.: Reference<br/>50-64 yrs.: 1.40 (1.13-1.73)<br/>65-84 yrs.: 2.44 (1.79-3.33)<br/>≥85 yrs.: 4.00 (2.95-5.47)</p> <p>Model 3 (adjusted)<br/>18-49 yrs.: Reference<br/>50-64 yrs.: 1.36 (1.11-1.67)<br/>65-84 yrs.: 2.38 (1.73-3.26)<br/>≥85 yrs.: 3.96 (2.82-5.55)</p>           |
| Zhao 2020 (319)                                                                                                                                                                                                                                                                     | Sex, comorbidities (hypertension, diabetes, coronary heart disease, COPD, asthma, cerebrovascular disease, chronic renal disease, chronic liver disease, malignancy, autoimmune disease, organ transplantation)                                                                                                            | Cox proportional hazard regression        | <p>N=1000<br/>Deaths: 119 (11.9%)<br/>&lt;60 yrs.: 24/473<br/>60-75 yrs.: 42/359<br/>≥75 yrs.: 53/168</p>        | NA                                                                                                                                                                                           | <p>In-hospital mortality HR (95% CI)<br/>Model 1 (cumulative death risk after admission):<br/>&lt;60 yrs.: Reference<br/>60-75 yrs.: 1.944 (1.156-3.271)<br/>≥75 yrs.: 4.777 (2.850-8.008)</p> <p>Model 2 (cumulative death risk after disease onset):<br/>&lt;60 yrs.: Reference<br/>60-75 yrs.: 1.849 (1.1-3.108)<br/>≥75 yrs.: 4.770 (2.841-8.008)</p> |
| <p>*: same study population<br/>ICU: intensive care unit; COPD: chronic obstructive pulmonary disease; BMI: body mass index; yrs.: years; SOFA score: sequential organ failure assessment score; OR: odds ratio; HR: hazards ratio; CI: confidence intervals; NA: not available</p> |                                                                                                                                                                                                                                                                                                                            |                                           |                                                                                                                  |                                                                                                                                                                                              |                                                                                                                                                                                                                                                                                                                                                           |

Table S4. Risk of bias summary for studies investigating in-hospital mortality

| Study                            | Major domains         |                     |                               |             |                 | Minor domains |         |                      | OVERALL |
|----------------------------------|-----------------------|---------------------|-------------------------------|-------------|-----------------|---------------|---------|----------------------|---------|
|                                  | Recruitment procedure | Exposure assessment | Outcome source and validation | Confounding | Analysis method | Chronology    | Funding | Conflict of interest |         |
| Antwi-Amoabeng et al. 2020 (165) | ✓                     | ✗                   | ✓                             | ✗           | ✓               | ⚠             | ⚠       | ⚠                    | ✗       |
| Argenziano et al. 2020 (166)     | ✓                     | ✓                   | ✓                             | ✓           | ✓               | ✓             | ✓       | ✗                    | ✓       |
| Baqui et al. 2020 (168)          | ✓                     | ✓                   | ✓                             | ✓           | ✓               | ✓             | ✓       | ✓                    | ✓       |
| Boulle et al. 2020 (176)         | ✓                     | ✓                   | ✓                             | ✗           | ✓               | ✓             | ✓       | ✗                    | ✗       |
| Burn et al. 2020 (177)           | ✓                     | ✓                   | ✓                             | ✓           | ✓               | ✓             | ✓       | ✗                    | ✓       |
| Carter et al. 2020 (181)         | ✓                     | ✗                   | ✓                             | ✗           | ✓               | ✗             | ✓       | ✓                    | ✗       |
| Chen et al. 2020 (184)           | ✓                     | ✗                   | ✓                             | ✗           | ✓               | ✓             | ⚠       | ✓                    | ✗       |
| Chilimuri et al. 2020 (187)      | ✓                     | ✓                   | ✓                             | ✗           | ✓               | ✗             | ✓       | ✓                    | ✗       |
| Ciardullo et al. 2020 (188)      | ✓                     | ✓                   | ✓                             | ✗           | ✓               | ✓             | ✓       | ✓                    | ✗       |
| Conversano et al. 2020 (190)     | ✓                     | ✓                   | ✓                             | ✗           | ✓               | ✓             | ✓       | ✓                    | ✗       |
| Cummings et al. 2020 (193)       | ✓                     | ✓                   | ✓                             | ✗           | ✓               | ✗             | ✓       | ✓                    | ✗       |
| Di Castelnuovo et al. 2020 (197) | ✓                     | ✓                   | ✓                             | ✗           | ✓               | ✗             | ✓       | ✓                    | ✗       |
| Docherty et al. 2020 (198)       | ✗                     | ✓                   | ✓                             | ✓           | ✓               | ✓             | ✓       | ✓                    | ✗       |
| Giacomelli et al. 2020 (209)     | ✓                     | ✓                   | ✓                             | ✓           | ✓               | ✗             | ⚠       | ✓                    | ✓       |
| Grasselli et al. 2020 (213)      | ✓                     | ✓                   | ✓                             | ✗           | ✓               | ✗             | ✓       | ✗                    | ✗       |
| Gupta et al. 2020 (216)          | ✓                     | ✓                   | ✓                             | ✗           | ✓               | ✗             | ⚠       | ✗                    | ✗       |

| Study                            | Major domains         |                     |                               |             |                 | Minor domains |         |                      | OVERALL |
|----------------------------------|-----------------------|---------------------|-------------------------------|-------------|-----------------|---------------|---------|----------------------|---------|
|                                  | Recruitment procedure | Exposure assessment | Outcome source and validation | Confounding | Analysis method | Chronology    | Funding | Conflict of interest |         |
| Hashemi et al. 2020 (220)        | ✓                     | ✓                   | ✓                             | ✗           | ✓               | ✓             | ✓       | ✓                    | ✗       |
| Hewitt et al. 2020 (221)         | ✓                     | ✗                   | ✓                             | ✗           | ✓               | ✗             | ✓       | ✓                    | ✗       |
| Hwang et al. 2020 (224)          | ✗                     | ✓                   | ✓                             | ✗           | ✓               | ✓             | ✓       | ✓                    | ✗       |
| Imam et al. 2020 (225)           | ✓                     | ✗                   | ✓                             | ✗           | ✓               | ✓             | ✓       | ✓                    | ✗       |
| Jun et al. 2020 (226)            | ✓                     | ✓                   | ✓                             | ✗           | ✓               | ✗             | ✓       | ✓                    | ✗       |
| Khalil et al. 2020 (229)         | ✓                     | ✓                   | ✓                             | ✗           | ✓               | ✗             | ✓       | ✓                    | ✗       |
| Kim et al. 2020 (231)            | ✓                     | ✓                   | ✓                             | ✓           | ✓               | ✓             | ✓       | ✗                    | ✓       |
| Klang et al. 2020 (233)          | ✓                     | ✓                   | ✓                             | ✗           | ✓               | ✓             | ⚠       | ✓                    | ✗       |
| Li et al. 2020 (238)             | ✓                     | ✗                   | ✓                             | ✗           | ✓               | ✓             | ✓       | ✓                    | ✗       |
| Magleby et al. 2020 (241)        | ✓                     | ✓                   | ✓                             | ✗           | ✓               | ✗             | ✓       | ✗                    | ✗       |
| Meng et al. 2020 (248)           | ✓                     | ✓                   | ✓                             | ✗           | ✓               | ✓             | ✓       | ✓                    | ✗       |
| Murillo-Zamora et al. 2020 (255) | ✓                     | ✗                   | ✓                             | ✗           | ✓               | ✗             | ✓       | ✓                    | ✗       |
| Narain et al. 2020 (257)         | ✓                     | ✓                   | ✓                             | ✓           | ✓               | ✗             | ✓       | ✓                    | ✓       |
| Palaiodimos et al. 2020 (259)    | ✓                     | ✓                   | ✓                             | ✗           | ✓               | ✓             | ✓       | ✓                    | ✗       |
| Patel et al. 2020 (261)          | ⚠                     | ✓                   | ✓                             | ✓           | ✓               | ✗             | ✓       | ✓                    | ✗       |
| Perez-Guzman et al. 2020 (262)   | ✓                     | ✓                   | ✓                             | ✓           | ✓               | ✓             | ✓       | ✗                    | ✓       |
| Petrilli et al. 2020 (263)       | ✓                     | ✓                   | ✓                             | ✗           | ✓               | ✓             | ✓       | ✓                    | ✗       |
| Price-Haywood et al. 2020 (266)  | ✓                     | ✓                   | ✓                             | ✓           | ✓               | ✓             | ✓       | ✗                    | ✓       |

| Study                        | Major domains         |                     |                               |             |                 | Minor domains |         |                      | OVERALL |
|------------------------------|-----------------------|---------------------|-------------------------------|-------------|-----------------|---------------|---------|----------------------|---------|
|                              | Recruitment procedure | Exposure assessment | Outcome source and validation | Confounding | Analysis method | Chronology    | Funding | Conflict of interest |         |
| Reilev et al. 2020 (269)     | ✓                     | ✓                   | ✓                             | ✗           | ✓               | ✓             | ⚠       | ✗                    | ✗       |
| Salacup et al. 2020 (277)    | ✓                     | ✓                   | ✓                             | ✗           | ✓               | ✓             | ⚠       | ✓                    | ✗       |
| Sapey et al. 2020 (279)      | ✓                     | ✗                   | ✓                             | ✗           | ✓               | ✓             | ✓       | ✗                    | ✗       |
| Seiglie et al. 2020 (280)    | ✓                     | ✗                   | ✓                             | ✓           | ✓               | ✓             | ✓       | ✗                    | ✗       |
| Shah et al. 2020 (281)       | ✓                     | ✗                   | ✓                             | ✓           | ✓               | ✓             | ⚠       | ✓                    | ✗       |
| Shi et al. 2020 (285)        | ✓                     | ✓                   | ✓                             | ✗           | ✓               | ✗             | ✓       | ✓                    | ✗       |
| van Gerwen et al. 2020 (301) | ✓                     | ✗                   | ✓                             | ✗           | ✓               | ✓             | ✓       | ✓                    | ✗       |
| Wang et al. 2020 (305)       | ✓                     | ✓                   | ✓                             | ✗           | ✓               | ✓             | ✓       | ✓                    | ✗       |
| Yehia et al. 2020 (312)      | ✓                     | ✗                   | ✓                             | ✓           | ✓               | ✓             | ⚠       | ✗                    | ✗       |
| Zhao et al. 2020 (319)       | ✓                     | ✗                   | ✓                             | ✓           | ✓               | ✓             | ✓       | ✓                    | ✗       |

 = low risk of bias  
 = unclear risk of bias  
 = high risk of bias



**Figure S3. Relationship between median age and log of relative risk among studies using age as a categorical value (linear and cubic models, variance weighted): in-hospital mortality**

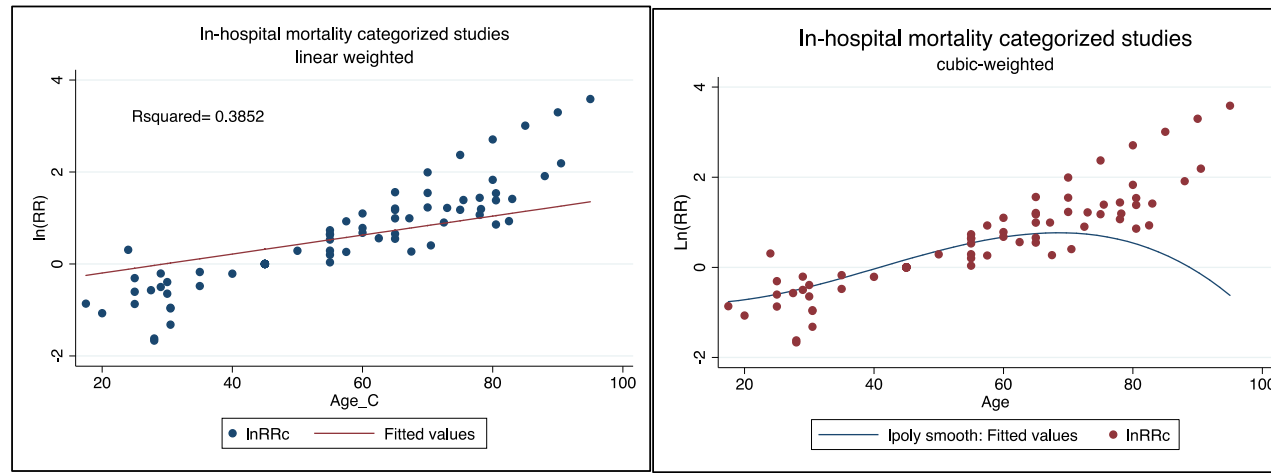

**Figure S4. Funnel plot of studies investigating in-hospital mortality**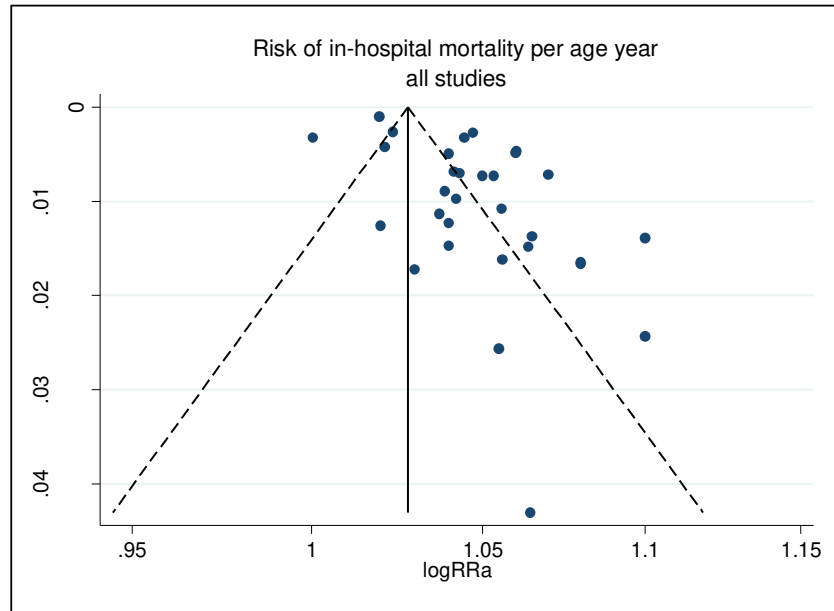

**Figures S5a-b. Funnel plot of studies investigating in-hospital mortality with age as continuous variable (a) and as categorical value (b)****(a)**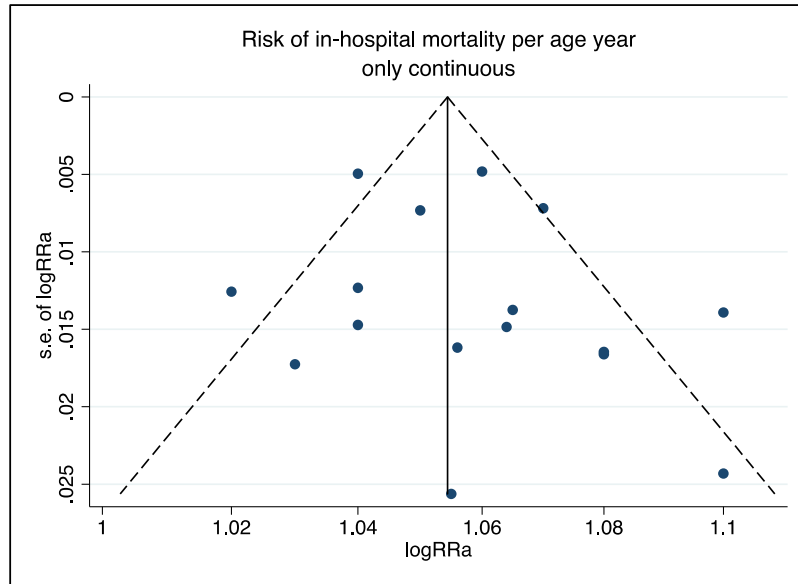**(b)**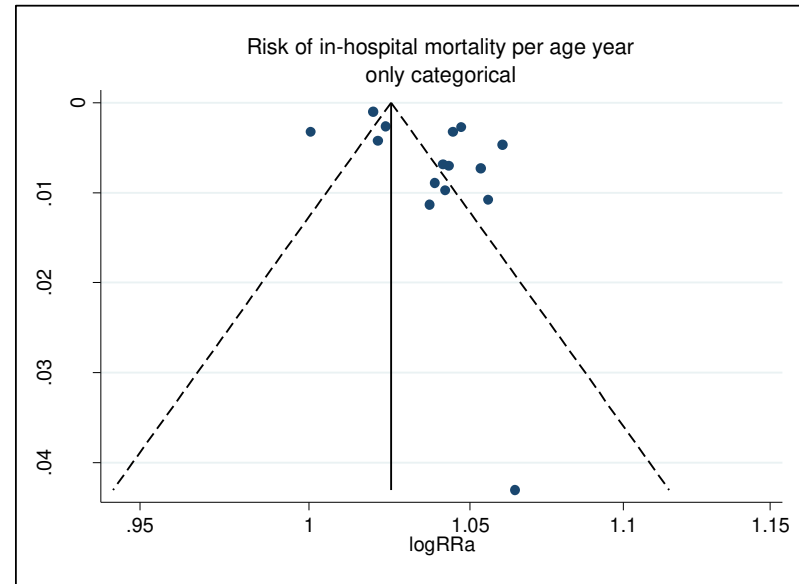

Table S5. Results of studies investigating case mortality

| Author, Year (Ref)         | Confounders and age-dependent risk factors used in the model                                                                                                            | Type of analysis # cases / # non-cases                                  | N in analysis Total deaths In age group: # cases/total                                                                                                                                                             | Results Unadjusted effect estimates (if available)                                                                                                                                                                                                                                                                                                                                                                                                               | Results Adjusted effect estimates                                                                                                                                                                                                                                                                                                                                                                                                                                                                                                                                                                                                          |
|----------------------------|-------------------------------------------------------------------------------------------------------------------------------------------------------------------------|-------------------------------------------------------------------------|--------------------------------------------------------------------------------------------------------------------------------------------------------------------------------------------------------------------|------------------------------------------------------------------------------------------------------------------------------------------------------------------------------------------------------------------------------------------------------------------------------------------------------------------------------------------------------------------------------------------------------------------------------------------------------------------|--------------------------------------------------------------------------------------------------------------------------------------------------------------------------------------------------------------------------------------------------------------------------------------------------------------------------------------------------------------------------------------------------------------------------------------------------------------------------------------------------------------------------------------------------------------------------------------------------------------------------------------------|
| Bello-Chavolla† 2020 (170) | Diabetes, diabetes (interaction with age<40 yrs.), smoking, immunosuppression, COPD, asthma, CVD, chronic kidney disease, hypertension, sex, obesity                    | Cox proportional risk regression                                        | N= 51,633<br>Deaths: 5332 (10.3%)<br><40 yrs.: NA<br>≥40yrs. - ≤65 yrs.: NA<br>>65 yrs.: NA                                                                                                                        |                                                                                                                                                                                                                                                                                                                                                                                                                                                                  | 30-day mortality (population based)<br><br>Results available in figures.                                                                                                                                                                                                                                                                                                                                                                                                                                                                                                                                                                   |
| Boulle 2020 (176)          | Sex, diabetes, hypertension, chronic kidney disease, chronic pulmonary disease/asthma, tuberculosis, HIV, antiretroviral therapy, CD4 count during COVID-19             | Cox proportional hazards model                                          | All public-sector SARS-CoV-2 cases diagnosed before June 1, 2020<br>N= 15,203<br>Deaths: 510<br>20-39 yrs.: 35/8688<br>40-49 yrs.: 51/3042<br>50-59 yrs.: 137/2018<br>60-69 yrs.: 150/889<br>≥70 yrs.: 137/566     | NA                                                                                                                                                                                                                                                                                                                                                                                                                                                               | Mortality HR (95% CI)<br><br>All public-sector SARS-CoV-2 cases diagnosed before June 1, 2020<br>20-39 yrs.: Reference<br>40-49 yrs.: 3.19 (2.06-4.93)<br>50-59 yrs.: 10.84 (7.34-16.01)<br>60-69 yrs.: 24.87 (16.67-37.11)<br>≥70 yrs.: 38.32 (25.47-57.64)                                                                                                                                                                                                                                                                                                                                                                               |
| Burn 2020 (177)            | Autoimmune condition, chronic kidney disease, COPD, dementia, heart disease, hyperlipidemia, hypertension, malignant neoplasm, obesity, Type 2 diabetes, Charlson Index | Cox proportional hazards model using a non-linear relationship with age | From diagnosed with COVID-19 to death<br>N= 102,002<br>Deaths: 2581<br>>18 yrs.: <5/4536<br>18-39 yrs.: 5/30,530<br>40-59 yrs.: 63/44,493<br>60-69 yrs.: 131/10,305<br>70-79 yrs.: 406/6120<br>≥80 yrs.: 1976/6018 | Population based mortality HR (95% CIs)<br><br>From diagnosed with COVID-19 to death (Age only model):<br>20-24 yrs.: 0.0074 (0.0023 to 0.024)<br>25-29 yrs.: 0.0089 (0.0038 to 0.021)<br>30-34 yrs.: 0.01 (0.0044 to 0.022)<br>35-39 yrs.: 0.0097 (0.0044 to 0.021)<br>40-44 yrs.: 0.0081 (0.0046 to 0.014)<br>45-49 yrs.: 0.009 (0.006 to 0.014)<br>50-54 yrs.: 0.023 (0.016 to 0.033)<br>55-59 yrs.: 0.095 (0.077 to 0.12)<br>60-64 yrs.: 0.35 (0.33 to 0.38) | Population based mortality HR (95% CIs)<br><br>From diagnosed with COVID-19 to death (Age and comorbidity model):<br>20-24 yrs.: 0.0083 (0.0024 to 0.03)<br>25-29 yrs.: 0.0099 (0.004 to 0.025)<br>30-34 yrs.: 0.011 (0.0047 to 0.027)<br>35-39 yrs.: 0.012 (0.005 to 0.027)<br>40-44 yrs.: 0.011 (0.006 to 0.02)<br>45-49 yrs.: 0.013 (0.0088 to 0.02)<br>50-54 yrs.: 0.033 (0.023 to 0.047)<br>55-59 yrs.: 0.12 (0.099 to 0.15)<br>60-64 yrs.: 0.40 (0.37 to 0.43)<br>65-69 yrs.: Reference<br>70-74 yrs.: 2.05 (1.96 to 2.13)<br>75-79 yrs.: 3.62 (3.41 to 3.85)<br>80-84 yrs.: 5.91 (5.48 to 6.36)<br>85-89 yrs.: 9.38 (8.54 to 10.29) |

| Author, Year (Ref)        | Confounders and age-dependent risk factors used in the model                                                                                                                                                                                                                                                                      | Type of analysis # cases / # non-cases                          | N in analysis Total deaths In age group: # cases/total                                                                                                                                                  | Results Unadjusted effect estimates (if available)                                                                                                                                                                                             | Results Adjusted effect estimates                                                                                                                    |
|---------------------------|-----------------------------------------------------------------------------------------------------------------------------------------------------------------------------------------------------------------------------------------------------------------------------------------------------------------------------------|-----------------------------------------------------------------|---------------------------------------------------------------------------------------------------------------------------------------------------------------------------------------------------------|------------------------------------------------------------------------------------------------------------------------------------------------------------------------------------------------------------------------------------------------|------------------------------------------------------------------------------------------------------------------------------------------------------|
|                           |                                                                                                                                                                                                                                                                                                                                   |                                                                 |                                                                                                                                                                                                         | 65-69 yrs.: Reference<br>70-74 yrs.: 2.30 (2.21 to 2.39)<br>75-79 yrs.: 4.56 (4.30 to 4.82)<br>80-84 yrs.: 8.29 (7.76 to 8.85)<br>85-89 yrs.: 14.69 (13.58 to 15.89)<br>90-94 yrs.: 26.00 (23.62 to 28.62)<br>95+ yrs.: 46.03 (40.97 to 51.71) | 90-94 yrs.: 14.88 (13.25 to 16.70)<br>95+ yrs.: 23.60 (20.52 to 27.16)                                                                               |
| Carrillo-Vega† 2020 (180) | Sex, chronic kidney disease, COPD, diabetes & hypertension & obesity, diabetes & hypertension, diabetes & obesity, only hypertension, only obesity, only diabetes, pneumonia, pregnancy, immune-suppressed, hospitalized, intubated, ICU, health services                                                                         | Logistic regression                                             | N= 9946 (by outcome)<br>N= 10544 (in total)<br>Deaths: 963 (9.7%) (by outcome)<br>Deaths: 968 (9.2%) (in total)<br><25 yrs.: 5/598<br>25-49 yrs.: 255/5640<br>50-74 yrs.: 573/3823<br>≥75 yrs.: 135/483 | NA                                                                                                                                                                                                                                             | Mortality (population based) OR (95% CI)<br>25-49 yrs.: Reference<br>50-74 yrs.: 1.96 (1.63-2.34)<br>≥75 yrs.: 3.74 (2.80-4.98)                      |
| Gu 2020 (214)             | Model 1<br>Sex, pandemic period, comorbidity score (considered coronary heart disease, hypertension, cardiac failure, cerebral infarction, chronic bronchitis, COPD, diabetes, renal failure, history of surgery)<br><br>Model 2<br>Sex, period of the pandemic, coronary heart disease, cerebral infarction, COPD, renal failure | Inverse probability-weighted Cox proportional hazard regression | N= 275<br>Deaths: 94 (21%)<br>Controls: 181                                                                                                                                                             | Population-based mortality HR (95% CI)<br>Age (per year): 1.05 (1.0-1.1)                                                                                                                                                                       | Population-based mortality HR (95% CI)<br>Model 1<br>Age (per year): 1.04 (1.02-1.07)<br>Model 2<br>Age (per year): 1.04 (1.02-1.06)                 |
| Gu 2020 (215)             | Sex, BMI, smoking status, alcohol consumption, race/ethnicity, neighborhood socioeconomic disadvantage index, population density, comorbidity score, respiratory disease, circulatory disease, any cancer, type 2                                                                                                                 | Logistic regression analyses, firth bias-corrected estimates    | N=1139 (Positive tests)<br>Deaths: 88 (7.7%)<br><18 yrs.: 0/9<br>18- <35 yrs.: 2/203<br>35- <50 yrs.: 5/257<br>50- <65 yrs.: 16/349                                                                     | Mortality (population-based) OR (95 % CI)<br>Age (per 10 years): 2.21 (1.87-2.62)<br>Age (per 1-year, own calculation): 1.08 (1.06-1.10)                                                                                                       | Mortality (population-based) OR (95 % CI)<br>Age (per 10 years): 2.31 (1.78-3)<br>Age (per 1-year, own calculation): 1.09 (1.06-1.12)<br><18 yrs.: - |

| Author, Year (Ref)   | Confounders and age-dependent risk factors used in the model                                                                                                                                                                                                                                                                                                                                                                | Type of analysis # cases / # non-cases                                            | N in analysis Total deaths In age group: # cases/total                                                                   | Results Unadjusted effect estimates (if available)                                                                                                                                                                                                                                           | Results Adjusted effect estimates                                                                                                                                                                                                                                                                                                                    |
|----------------------|-----------------------------------------------------------------------------------------------------------------------------------------------------------------------------------------------------------------------------------------------------------------------------------------------------------------------------------------------------------------------------------------------------------------------------|-----------------------------------------------------------------------------------|--------------------------------------------------------------------------------------------------------------------------|----------------------------------------------------------------------------------------------------------------------------------------------------------------------------------------------------------------------------------------------------------------------------------------------|------------------------------------------------------------------------------------------------------------------------------------------------------------------------------------------------------------------------------------------------------------------------------------------------------------------------------------------------------|
|                      | diabetes, kidney disease, liver disease, autoimmune disease                                                                                                                                                                                                                                                                                                                                                                 |                                                                                   | 65- <80 yrs.: 31/233<br>≥80 yrs.: 34/88                                                                                  | <18 yrs.: -<br>18- <35 yrs.: Reference<br>35- <50 yrs.: 1.76 (0.39-7.95)<br>50- <65 yrs.: 3.99 (1.04-15.3)<br>65- <80 yrs.: 12.5 (3.40-46.3)<br>≥80 yrs.: 51.0 (13.6-191)                                                                                                                    | 18- <35 yrs.: Reference<br>35- <50 yrs.: 1.22 (0.166-9.01)<br>50- <65 yrs.: 1.91 (0.33-11)<br>65- <80 yrs.: 6.22 (1.14-33.9)<br>≥80 yrs.: 37.5 (6.71-209)                                                                                                                                                                                            |
| Harrison 2020 (219)  | Sex, ethnicity, comorbidities within the Charlson comorbidity index (myocardial infarction, congestive heart failure, peripheral vascular disease, cerebrovascular disease, dementia, chronic pulmonary disease, rheumatic disease, peptic ulcer disease, mild liver disease, moderate/severe liver disease, diabetes mellitus, hemiplegia or paraplegia, renal disease, any malignancy, metastatic solid tumour, AIDS/HIV) | Logistic regression                                                               | N=31,461<br>Deaths: 1,296 (4.1%)<br><50 yrs.: 104/15,578<br>50-69 yrs.: 430/10,698<br>70-90 yrs.: 762/5,185              | Population-based mortality OR (95% CI)<br>Whole population<br>Age (per year): 1.074 (1.069-1.078)<br>Adults aged <50 yrs.:<br>Age (per year): 1.06 (1.05-1.09)<br>Adults aged 50-69 yrs.:<br>Age (per year): 1.10 (1.08-1.12)<br>Adults aged 70-90 yrs.:<br>Age (per year): 1.03 (1.01-1.04) | Population-based mortality-OR (95% CI)<br>Whole population<br>Age (per year): 1.063 (1.058-1.068)<br>Adults aged <50 yrs.<br>Age (per year): 1.03 (1.01-1.06)<br>Adults aged 50-69 yrs.<br>Age (per year): 1.07 (1.07-1.10)<br>Adults aged 70-90 yrs.<br>Age (per year): 1.02 (1.01-1.04)                                                            |
| Kabarriti 2020 (227) | Sex, socioeconomic status, ethnicity/race, BMI, hypertension, cardiovascular disease, diabetes, cancer, liver disease, dementia, chronic pulmonary disease, peptic ulcer, hemiplegia or paraplegia, kidney disease, HIV/AIDS                                                                                                                                                                                                | Cox proportional hazards models                                                   | N=5902<br>Deaths: 918 (15.5%)<br>≤ 40 yrs.: 27/1255<br>41-60 yrs.: 133/2026<br>61-80 yrs.: 507/2002<br>>80 yrs.: 251/619 | Mortality (population based) OR (95% CI)<br>≤ 40 yrs.: Reference<br>41-60 yrs.: 2.42 (1.60-3.66)<br>61-80 yrs.: 7.63 (5.18-11.2)<br>>80 yrs.: 14.9 (9.98-22.1)                                                                                                                               | Mortality (population based) OR (95% CI)<br>Model 1 (Complete case)<br>≤ 40 yrs.: Reference<br>41-60 yrs.: 1.85 (1.17-2.94)<br>61-80 yrs.: 5.24 (3.37-8.16)<br>>80 yrs.: 9.48 (5.98-15.0)<br><br>Model 2 (Multiple imputation)<br>≤ 40 yrs.: Reference<br>41-60 yrs.: 2.04 (1.34-3.10)<br>61-80 yrs.: 5.47 (3.66-8.18)<br>>80 yrs.: 10.3 (6.75-15.6) |
| Lee 2020 (235)       | Sex, hypertension, diabetes, coronary artery disease, stroke, COPD, any cancer, chronic kidney disease, medication (angiotensin receptor blocker, angiotensin converting enzyme)                                                                                                                                                                                                                                            | Generalized linear mixed-effect regression models, including squared term for age | N= 8,266<br>Deaths: 112 (1.4%)                                                                                           | NA                                                                                                                                                                                                                                                                                           | Population-based mortality within 60 days HR (95% CI)<br>Age per year: 1.372 (1.118-1.683)<br>Age <sup>2</sup> : 0.999 (0.997-1.000)                                                                                                                                                                                                                 |

| Author, Year (Ref) | Confounders and age-dependent risk factors used in the model                                                                                                                                                                                                                                                                                                                                                   | Type of analysis # cases / # non-cases    | N in analysis Total deaths In age group: # cases/total                                                                                                                                                                                                                                                                                                                     | Results Unadjusted effect estimates (if available)                                                                                                                                                                                                                                                                 | Results Adjusted effect estimates                                                                                                                                                                                                                                                                             |
|--------------------|----------------------------------------------------------------------------------------------------------------------------------------------------------------------------------------------------------------------------------------------------------------------------------------------------------------------------------------------------------------------------------------------------------------|-------------------------------------------|----------------------------------------------------------------------------------------------------------------------------------------------------------------------------------------------------------------------------------------------------------------------------------------------------------------------------------------------------------------------------|--------------------------------------------------------------------------------------------------------------------------------------------------------------------------------------------------------------------------------------------------------------------------------------------------------------------|---------------------------------------------------------------------------------------------------------------------------------------------------------------------------------------------------------------------------------------------------------------------------------------------------------------|
|                    |                                                                                                                                                                                                                                                                                                                                                                                                                |                                           |                                                                                                                                                                                                                                                                                                                                                                            |                                                                                                                                                                                                                                                                                                                    |                                                                                                                                                                                                                                                                                                               |
| Reilev 2020 (269)  | Number of comorbidities (0,1,2,3,4+ of chronic lung disease, hypertension, ischaemic heart disease, heart failure, atrial fibrillation, stroke, diabetes, dementia, cancer, chronic liver disease, hospital-diagnosed kidney disease, alcohol abuse, substance abuse, major psychiatric disorders, organ transplantation, medical overweight and obesity, rheumatoid arthritis/connective-tissue disease), sex | Logistic regression                       | N= 11,122 (positive cases, for hospitalization, death within 30 days)<br>Deaths within 30 days of positive test: 577 (5.2%)<br>0-9 yrs.: 0/251<br>10-19 yrs.: 0/495<br>20-29 yrs.: 0/1523<br>30-39 yrs.: NA/1588<br>40-49 yrs.: NA/1970<br>50-59 yrs.: NA/2035<br>30-59: 16/5593<br>60-69 yrs.: 56/1305<br>70-79 yrs.: 165/950<br>80-89 yrs.: 220/762<br>90+ yrs.: 120/243 | Death within 30 days among positive cases OR (95% CI)<br>Unadjusted<br>0-9 yrs.: NA<br>10-19 yrs.: NA<br>20-29 yrs.: NA<br>30-39 yrs.: NA<br>40-49 yrs.: NA<br>50-59 yrs.: Reference<br>60-69 yrs.: 6.0 (3.4-10.7)<br>70-79 yrs.: 28.3 (16.6-48.3)<br>80-89 yrs.: 54.7 (32.1-93.0)<br>90+ yrs.: 131.4 (74.5-231.6) | Death within 30 days among positive cases OR (95% CI)<br>Adjusted<br>0-9 yrs.: NA<br>10-19 yrs.: NA<br>20-29 yrs.: NA<br>30-39 yrs.: NA<br>40-49 yrs.: NA<br>50-59 yrs.: Reference<br>60-69 yrs.: 4.4 (2.5-7.9)<br>70-79 yrs.: 15.2 (8.7-26.3)<br>80-89 yrs.: 29.9 (17.2-51.9)<br>90+ yrs.: 90.2 (50.2-162.2) |
| Rossi 2020 (274)   | Sex, calendar period, time from symptoms to diagnosis, place of birth, Charlson Comorbidity Index                                                                                                                                                                                                                                                                                                              | Cox proportional hazard regression models | N= 2653 COVID-19 cases<br>Deaths (COVID-19 cases): 217 (8.2%)<br><51 yrs.: 2/696<br>51-60 yrs.: 7/528<br>61-70 yrs.: 23/413<br>71-80 yrs.: 54/420<br>≥81 yrs.: 131/596                                                                                                                                                                                                     | NA                                                                                                                                                                                                                                                                                                                 | Population-based mortality HR (95% CI)<br><51 yrs.: Reference<br>51-60 yrs.: 1.5 (0.5-4.2)<br>61-70 yrs.: 3.8 (1.6-9.4)<br>71-80 yrs.: 9.1 (4.0-20.6)<br>≥81 yrs.: 27.8 (12.5-61.7)                                                                                                                           |

| Author, Year (Ref) | Confounders and age-dependent risk factors used in the model                                                                                                                                                                                                                                                                        | Type of analysis # cases / # non-cases                        | N in analysis Total deaths In age group: # cases/total                                                                                                                                                                           | Results Unadjusted effect estimates (if available) | Results Adjusted effect estimates                                                                                                                                                                                                                                                                                                                                                                                                        |
|--------------------|-------------------------------------------------------------------------------------------------------------------------------------------------------------------------------------------------------------------------------------------------------------------------------------------------------------------------------------|---------------------------------------------------------------|----------------------------------------------------------------------------------------------------------------------------------------------------------------------------------------------------------------------------------|----------------------------------------------------|------------------------------------------------------------------------------------------------------------------------------------------------------------------------------------------------------------------------------------------------------------------------------------------------------------------------------------------------------------------------------------------------------------------------------------------|
| Solís 2020 (294)   | Sex, medical unit, week, comorbidities (none or one, two, three or more), hypertension, obesity, cardiovascular disease, diabetes, immunosuppression, COPD, asthma, chronic kidney disease, smoking, other, institution                                                                                                             | Piecewise exponential hazards regression model                | N=7497<br>Deaths: 650 (8.67%)<br>0-24 yrs.: NA<br>25-29 yrs.: NA<br>30-34 yrs.: NA<br>35-39 yrs.: NA<br>40-44 yrs.: NA<br>45-49 yrs.: NA<br>50-54 yrs.: NA<br>55-59 yrs.: NA<br>60-64 yrs.: NA<br>65-69 yrs.: NA<br>70+ yrs.: NA | NA                                                 | Population-based mortality at 35 days<br>HR (95% CI)<br>0-24 yrs.: 0.038 (0.005-0.270)<br>25-29 yrs.: 0.202 (0.104-0.392)<br>30-34 yrs.: 0.218 (0.121-0.394)<br>35-39 yrs.: 0.357 (0.225-0.566)<br>40-44 yrs.: 0.756 (0.530-1.078)<br>45-49 yrs.: Reference<br>50-54 yrs.: 1.171 (0.854-1.605)<br>55-59 yrs.: 1.411 (1.035-1.923)<br>60-64 yrs.: 1.304 (0.926-1.836)<br>65-69 yrs.: 2.016 (1.458-2.787)<br>70+ yrs.: 2.608 (1.931-3.522) |
| Sousa 2020 (295)   | Sex, cardiovascular disease, diabetes, hematologic disease, neurologic disease, obesity, pneumopathies, renal disease                                                                                                                                                                                                               | Robust Poisson regression<br><br>Cox regression               | N=2070<br>Deaths: 131 (6.33%)<br><60 yrs.: 32/1573<br>≥60 yrs.: 99/497                                                                                                                                                           | NA                                                 | Population-based mortality IRR (95% CI)<br><60 yrs.: Reference<br>≥60 yrs.: 3.1 (1.9-5.0)<br><br>Population-based mortality HR (95% CI)<br><60 yrs.: Reference<br>≥60 yrs.: 3.6 (2.3-5.8)                                                                                                                                                                                                                                                |
| Tartof 2020 (300)  | BMI, sex, race/ethnicity, smoking, comorbidities: metastatic tumor/cancer, hyperlipidemia, myocardial infarction, other immune condition, organ transplant, congestive heart failure, peripheral vascular disease, cerebrovascular disease, chronic pulmonary disease, renal disease, hypertension, asthma, diabetes mellitus, time | Poisson regression with multiple imputation for missing data. | N=6916<br>Deaths: 206 (3,0%)<br>0-40 yrs.: 7/2227<br>41-50 yrs.: 10/1422<br>51-60 yrs.: 20/1545<br>61-70 yrs.: 41/1045<br>71-80 yrs.: 53/427<br>>80 yrs.: 75/250                                                                 | NA                                                 | Population-based mortality RR (95% CI)<br>0-40 yrs.: Reference<br>41-50 yrs.: 1.88 (0.71-4.95)<br>51-60 yrs.: 3.14 (1.31-7.57)<br>61-70 yrs.: 7.18 (3.08-16.78)<br>71-80 yrs.: 16.08 (6.72-38.52)<br>>80 yrs.: 43.21 (17.80-104.92)                                                                                                                                                                                                      |
| Wang 2020          | Residential area, smoking status, vital signs, administered medication, asthma,                                                                                                                                                                                                                                                     | Logistic regression                                           | N=7592 (total)<br>N=6764 (analysis)                                                                                                                                                                                              | Population-based mortality OR (95% CI)             | Population-based mortality OR (95% CI)                                                                                                                                                                                                                                                                                                                                                                                                   |



| Author, Year<br>(Ref)                                                                                                                                                                                                                                                       | Confounders and age-dependent risk factors used in the model                                                                                                   | Type of analysis<br># cases / # non-cases | N in analysis<br>Total deaths<br>In age group: # cases/total                                                                                                | Results<br>Unadjusted effect estimates (if available)                                                                                                                                         | Results<br>Adjusted effect estimates                                                                                                                                                     |
|-----------------------------------------------------------------------------------------------------------------------------------------------------------------------------------------------------------------------------------------------------------------------------|----------------------------------------------------------------------------------------------------------------------------------------------------------------|-------------------------------------------|-------------------------------------------------------------------------------------------------------------------------------------------------------------|-----------------------------------------------------------------------------------------------------------------------------------------------------------------------------------------------|------------------------------------------------------------------------------------------------------------------------------------------------------------------------------------------|
| (302)                                                                                                                                                                                                                                                                       | chronic kidney disease, number of comorbidities (0, 1-3, 4+)<br>Most prevalent; hypertension, diabetes, chronic kidney disease, obesity, cancer, asthma, COPD. |                                           | Deaths: 828 (10.9%)<br><40 yrs.: 10/1590<br>40-49 yrs.: 33/940<br>50-59 yrs.: 80/1306<br>60-69 yrs.: 167/1583<br>70-79 yrs.: 217/1137<br>80+ yrs.: 321/1036 | <40 yrs.: Reference<br>40-49 yrs.: 5.75 (2.82-11.72)<br>50-59 yrs.: 10.31 (5.32-19.98)<br>60-69 yrs.: 18.63 (9.81-35.41)<br>70-79 yrs.: 37.27 (19.67-70.61)<br>80+ yrs.: 70.93 (37.57-133.93) | <40 yrs.: Reference<br>40-49 yrs.: 3.48 (1.48-8.17)<br>50-59 yrs.: 5.53 (2.51-12.19)<br>60-69 yrs.: 8.44 (3.90-18.26)<br>70-79 yrs.: 18.29 (8.46-39.51)<br>80+ yrs.: 33.77 (15.66-72.84) |
| †: same study population<br>ICU: intensive care unit; COPD: chronic obstructive pulmonary disease; BMI: body mass index; yrs.: years; SOFA score: sequential organ failure assessment score; OR: odds ratio; HR: hazards ratio; CI: confidence intervals; NA: not available |                                                                                                                                                                |                                           |                                                                                                                                                             |                                                                                                                                                                                               |                                                                                                                                                                                          |

Table S6. Risk of bias summary for studies investigating case mortality

| Study                                                                                                                                                                                                                                                                                                                     | Major domains         |                     |                               |             |                 | Minor domains |         |                      | OVERALL |
|---------------------------------------------------------------------------------------------------------------------------------------------------------------------------------------------------------------------------------------------------------------------------------------------------------------------------|-----------------------|---------------------|-------------------------------|-------------|-----------------|---------------|---------|----------------------|---------|
|                                                                                                                                                                                                                                                                                                                           | Recruitment procedure | Exposure assessment | Outcome source and validation | Confounding | Analysis method | Chronology    | Funding | Conflict of interest |         |
| Bello-Chavolla et al. 2020 (170)                                                                                                                                                                                                                                                                                          | ✓                     | ✗                   | ✓                             | ✗           | ✓               | ✓             | ⚠       | ✓                    | ✗       |
| Boulle et al. 2020 (176)                                                                                                                                                                                                                                                                                                  | ✓                     | ✓                   | ✓                             | ✗           | ✓               | ✓             | ✓       | ✗                    | ✗       |
| Burn et al. 2020 (177)                                                                                                                                                                                                                                                                                                    | ✓                     | ✓                   | ✓                             | ✓           | ✓               | ✓             | ✓       | ✗                    | ✓       |
| Carrillo-Vega et al. 2020 (180)                                                                                                                                                                                                                                                                                           | ✓                     | ✗                   | ✓                             | ✗           | ✓               | ✗             | ✓       | ✓                    | ✗       |
| Gu et al. 2020 (214)                                                                                                                                                                                                                                                                                                      | ✗                     | ✓                   | ✓                             | ✗           | ✓               | ✓             | ✓       | ✓                    | ✗       |
| Gu et al. 2020 (215)                                                                                                                                                                                                                                                                                                      | ✓                     | ✓                   | ✓                             | ✓           | ✓               | ✓             | ✓       | ✗                    | ✓       |
| Harrison et al. 2020 (219)                                                                                                                                                                                                                                                                                                | ✗                     | ✓                   | ✓                             | ✓           | ✓               | ✓             | ✓       | ✗                    | ✓       |
| Kabarriti et al. 2020 (227)                                                                                                                                                                                                                                                                                               | ✗                     | ✗                   | ✓                             | ✓           | ✓               | ✓             | ⚠       | ✓                    | ✗       |
| Lee et al. 2020 (235)                                                                                                                                                                                                                                                                                                     | ✓                     | ✓                   | ✓                             | ✗           | ✓               | ✓             | ✓       | ✓                    | ✗       |
| Rossi et al. 2020 (274)                                                                                                                                                                                                                                                                                                   | ✗                     | ✓                   | ✓                             | ✗           | ✓               | ✓             | ✓       | ✓                    | ✗       |
| Solis et al. 2020 (294)                                                                                                                                                                                                                                                                                                   | ✓                     | ✓                   | ✓                             | ✗           | ✓               | ✓             | ⚠       | ⚠                    | ✗       |
| Sousa et al. 2020 (295)                                                                                                                                                                                                                                                                                                   | ✓                     | ✗                   | ✓                             | ✗           | ✓               | ✓             | ✓       | ✓                    | ✗       |
| Tartof et al. 2020 (300)                                                                                                                                                                                                                                                                                                  | ✓                     | ✓                   | ✓                             | ✗           | ✓               | ✓             | ✓       | ✓                    | ✗       |
| Wang et al. 2020 (302)                                                                                                                                                                                                                                                                                                    | ✓                     | ✓                   | ✓                             | ✗           | ✓               | ✗             | ✓       | ✓                    | ✗       |
|  = low risk of bias  = unclear risk of bias  = high risk of bias |                       |                     |                               |             |                 |               |         |                      |         |

**Figure S6. Relationship between median age and log relative risk among studies using age as a categorical value (linear and cubic models, variance weighted): case mortality**

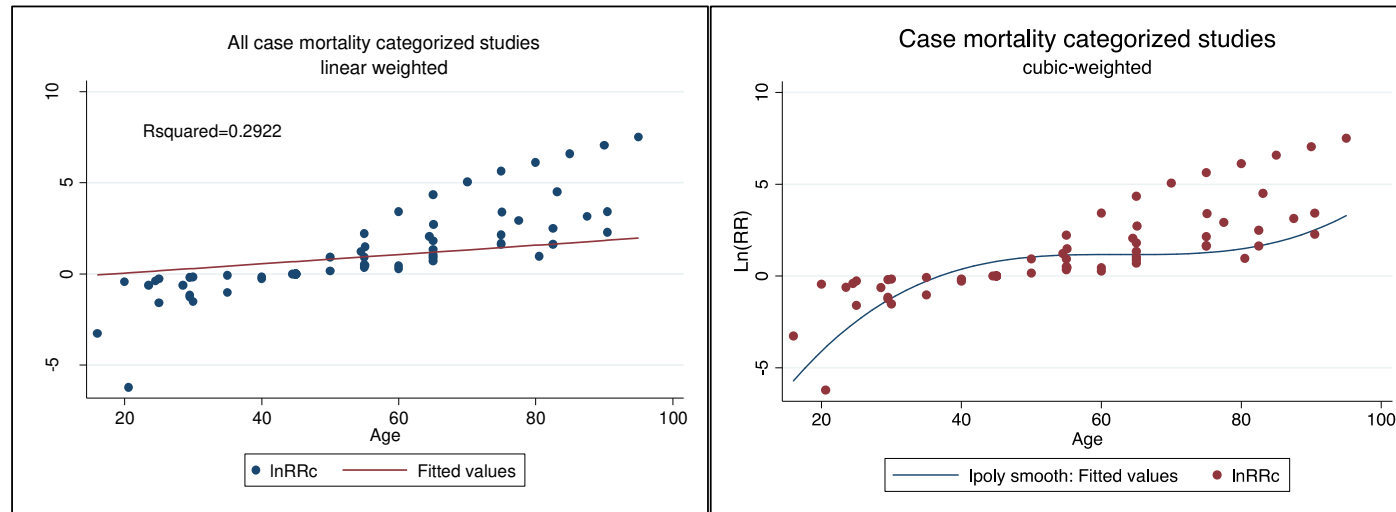

Figure S7. Funnel plot of studies investigating case mortality

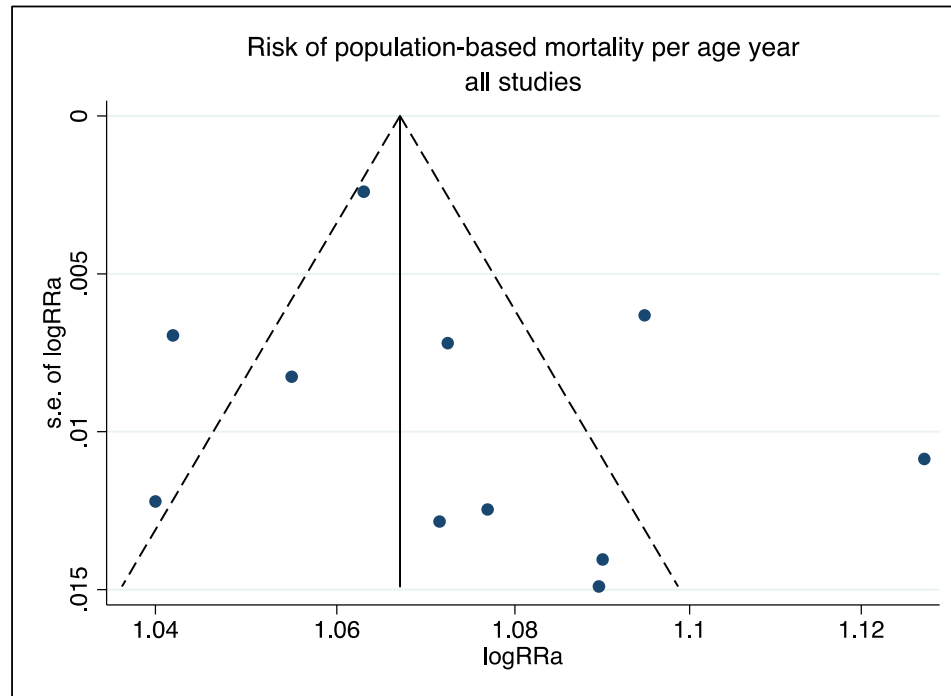

Table S7. Results of studies investigating risk of hospitalization

| Author, Year (Ref) | Confounders and age-dependent risk factors used in the model                                                                                                                                                                                                                                                               | Type of analysis                                                                          | N in analysis<br>Total hospitalized<br>In age group: # cases/total                                                                                                                                                                                                                                               | Results<br>Unadjusted effect estimates (if available)                                                                                                                                                                                                                                                                                                                                                                                                                                                                                                                                                     | Results<br>Adjusted effect estimates                                                                                                                                                                                                                                                                                                                                                                                                                                                                                                                                                                             |
|--------------------|----------------------------------------------------------------------------------------------------------------------------------------------------------------------------------------------------------------------------------------------------------------------------------------------------------------------------|-------------------------------------------------------------------------------------------|------------------------------------------------------------------------------------------------------------------------------------------------------------------------------------------------------------------------------------------------------------------------------------------------------------------|-----------------------------------------------------------------------------------------------------------------------------------------------------------------------------------------------------------------------------------------------------------------------------------------------------------------------------------------------------------------------------------------------------------------------------------------------------------------------------------------------------------------------------------------------------------------------------------------------------------|------------------------------------------------------------------------------------------------------------------------------------------------------------------------------------------------------------------------------------------------------------------------------------------------------------------------------------------------------------------------------------------------------------------------------------------------------------------------------------------------------------------------------------------------------------------------------------------------------------------|
| Azar 2020 (167)    | Adjusted Model 2:<br>Race/ethnicity, sex, homeless status, smoking status, type 2 diabetes, hypertension, depression, congestive heart failure, cardiovascular disease, cancer, chronic obstructive pulmonary disease, asthma<br><br>Adjusted Model 3:<br>Confounders in adjusted model 2 plus insurance status and income | Logistic regression<br>Models built stepwise that incrementally included more covariates. | N= 1052<br>Admitted to hospital: 256 (24.3%)<br><br>18-29 yrs. 2/115<br>30-39 yrs. 19/170<br>18-39 yrs. 21/285<br>40-49 yrs. 25/174<br>50-59 yrs. 41/201<br>60-69 yrs. 62/184<br>70-79 yrs. 47/114<br>80+ yrs. 60/94                                                                                             | Hospital admission<br><br>Unadjusted Model<br>18-39 yrs. Reference<br>40-49 yrs.: OR= 2.11 (1.14, 3.90)<br>50-59 yrs.: OR= 3.22 (1.84, 5.65)<br>60-69 yrs.: OR= 6.39 (3.72, 10.96)<br>70-79 yrs.: OR= 8.82 (4.94, 15.75)<br>80+ yrs.: OR= 22.18 (12.03, 40.91)                                                                                                                                                                                                                                                                                                                                            | Hospital admission<br>Model 2<br>18-39 yrs. Reference<br>40-49 yrs.: OR= 1.91 (95% CI: 1.00-3.65)<br>50-59 yrs.: OR= 2.04 (95% CI: 1.10-3.78)<br>60-69 yrs.: OR= 3.88 (95% CI: 2.10-7.17)<br>70-79 yrs.: OR= 5.20 (95% CI: 2.61-10.34)<br>80+ yrs.: OR= 12.94 (95% CI: 6.14-27.26)<br>Model 3<br>18-39 yrs. Reference<br>40-49 yrs.: OR= 2.24 (95% CI: 1.13-4.43)<br>50-59 yrs.: OR= 2.62 (95% CI: 1.37-4.99)<br>60-69 yrs.: OR= 4.62 (95% CI: 2.39-9.95)<br>70-79 yrs.: OR= 5.68 (95% CI: 2.60-12.38)<br>80+ yrs.: OR= 19.08 (95% CI: 7.86-46.32)                                                               |
| Burn 2020 (177)    | Autoimmune condition, chronic kidney disease, COPD, dementia, heart disease, hyperlipidemia, hypertension, malignant neoplasm, obesity, Type 2 diabetes, Charlson Index                                                                                                                                                    | Cox proportional hazards model using a non-linear relationship with age                   | Hospitalized with COVID-19 from general population: 8,582<br>Hospitalized from outpatient diagnosis: 9,437<br>From outpatient diagnosis:<br>20-24 yrs.<br>25-29 yrs.<br>30-34 yrs.<br>35-39 yrs.<br>40-44 yrs.<br>45-49 yrs.<br>50-54 yrs.<br>55-59 yrs.<br>60-64 yrs.<br>65-69 yrs.<br>70-74 yrs.<br>75-79 yrs. | Hazard ratios (95% CIs)<br>Hospitalized with COVID-19 from general population<br>Age only model:<br>20-24 yrs.: 0.037 (0.032 to 0.042)<br>25-29 yrs.: 0.058 (0.052 to 0.064)<br>30-34 yrs.: 0.089 (0.082 to 0.096)<br>35-39 yrs.: 0.13 (0.13 to 0.14)<br>40-44 yrs.: 0.20 (0.19 to 0.21)<br>45-49 yrs.: 0.28 (0.27 to 0.29)<br>50-54 yrs.: 0.40 (0.39 to 0.41)<br>55-59 yrs.: 0.56 (0.55 to 0.56)<br>60-64 yrs.: 0.75 (0.75 to 0.76)<br>65-69 yrs.: Reference<br>70-74 yrs.: 1.30 (1.29 to 1.31)<br>75-79 yrs.: 1.65 (1.63 to 1.68)<br>80-84 yrs.: 2.06 (2.01 to 2.11)<br>85-89 yrs.: 2.51 (2.42 to 2.61) | Hazard ratios (95% CIs)<br>Hospitalized with COVID-19 from general population<br>Age and comorbidity model:<br>20-24 yrs.: 0.063 (0.055 to 0.072)<br>25-29 yrs.: 0.094 (0.085 to 0.11)<br>30-34 yrs.: 0.14 (0.13 to 0.15)<br>35-39 yrs.: 0.20 (0.19 to 0.21)<br>40-44 yrs.: 0.28 (0.26 to 0.29)<br>45-49 yrs.: 0.38 (0.36 to 0.39)<br>50-54 yrs.: 0.50 (0.49 to 0.51)<br>55-59 yrs.: 0.64 (0.63 to 0.66)<br>60-64 yrs.: 0.81 (0.81 to 0.82)<br>65-69 yrs.: Reference<br>70-74 yrs.: 1.20 (1.19 to 1.21)<br>75-79 yrs.: 1.40 (1.38 to 1.43)<br>80-84 yrs.: 1.60 (1.55 to 1.65)<br>85-89 yrs.: 1.78 (1.70 to 1.87) |

| Author, Year (Ref)                | Confounders and age-dependent risk factors used in the model                                                                                                                                  | Type of analysis            | N in analysis<br>Total hospitalized<br>In age group: # cases/total                                              | Results<br>Unadjusted effect estimates (if available)                                                                                                                                                                                                                                                                                                                                                                                                                                                                                                                                                                                                                                                                                 | Results<br>Adjusted effect estimates                                                                                                                                                                                                                                                                                                                                                                                                                                                                                                                                                                                                                                                                                                         |
|-----------------------------------|-----------------------------------------------------------------------------------------------------------------------------------------------------------------------------------------------|-----------------------------|-----------------------------------------------------------------------------------------------------------------|---------------------------------------------------------------------------------------------------------------------------------------------------------------------------------------------------------------------------------------------------------------------------------------------------------------------------------------------------------------------------------------------------------------------------------------------------------------------------------------------------------------------------------------------------------------------------------------------------------------------------------------------------------------------------------------------------------------------------------------|----------------------------------------------------------------------------------------------------------------------------------------------------------------------------------------------------------------------------------------------------------------------------------------------------------------------------------------------------------------------------------------------------------------------------------------------------------------------------------------------------------------------------------------------------------------------------------------------------------------------------------------------------------------------------------------------------------------------------------------------|
|                                   |                                                                                                                                                                                               |                             | 80-84 yrs.<br>85-89 yrs.<br>90-94 yrs.<br>95+ yrs.                                                              | 90-94 yrs.: 3.00 (2.84 to 3.16)<br>95+ yrs.: 3.51 (3.27 to 3.76)<br><br>Hazard ratios (95% CIs)<br>Hospitalized from outpatient diagnosis<br>Age only model:<br>20-24 yrs.: 0.076 (0.067 to 0.086)<br>25-29 yrs.: 0.099 (0.091 to 0.11)<br>30-34 yrs.: 0.13 (0.12 to 0.14)<br>35-39 yrs.: 0.16 (0.15 to 0.17)<br>40-44 yrs.: 0.19 (0.18 to 0.20)<br>45-49 yrs.: 0.24 (0.22 to 0.25)<br>50-54 yrs.: 0.34 (0.32 to 0.36)<br>55-59 yrs.: 0.53 (0.51 to 0.55)<br>60-64 yrs.: 0.79 (0.78 to 0.80)<br>65-69 yrs.: Reference<br>70-74 yrs.: 1.10 (1.09 to 1.11)<br>75-79 yrs.: 1.07 (1.05 to 1.09)<br>80-84 yrs.: 0.97 (0.94 to 1.00)<br>85-89 yrs.: 0.83 (0.79 to 0.87)<br>90-94 yrs.: 0.70 (0.65 to 0.74)<br>95+ yrs.: 0.58 (0.54 to 0.64) | 90-94 yrs.: 1.93 (1.81 to 2.06)<br>95+ yrs.: 2.05 (1.88 to 2.23)<br><br>Hazard ratios (95% CIs)<br>Hospitalized from outpatient diagnosis<br>Age and comorbidity model:<br>20-24 yrs.: 0.092 (0.08 to 0.10)<br>25-29 yrs.: 0.12 (0.11 to 0.13)<br>30-34 yrs.: 0.15 (0.14 to 0.16)<br>35-39 yrs.: 0.19 (0.18 to 0.20)<br>40-44 yrs.: 0.23 (0.21 to 0.24)<br>45-49 yrs.: 0.28 (0.26 to 0.30)<br>50-54 yrs.: 0.39 (0.36 to 0.41)<br>55-59 yrs.: 0.58 (0.55 to 0.60)<br>60-64 yrs.: 0.81 (0.80 to 0.83)<br>65-69 yrs.: Reference<br>70-74 yrs.: 1.09 (1.08 to 1.10)<br>75-79 yrs.: 1.07 (1.05 to 1.10)<br>80-84 yrs.: 0.99 (0.95 to 1.03)<br>85-89 yrs.: 0.87 (0.82 to 0.92)<br>90-94 yrs.: 0.75 (0.70 to 0.82)<br>95+ yrs.: 0.65 (0.59 to 0.72) |
| Carrillo-Vega†<br>2020<br>(180)   | Sex, chronic kidney disease, COPD, diabetes & hypertension & obesity, diabetes & hypertension, diabetes & obesity, only hypertension, only obesity, only diabetes, pneumonia, health services | Logistic regression         | N= 9946<br>Hospitalization:<br>3922 (39.4%)<br>25-49 yrs. 1532/5640<br>50-74 yrs. 2040/3823<br>≥75 yrs. 350/483 | NA                                                                                                                                                                                                                                                                                                                                                                                                                                                                                                                                                                                                                                                                                                                                    | Risk of hospitalization in COVID-19 positive cases OR (95% CI)<br>25-49 yrs.: Reference<br>50-74 yrs.: 2.05 (1.81-2.32)<br>≥75 yrs.: 3.84 (2.90-5.10)                                                                                                                                                                                                                                                                                                                                                                                                                                                                                                                                                                                        |
| Cchiba and Patel<br>2020<br>(186) | Sex, asthma, race, smoking, obesity, hypertension, diabetes, obstructive sleep apnea, coronary artery disease, COPD, allergic rhinitis, rhinosinusitis, immunodeficiency                      | Poisson regression          | N= 1526<br>Hospitalized: 853 (55.9%)<br><40 yrs.: NA/414<br>40-69 yrs. NA/844<br>≥70 yrs.: NA/268               | NA                                                                                                                                                                                                                                                                                                                                                                                                                                                                                                                                                                                                                                                                                                                                    | Risk of hospitalization RR (95% CI)<br><40 yrs.: 0.50 (0.38-0.64)<br>40-69 yrs. 0.76 (0.64-0.91)<br>≥70 yrs.: Reference                                                                                                                                                                                                                                                                                                                                                                                                                                                                                                                                                                                                                      |
| Ebinger<br>2020                   | Sex, race, ethnicity, obesity, hypertension, diabetes mellitus, Elixhauser comorbidity score, prior                                                                                           | Ordinal logistic regression | N= 442<br>Not Admitted:<br>228 (51.58%)                                                                         | Population-based severe illness (Hospitalization) OR (95% CI)                                                                                                                                                                                                                                                                                                                                                                                                                                                                                                                                                                                                                                                                         | Population-based severe illness (Hospitalization) OR (95% CI)                                                                                                                                                                                                                                                                                                                                                                                                                                                                                                                                                                                                                                                                                |

| Author, Year (Ref)     | Confounders and age-dependent risk factors used in the model                                                                                                                                                                                                                  | Type of analysis                                             | N in analysis<br>Total hospitalized<br>In age group: # cases/total                                                                                                | Results<br>Unadjusted effect estimates (if available)                                                                                                                                                                                                                                                         | Results<br>Adjusted effect estimates                                                                                                                                                                                                                                                                    |
|------------------------|-------------------------------------------------------------------------------------------------------------------------------------------------------------------------------------------------------------------------------------------------------------------------------|--------------------------------------------------------------|-------------------------------------------------------------------------------------------------------------------------------------------------------------------|---------------------------------------------------------------------------------------------------------------------------------------------------------------------------------------------------------------------------------------------------------------------------------------------------------------|---------------------------------------------------------------------------------------------------------------------------------------------------------------------------------------------------------------------------------------------------------------------------------------------------------|
| (201)                  | myocardial infarction or heart failure, prior COPD or asthma, ACE inhibitor use, angiotensin receptor blocker use                                                                                                                                                             |                                                              | Admitted, Non-ICU:<br>137 (31%)                                                                                                                                   | <i>(Three interesting categories not together, difficult to compare for M.A.)</i><br>Age (per 10 years):<br>1.68 (1.52-1.87)                                                                                                                                                                                  | <i>(Three interesting categories not together, difficult to compare for M.A.)</i><br>Age (per 10 years): 1.49 (1.30-1.70)                                                                                                                                                                               |
| Giannouchos 2020 (210) | Gender, Mexican, smoker, chronic renal disease, diabetes, immunosuppression, COPD, obese, hypertension, cardiovascular disease, asthma, medical unit is a monitoring health unit for respiratory diseases (USMER), type of facility                                           | Logistic regression analyses                                 | N = 89,756<br>Hospitalizations:<br>0-17 yrs.: 344/1885<br>18-44 yrs.: 7505/41,288<br>45-64 yrs.: 15,073/34,377<br>≥65 yrs.: 8349/12,207                           | NA                                                                                                                                                                                                                                                                                                            | Hospitalization OR (95% CI)<br>0-17 yrs.: 1.73 (1.39-2.14)<br>18-44 yrs.: Reference<br>45-64 yrs.: 2.93 (2.76-3.12)<br>≥65 yrs.: 7.24 (6.22-8.42)                                                                                                                                                       |
| Gu 2020 (215)          | Sex, BMI, smoking status, alcohol consumption, race/ethnicity, neighborhood socioeconomic disadvantage index, population density, comorbidity score, respiratory disease, circulatory disease, any cancer, type 2 diabetes, kidney disease, liver disease, autoimmune disease | Logistic regression analyses, firth bias-corrected estimates | N= 765<br>Hospitalized: 270<br><18 yrs.: 4/9<br>18- <35 yrs.: 38/203<br>35- <50 yrs.: 83/257<br>50- <65 yrs.: 171/349<br>65- <80 yrs.: 154/233<br>≥80 yrs.: 73/88 | Hospitalization OR (95% CI)<br>Age (per 10 years):<br>1.69 (1.56-1.84)<br>Age (per year):<br>1.054 (1.045-1.063)<br><18 yrs.: 3.52 (0.90-13.7)<br>18- <35 yrs.: Reference<br>35- <50 yrs.: 2.06 (1.33-3.19)<br>50- <65 yrs.: 4.13 (2.74-6.22)<br>65- <80 yrs.: 8.68 (5.56-13.6)<br>≥80 yrs.: 25.3 (12.6-50.8) | Hospitalization OR (95% CI)<br>Age (per 10 years): 1.72 (1.53-1.93)<br>Age (per year): 1.056 (1.043-1.068)<br><18 yrs.: 1.60 (0.21-12.4)<br>18- <35 yrs.: Reference<br>35- <50 yrs.: 1.70 (0.90-3.22)<br>50- <65 yrs.: 3.65 (2.01-6.61)<br>65- <80 yrs.: 6.61 (3.49-12.6)<br>≥80 yrs.: 31.6 (12.7-78.5) |
| Killerby 2020 (230)    | Sex, race, obesity, smoking, insurance status, hypertension, diabetes, chronic kidney disease, cardiovascular disease, chronic respiratory disease                                                                                                                            | Multivariable logistic regression                            | N=531<br>Hospitalized: 220 (41.4%)<br>18-44 yrs. 54/205<br>45-65 yrs. 76/196<br>≥65 yrs. 90/130                                                                   | NA                                                                                                                                                                                                                                                                                                            | Hospitalization OR 95% CIs<br>18-44 yrs.: Reference<br>45-65 yrs.: 1.0 (CIs not provided)<br>≥65 yrs.: 3.4 (1.6-7.4)                                                                                                                                                                                    |
| Merzon 2020 (249)      | Low vitamin D level, sex, SES, smoking, depression/anxiety, schizophrenia, dementia, diabetes, hypertension, cardiovascular disease, chronic lung disorders, BMI                                                                                                              | Logistic regression                                          | N= 782<br>Hospitalizations: NA<br>Age distribution: NA                                                                                                            | Hospitalization OR (95% CI)<br>≤50 years: Reference<br>>50 years: 2.51 (1.21-4.89)                                                                                                                                                                                                                            | Hospitalization OR (95% CI)<br>≤50 years: Reference<br>>50 years: 2.71 (1.55-4.78)                                                                                                                                                                                                                      |
| Petrilli 2020 (263)    | Week, race/ethnicity, smoking status, BMI, coronary artery disease, heart failure, hyperlipidemia, hypertension,                                                                                                                                                              | Mixed effects logistic regression models for                 | N= 5279<br>Hospitalization:<br>2741 (51.9%)<br>19-44 yrs.: 436/1846                                                                                               | Hospital admission: OR (95% CIs)<br>Unadjusted<br>19-44 yrs.: Reference<br>45-54 yrs.: 2.69 (2.27-3.18)                                                                                                                                                                                                       | Hospital admission: OR (95% CIs)<br>Adjusted<br>19-44 yrs.: Reference<br>45-54 yrs.: 2.14 (1.76-2.59)                                                                                                                                                                                                   |

| Author, Year (Ref)       | Confounders and age-dependent risk factors used in the model                                                                                                                                                                                                                                                                                                                                                                                                                | Type of analysis                     | N in analysis<br>Total hospitalized<br>In age group: # cases/total                                                                                                                                                                                                          | Results<br>Unadjusted effect estimates (if available)                                                                                                                                                                                                                                                                                                     | Results<br>Adjusted effect estimates                                                                                                                                                                                                                                                                                                                   |
|--------------------------|-----------------------------------------------------------------------------------------------------------------------------------------------------------------------------------------------------------------------------------------------------------------------------------------------------------------------------------------------------------------------------------------------------------------------------------------------------------------------------|--------------------------------------|-----------------------------------------------------------------------------------------------------------------------------------------------------------------------------------------------------------------------------------------------------------------------------|-----------------------------------------------------------------------------------------------------------------------------------------------------------------------------------------------------------------------------------------------------------------------------------------------------------------------------------------------------------|--------------------------------------------------------------------------------------------------------------------------------------------------------------------------------------------------------------------------------------------------------------------------------------------------------------------------------------------------------|
|                          | diabetes, asthma or COPD, chronic kidney disease, cancer, sex                                                                                                                                                                                                                                                                                                                                                                                                               | admission to hospital                | 45-54 yrs.: 410/902<br>55-64 yrs.: 605/1021<br>65-74 yrs.: 621/797<br>≥75 yrs.: 668/713                                                                                                                                                                                     | 55-64 yrs.: 4.69 (3.98-5.53)<br>65-74 yrs.: 11.38 (9.33-13.88)<br>≥75 yrs.: 47.84 (34.73-65.91)                                                                                                                                                                                                                                                           | 55-64 yrs.: 3.67 (3.01-4.48)<br>65-74 yrs.: 8.7 (6.77-11.22)<br>≥75 yrs.: 37.87 (26.1-56.03)                                                                                                                                                                                                                                                           |
| Price-Haywood 2020 (266) | Race, sex, Charlson Comorbidity Index score, low-income residency, insurance, obesity                                                                                                                                                                                                                                                                                                                                                                                       | Hospitalization: logistic regression | N=3481<br>Admitted to hospital: 1382 (39.7%)                                                                                                                                                                                                                                | Hospitalization: OR (95% CI)<br>Adjusted for race and sex:<br>Per 5-yr. unit increase: 1.34 (1.30-1.37)<br>Per yr. increase: 1.06(1.05-1.06)                                                                                                                                                                                                              | Hospitalization: OR (95% CI)<br>Fully adjusted:<br>Per 5-yr. unit increase: 1.29 (1.25-1.33)<br>Per yr. increase: 1.052(1.045-1.059)                                                                                                                                                                                                                   |
| Reilev 2020 (269)        | Number of comorbidities (0,1,2,3,4+ of chronic lung disease, hypertension, ischaemic heart disease, heart failure, atrial fibrillation, stroke, diabetes, dementia, cancer, chronic liver disease, hospital-diagnosed kidney disease, alcohol abuse, substance abuse, major psychiatric disorders, organ transplantation, medical overweight and obesity, rheumatoid arthritis/connective-tissue disease), sex                                                              | Logistic regression                  | N= 11,122<br>Hospitalization: 2254 (20%)<br>0-9 yrs.: 11/251<br>10-19 yrs.: 14/495<br>20-29 yrs.: 55/1523<br>30-39 yrs.: 90/1588<br>40-49 yrs.: 192/1970<br>50-59 yrs.: 337/2035<br>60-69 yrs.: 374/1305<br>70-79 yrs.: 578/950<br>80-89 yrs.: 476/762<br>90+ yrs.: 127/243 | Hospitalization among positive cases OR (95% CI)<br>Unadjusted<br>0-9 yrs.: 0.2 (0.1-0.4)<br>10-19 yrs.: 0.1 (0.1-0.3)<br>20-29 yrs.: 0.2 (0.1-0.3)<br>30-39 yrs.: 0.3 (0.2-0.4)<br>40-49 yrs.: 0.5 (0.5-0.7)<br>50-59 yrs.: Reference<br>60-69 yrs.: 2.0 (1.7-2.4)<br>70-79 yrs.: 7.8 (6.6-9.3)<br>80-89 yrs.: 8.4 (7.0-10.1)<br>90+ yrs.: 5.5 (4.2-7.3) | Hospitalization among positive cases OR (95% CI)<br>Adjusted<br>0-9 yrs.: 0.3 (0.2-0.6)<br>10-19 yrs.: 0.2 (0.1-0.3)<br>20-29 yrs.: 0.2 (0.2-0.3)<br>30-39 yrs.: 0.4 (0.3-0.5)<br>40-49 yrs.: 0.6 (0.5-0.8)<br>50-59 yrs.: Reference<br>60-69 yrs.: 1.6 (1.3-1.9)<br>70-79 yrs.: 4.7 (3.9-5.7)<br>80-89 yrs.: 4.8 (3.9-5.8)<br>90+ yrs.: 3.5 (2.6-4.7) |
| Rentsch 2020 (270)       | Adjusted model 1:<br>Race, baseline comorbidities (chronic kidney disease, COPD, diabetes, hypertension, vascular disease), Medication history in year prior to test date (angiotensin converting enzyme inhibitor or angiotensin II receptor blocker, nonsteroidal anti-inflammatory drug), vital signs (systolic blood pressure, oxygen saturation, pulse, temperature), laboratory findings (albumin, eGFR, FIB-4, Hemoglobin, White blood cell count, Lymphocyte count) | Logistic regression                  | N= 585<br>Hospitalization: 297 (50.8%)<br>54-59 yrs.: 58/135<br>60-64 yrs.: 62/135<br>65-69 yrs.: 62/120<br>70-75 yrs.: 115/195                                                                                                                                             | Hospitalization: OR (95% CI)<br>Per 5-yr. increase: 1.26 (1.10-1.44)<br>Per yr. increase: 1.04 (1.02-1.08)                                                                                                                                                                                                                                                | Hospitalization: OR (95% CI)<br><br>Model 1:<br>Per 5-yr. increase: 0.87 (0.71-1.05)<br>Per yr. increase: 0.97 (0.93-1.01)<br><br>Model 2:<br>Per 5-yr. increase: 0.64 (0.51-0.80)<br>Per yr. increase: 0.91 (0.87-0.96)                                                                                                                               |



| Author, Year (Ref)                                                                                                                                                                                                                              | Confounders and age-dependent risk factors used in the model                                                                                                                                                                                                                                                                                                                                | Type of analysis                          | N in analysis<br>Total hospitalized<br>In age group: # cases/total                                                                                  | Results<br>Unadjusted effect estimates (if available)                                                                | Results<br>Adjusted effect estimates                                                                                                                                  |
|-------------------------------------------------------------------------------------------------------------------------------------------------------------------------------------------------------------------------------------------------|---------------------------------------------------------------------------------------------------------------------------------------------------------------------------------------------------------------------------------------------------------------------------------------------------------------------------------------------------------------------------------------------|-------------------------------------------|-----------------------------------------------------------------------------------------------------------------------------------------------------|----------------------------------------------------------------------------------------------------------------------|-----------------------------------------------------------------------------------------------------------------------------------------------------------------------|
|                                                                                                                                                                                                                                                 | Adjusted model 2:<br>Race, baseline comorbidities (chronic kidney disease, COPD, diabetes, hypertension, vascular disease), Medication history in year prior to test date (angiotensin converting enzyme inhibitor or angiotensin II receptor blocker, nonsteroidal anti-inflammatory drug), vital signs (systolic blood pressure, oxygen saturation, pulse, temperature), VACS Index score |                                           |                                                                                                                                                     |                                                                                                                      |                                                                                                                                                                       |
| Rossi 2020 (274)                                                                                                                                                                                                                                | Sex, calendar period, time from symptoms to diagnosis, place of birth, Charlson Comorbidity Index                                                                                                                                                                                                                                                                                           | Cox proportional hazard regression models | N=2653<br>Hospitalized: 1075 (40.5%)<br><51 yrs.: 107/696<br>51-60 yrs.: 128/528<br>61-70 yrs.: 205/413<br>71-80 yrs.: 291/420<br>≥81 yrs.: 344/596 | NA                                                                                                                   | Hospitalization HR (95% CIs)<br><51 yrs.: Reference<br>51-60 yrs.: 1.3 (1.0-1.8)<br>71-70 yrs.: 3.2 (2.4-4.1)<br>71-80 yrs.: 5.9 (4.5-7.6)<br>≥81 yrs.: 7.1 (5.4-9.3) |
| Soares 2020 (293)                                                                                                                                                                                                                               | Sex, race, cardiovascular disease, diabetes, kidney disease, obesity, pulmonary disease, smoking, fever, headache, runny nose, shortness of breath, sore throat                                                                                                                                                                                                                             | Logistic regression                       | N=10,713<br>Hospitalized: 1152 (10.8%)<br><60 yrs.: 546/8676<br>≥60 yrs.: 606/2037                                                                  | Hospitalization due to COVID-19 OR (95% CIs)<br><60 yrs.: Reference<br>≥60 yrs.: 6.31 (5.55-7.17)                    | Hospitalization due to COVID-19 OR (95% CIs)<br><60 yrs.: Reference<br>≥60 yrs.: 3.40 (2.91-3.96)                                                                     |
| van Gerwen 2020 (301)                                                                                                                                                                                                                           | Sex, race, smoking, BMI, hypertension, coronary artery disease, atrial fibrillation, congestive heart failure, peripheral vascular disease, cerebrovascular accident/transient ischemic attack, dementia, diabetes, hypothyroidism, chronic kidney disease, malignancy, asthma, COPD, prior venous thromboembolism                                                                          | Logistic regression                       | N= 3703<br>Hospitalized: 2015 (54.4%)<br>18-40 yrs.: 207/861<br>40-60 yrs.: 539/1173<br>>60 yrs.: 1269/1669                                         | Hospitalization OR (95% CI)<br>18-40 yrs.: Reference<br>40-60 yrs.: 2.69 (2.21-3.26)<br>>60 yrs.: 10.02 (8.27-12.15) | Hospitalization OR (95% CI)<br>18-40 yrs.: Reference<br>40-60 yrs.: 2.02 (1.62-2.50)<br>>60 yrs.: 5.47 (4.29-6.96)                                                    |
| ICU: intensive care unit; COPD: chronic obstructive pulmonary disease; BMI: body mass index; yrs.: years; SOFA score: sequential organ failure assessment score; OR: odds ratio; HR: hazards ratio; CI: confidence intervals; NA: not available |                                                                                                                                                                                                                                                                                                                                                                                             |                                           |                                                                                                                                                     |                                                                                                                      |                                                                                                                                                                       |

Table S8. Risk of bias summary for studies investigating hospitalization

| Study                           | Major domains         |                     |                               |             |                 | Minor domains |         |                      | OVERALL |
|---------------------------------|-----------------------|---------------------|-------------------------------|-------------|-----------------|---------------|---------|----------------------|---------|
|                                 | Recruitment procedure | Exposure assessment | Outcome source and validation | Confounding | Analysis method | Chronology    | Funding | Conflict of interest |         |
| Azar et al. 2020 (167)          | ✓                     | ✓                   | ✓                             | ✗           | ✓               | ✓             | ⚠       | ⚠                    | ✗       |
| Burn et al. 2020 (177)          | ✓                     | ✓                   | ✓                             | ✓           | ✓               | ✓             | ✓       | ✗                    | ✓       |
| Carrillo-Vega et al. 2020 (180) | ✓                     | ✗                   | ✓                             | ✗           | ✓               | ✓             | ✓       | ✓                    | ✗       |
| Cchiba and Patel 2020 (186)     | ✓                     | ✗                   | ✓                             | ✗           | ✓               | ✓             | ✓       | ✓                    | ✗       |
| Ebinger et al. 2020 (201)       | ✓                     | ✓                   | ✓                             | ✓           | ✓               | ✓             | ✓       | ✓                    | ✓       |
| Giannouchos et al. 2020 (210)   | ✗                     | ✗                   | ✓                             | ✗           | ✓               | ✓             | ✓       | ✓                    | ✗       |
| Gu et al. 2020 (215)            | ✓                     | ✓                   | ✓                             | ✓           | ✓               | ✓             | ✓       | ✗                    | ✓       |
| Killerby et al. 2020 (230)      | ✗                     | ✗                   | ✓                             | ✗           | ✓               | ✓             | ⚠       | ✗                    | ✗       |
| Merzon et al. 2020 (249)        | ✓                     | ✓                   | ✓                             | ✗           | ✓               | ✓             | ✓       | ✓                    | ✗       |
| Petrilli et al. 2020 (263)      | ✓                     | ✓                   | ✓                             | ✗           | ✓               | ✓             | ✓       | ✓                    | ✗       |
| Price-Haywood et al. 2020 (266) | ✓                     | ✓                   | ✓                             | ✓           | ✓               | ✓             | ✓       | ✗                    | ✓       |
| Reiley et al. 2020 (269)        | ✓                     | ✓                   | ✓                             | ✗           | ✓               | ✓             | ⚠       | ✗                    | ✗       |
| Rentsch et al. 2020 (270)       | ✓                     | ✓                   | ✓                             | ✗           | ✓               | ✗             | ✓       | ✓                    | ✗       |
| Rossi et al. 2020 (274)         | ✗                     | ✓                   | ✓                             | ✗           | ✓               | ✓             | ✓       | ✓                    | ✗       |
| Soares et al. 2020 (293)        | ✓                     | ✗                   | ✓                             | ✗           | ✓               | ✗             | ✓       | ✓                    | ✗       |
| van Gerwen et al. 2020 (301)    | ✓                     | ✗                   | ✓                             | ✗           | ✓               | ✓             | ✓       | ✓                    | ✗       |

 = low risk of bias  = unclear risk of bias  = high risk of bias

**Figure S8. Relationship between median age and log of relative risk among studies using age as a categorical value (linear and cubic models, variance weighted): hospitalization**

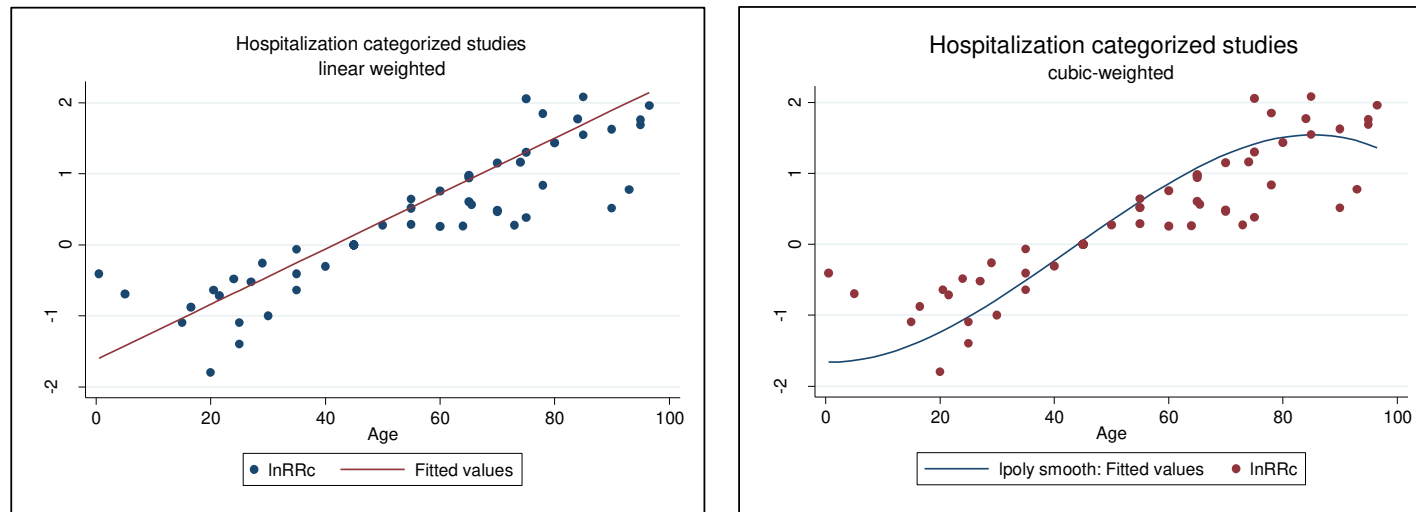

**Figure S9. Funnel plot for studies investigating risk of hospitalization**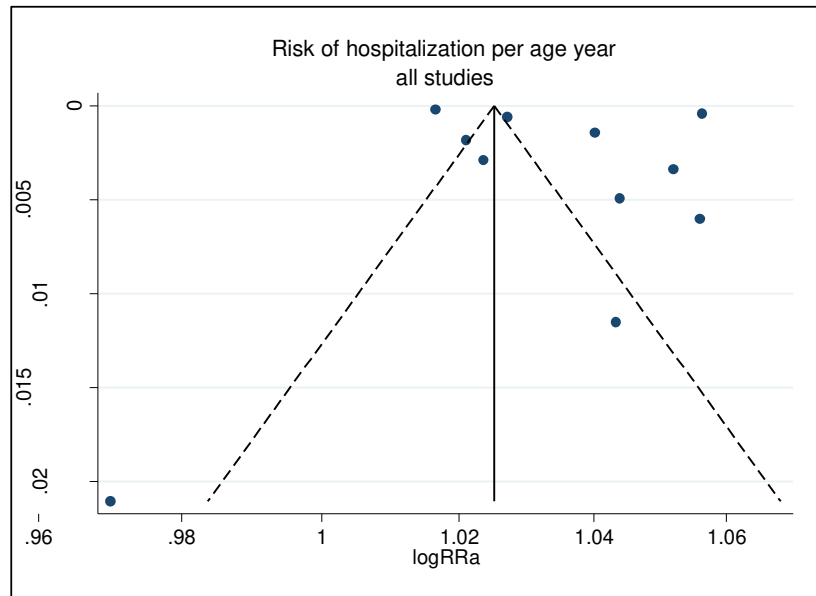

Table S9. Results of studies investigating admission to ICU

| Author, Year (Ref)            | Confounders and age-dependent risk factors used in the model                                                                                                                                                                                                                                                                                                                                      | Type of analysis                                             | N in analysis<br>Total ICU admissions<br>In age group: # cases/total                                                                                   | Results<br>Unadjusted effect estimates (if available)                                                                                                                                                                                                                                                        | Results<br>Adjusted effect estimates                                                                                                                                                                                                                                                                                        |
|-------------------------------|---------------------------------------------------------------------------------------------------------------------------------------------------------------------------------------------------------------------------------------------------------------------------------------------------------------------------------------------------------------------------------------------------|--------------------------------------------------------------|--------------------------------------------------------------------------------------------------------------------------------------------------------|--------------------------------------------------------------------------------------------------------------------------------------------------------------------------------------------------------------------------------------------------------------------------------------------------------------|-----------------------------------------------------------------------------------------------------------------------------------------------------------------------------------------------------------------------------------------------------------------------------------------------------------------------------|
| Argenziano 2020 (166)         | Sex, BMI, smoking, coronary artery disease, congestive heart failure, history of stroke, diabetes mellitus, hypertension, cirrhosis, HIV, inflammatory bowel disease, pulmonary disease, renal disease, viral hepatitis, active malignancy, transplant history, rheumatological disease, immunosuppressed state, no comorbidities                                                                 | Cox proportional hazards analysis only with complete data    | N= 841<br>ICU patients: 236 (24%)                                                                                                                      | NA                                                                                                                                                                                                                                                                                                           | ICU HR (95% CI)<br>Age (per year): 0.996 (0.985-1.01)                                                                                                                                                                                                                                                                       |
| Bi, Hong, and Meng 2020 (173) | Sex, hypertension, diabetes, coronary heart disease, chronic lung disease, cerebrovascular disease, total comorbidity, fever, cough, shortness of breath, muscle soreness, fatigue, PaO <sub>2</sub> /FiO <sub>2</sub> , lymphocyte count, platelet count, C-reactive protein, D-dimer                                                                                                            | Competing risk regressions                                   | N= 420<br>ICU admissions: 19<br><39yrs.: 1/163<br>40-59 yrs.: 4/149<br>60+ yrs.: 14/108                                                                | NA                                                                                                                                                                                                                                                                                                           | Risk of ICU admission HR (95% CI)<br><br>0-39 yrs.: Reference<br>40-59 yrs.: 4.4 (0.5-39.6)<br>60+ yrs.: 22.4 (3.0-168.2)                                                                                                                                                                                                   |
| Du 2020 (199)                 | Number of comorbidities (0, 1, ≥2), highest temperature, lymphocyte Count, detection of SARS-CoV-2<br>Comorbidities considered in number of comorbidities: hypertension, diabetes, cardiovascular/cerebrovascular disease, chronic digestive disease, pre-existing pulmonary tuberculosis, chronic liver/kidney disease, chronic obstructive lung disease, peripheral artery disease, malignancy) | Ordinal logit regression                                     | N= 179<br>Mild-to-moderate: 79 (44.2%)<br>Severe: 57 (31.8%)<br>Critically ill (ICU admission): 43 (24%)                                               | NA                                                                                                                                                                                                                                                                                                           | Disease severity ( <i>calculated ORs don't allow us to compare to other studies on ICU admission</i> )<br>OR (95% CI)<br><60 yrs.: Reference<br>60-69 yrs.: 1.58 (1.06-2.37)<br>≥70 yrs.: 1.69 (1.06-2.68)                                                                                                                  |
| Gu 2020 (215)                 | Sex, BMI, smoking status, alcohol consumption, race/ethnicity, neighborhood socioeconomic disadvantage index, population density, comorbidity score, respiratory disease, circulatory disease, any cancer, type 2 diabetes, kidney disease, liver disease, autoimmune disease                                                                                                                     | Logistic regression analyses, firth bias-corrected estimates | N= 756<br>ICU: 141<br><18 yrs.: 3/9<br>18- <35 yrs.: 26/203<br>35- <50 yrs.: 36/257<br>50- <65 yrs.: 96/346<br>65- <80 yrs.: 91/233<br>≥80 yrs.: 31/88 | ICU OR (95% CI)<br>Age (per 10 years): 1.37 (1.26-1.49)<br>Per yr. increase (own calculations): 1.03 (1.02-1.04)<br><18 yrs.: 3.61 (0.86-15.1)<br>18- <35 yrs.: Reference<br>35- <50 yrs.: 1.10 (0.64-1.89)<br>50- <65 yrs.: 2.55 (1.59-4.09)<br>65- <80 yrs.: 4.39 (2.7-7.15)<br>≥80 yrs.: 3.87 (2.12-7.07) | Population-based ICU OR (95% CI)<br>Age (per 10 years): 1.45 (1.27-1.65)<br>Per yr. increase (own calculations) 1.04 (1.02-1.05)<br><18 yrs.: 3.67 (0.45-30)<br>18- <35 yrs.: Reference<br>35- <50 yrs.: 1.33 (0.57-3.11)<br>50- <65 yrs.: 2.96 (1.39-6.33)<br>65- <80 yrs.: 4.44 (2.01-9.82)<br>≥80 yrs.: 7.70 (3.10-19.1) |

| Author, Year (Ref)       | Confounders and age-dependent risk factors used in the model                                                                                                                                                                                                                                                                                                                          | Type of analysis                                                                                                               | N in analysis<br>Total ICU admissions<br>In age group: # cases/total                                                                                                  | Results<br>Unadjusted effect estimates (if available)                                                                                                                                                  | Results<br>Adjusted effect estimates                                                                                                                                                                                    |
|--------------------------|---------------------------------------------------------------------------------------------------------------------------------------------------------------------------------------------------------------------------------------------------------------------------------------------------------------------------------------------------------------------------------------|--------------------------------------------------------------------------------------------------------------------------------|-----------------------------------------------------------------------------------------------------------------------------------------------------------------------|--------------------------------------------------------------------------------------------------------------------------------------------------------------------------------------------------------|-------------------------------------------------------------------------------------------------------------------------------------------------------------------------------------------------------------------------|
| Hashemi 2020 (220)       | Chronic liver disease, obesity, sex, cardiac diseases, hypertension, diabetes, hyperlipidaemia, pulmonary disorders                                                                                                                                                                                                                                                                   | Logistic regression                                                                                                            | N= 363<br>ICU: NA                                                                                                                                                     | NA                                                                                                                                                                                                     | In-hospital ICU admission<br>OR (95% CI)<br>Age (per year): 1.01 (0.99-1.02)                                                                                                                                            |
| Kalligeros 2020 (228)    | Ethnicity/race, sex, BMI, diabetes, hypertension, heart disease, lung disease                                                                                                                                                                                                                                                                                                         | Logistic regression                                                                                                            | N= 103<br>ICU admission: 41 (39.8%)                                                                                                                                   | In-hospital ICU-admission<br>OR (95% CI)<br>Age (per year): 1.02 (1.00-1.05)                                                                                                                           | In-hospital ICU-admission<br>OR (95% CI)<br>Age (per year): 1.03 (1.00-1.07)                                                                                                                                            |
| Kim 2020 (231)           | Sex, race, ethnicity, smoker, hypertension, obesity, diabetes, chronic lung disease, cardiovascular disease, neurologic, renal, immunosuppression, gastrointestinal or liver, hematologic, rheumatologic or autoimmune, outpatient ACE-inhibitor use, angiotensin receptor blocker use prior to hospitalization                                                                       | Log-linked Poisson generalized estimating equation regressions with an exchangeable correlation matrix                         | N=2490<br>ICU admissions: 798 (32.0%)<br>18-39 yrs.: 8/302<br>40-49 yrs.: 91/318<br>50-64 yrs.: 32/744<br>65-74 yrs.: 23/478<br>75-84 yrs.: 19/397<br>≥85 yrs.: 8/251 | ICU RR (95% CI)<br>18-39 yrs.: Reference<br>40-49 yrs.: 1.38 (1.08-1.75)<br>50-64 yrs.: 1.64 (1.36-1.99)<br>65-74 yrs.: 1.80 (1.50-2.16)<br>75-84 yrs.: 1.80 (1.52-2.14)<br>≥85 yrs.: 1.16 (0.87-1.54) | ICU RR (95% CI)<br>18-39 yrs.: Reference<br>40-49 yrs.: 1.22 (0.96-1.56)<br>50-64 yrs.: 1.53 (1.28-1.83)<br>65-74 yrs.: 1.65 (1.34-2.03)<br>75-84 yrs.: 1.84 (1.60-2.11)<br>≥85 yrs.: 1.43 (1.00-2.04)                  |
| Price-Haywood 2020 (266) | Race, sex, Charlson Index, obesity                                                                                                                                                                                                                                                                                                                                                    | In-hospital ICU: Cox proportional-hazards models<br>For variables for which less than 25% of data missing, values were imputed | N= 1382<br>ICU: 474 (34.3%)                                                                                                                                           | ICU: OR (95% CI)<br>Adjusted for race and sex:<br>Per 5-yr. unit increase:<br>0.99 (0.96-1.02)                                                                                                         | ICU: OR (95% CI)<br>Fully adjusted:<br>Per 5-yr. unit increase: 1.01 (0.98-1.05)<br><br>Per yr.- unit increase (own calculations):<br>1.002 (0.996-1.010)                                                               |
| Rentsch 2020 (270)       | Adjusted model 1:<br>Race, baseline comorbidities (chronic kidney disease, COPD, diabetes, hypertension, vascular disease), Medication history in year prior to test date (angiotensin converting enzyme inhibitor or angiotensin II receptor blocker, nonsteroidal anti-inflammatory drug), vital signs (systolic blood pressure, oxygen saturation, pulse, temperature), laboratory | Logistic regression                                                                                                            | N= 585<br>ICU: 122 (20.9%)<br>54-59 yrs.: 11/135<br>60-64 yrs.: 24/135<br>65-69 yrs.: 28/120<br>70-75 yrs.: 59/195                                                    | Hospitalization: OR (95% CI)<br>Per 5-yr. increase: 1.55 (1.30-1.86)<br>Per yr. increase: 1.09 (1.05-1.13)                                                                                             | Hospitalization: OR (95% CI)<br><br>Model 1:<br>Per 5-yr. increase: 1.31 (1.03-1.66)<br>Per yr. increase: 1.06 (1.01-1.11)<br><br>Model 2:<br>Per 5-yr. increase: 0.98 (0.76-1.26)<br>Per yr. increase: 1.0 (0.95-1.05) |

| Author, Year (Ref)                                                                                                                                                                                                                              | Confounders and age-dependent risk factors used in the model                                                                                                                                                                                                                                                                                                                                                                                                                             | Type of analysis    | N in analysis<br>Total ICU admissions<br>In age group: # cases/total                                           | Results<br>Unadjusted effect estimates (if available)                                                                                                  | Results<br>Adjusted effect estimates                                                                                                                   |
|-------------------------------------------------------------------------------------------------------------------------------------------------------------------------------------------------------------------------------------------------|------------------------------------------------------------------------------------------------------------------------------------------------------------------------------------------------------------------------------------------------------------------------------------------------------------------------------------------------------------------------------------------------------------------------------------------------------------------------------------------|---------------------|----------------------------------------------------------------------------------------------------------------|--------------------------------------------------------------------------------------------------------------------------------------------------------|--------------------------------------------------------------------------------------------------------------------------------------------------------|
|                                                                                                                                                                                                                                                 | findings (albumin, eGFR, FIB-4, Hemoglobin, White blood cell count, Lymphocyte count)<br><br>Adjusted model 2:<br>Race, baseline comorbidities (chronic kidney disease, COPD, diabetes, hypertension, vascular disease), Medication history in year prior to test date (angiotensin converting enzyme inhibitor or angiotensin II receptor blocker, nonsteroidal anti-inflammatory drug), vital signs (systolic blood pressure, oxygen saturation, pulse, temperature), VACS Index score |                     |                                                                                                                |                                                                                                                                                        |                                                                                                                                                        |
| Seigle 2020 USA (280)                                                                                                                                                                                                                           | BMI, sex, race/ethnicity, diabetes, coronary artery disease or myocardial infarction, chronic heart failure, hypertension, COPD/asthma, active cancer, liver disease, renal disease                                                                                                                                                                                                                                                                                                      | Logistic regression | N = 436<br>ICU: 156 (34.7%)<br><50 yrs.: NA/104<br>50-59 yrs.: NA/81<br>60-69 yrs.: NA/82<br>≥70 yrs.: NA /181 | 14-day ICU admission OR (95% CIs)<br><50 yrs.: Reference<br>50-59 yrs.: 1.37 (0.75-2.49)<br>60-69 yrs.: 1.05 (0.57-1.93)<br>≥70 yrs.: 0.87 (0.89-1.96) | 14-day ICU admission OR (95% CIs)<br><50 yrs.: Reference<br>50-59 yrs.: 1.13 (0.57-2.24)<br>60-69 yrs.: 1.22 (0.60-2.49)<br>≥70 yrs.: 1.41 (1.20-3.88) |
| Suleyman 2020 (296)                                                                                                                                                                                                                             | For ICU:<br>Sex, race, severe obesity, chronic kidney disease, cancer, diabetes, hypertension, coronary artery disease                                                                                                                                                                                                                                                                                                                                                                   | Logistic regression | N= 463<br>ICU: 141 (39.7%)<br>≤60 yrs.: 49/245<br>>60 yrs.: 92/218                                             | NA                                                                                                                                                     | ICU OR (95% CI)<br>≤60 yrs.: Reference<br>>60 yrs.: 1.6 (1.0Bi-2.7)                                                                                    |
| Tai 2020 (299)                                                                                                                                                                                                                                  | Model 2:<br>Cardiovascular conditions, sex, chest tightness, diabetes mellitus, lung diseases                                                                                                                                                                                                                                                                                                                                                                                            | Logistic regression | N= 332<br>ICU: 58 (17.5%)                                                                                      | ICU OR (95% CI)<br>Age (per year): 1.006 (0.983-1.030)                                                                                                 | ICU OR (95% CI)<br>Model 2<br>Age (per year): 0.993 (0.966-1.020)                                                                                      |
| ICU: intensive care unit; COPD: chronic obstructive pulmonary disease; BMI: body mass index; yrs.: years; SOFA score: sequential organ failure assessment score; OR: odds ratio; HR: hazards ratio; CI: confidence intervals; NA: not available |                                                                                                                                                                                                                                                                                                                                                                                                                                                                                          |                     |                                                                                                                |                                                                                                                                                        |                                                                                                                                                        |



Table S10. Risk of bias summary for studies investigating risk of admission to ICU for hospitalized patients

| Study                                | Major domains         |                     |                               |             |                 | Minor domains |         |                      | OVERALL |
|--------------------------------------|-----------------------|---------------------|-------------------------------|-------------|-----------------|---------------|---------|----------------------|---------|
|                                      | Recruitment procedure | Exposure assessment | Outcome source and validation | Confounding | Analysis method | Chronology    | Funding | Conflict of interest |         |
| Argenziano et al. 2020 (166)         | ✓                     | ✓                   | ✓                             | ✓           | ✓               | ✓             | ✓       | ✗                    | ✓       |
| Bi, Hong, and Meng et al. 2020 (173) | ✓                     | ✗                   | ✓                             | ⚠           | ✓               | ✗             | ⚠       | ✓                    | ✗       |
| Du et al. 2020 (199)                 | ✓                     | ✗                   | ✓                             | ⚠           | ✓               | ✗             | ⚠       | ✓                    | ✗       |
| Gu et al. 2020* (215)                | ✓                     | ✓                   | ✓                             | ✓           | ✓               | ✓             | ✓       | ✗                    | ✓       |
| Hashemi et al. 2020 (220)            | ✓                     | ✓                   | ✓                             | ✗           | ✓               | ✓             | ✓       | ✓                    | ✗       |
| Kalligeros et al. 2020 (228)         | ✓                     | ✓                   | ✓                             | ✗           | ✓               | ✓             | ⚠       | ✓                    | ✗       |
| Kim et al. 2020 (231)                | ✓                     | ✓                   | ✓                             | ✓           | ✓               | ✓             | ✓       | ✗                    | ✓       |
| Price-Haywood et al. 2020 (266)      | ✓                     | ✓                   | ✓                             | ✓           | ✓               | ✓             | ✓       | ✗                    | ✓       |
| Rentsch et al. 2020 (270)            | ✓                     | ✓                   | ✓                             | ✗           | ✓               | ✗             | ✓       | ✓                    | ✗       |
| Siegler et al. 2020 (280)            | ✓                     | ✗                   | ✓                             | ✓           | ✓               | ✓             | ✓       | ✗                    | ✗       |
| Suleyman et al. 2020 (296)           | ✓                     | ✗                   | ✓                             | ✗           | ✓               | ✓             | ⚠       | ✓                    | ✗       |
| Tai et al. 2020 (299)                | ✗                     | ✓                   | ✓                             | ✗           | ✓               | ✓             | ✓       | ✓                    | ✗       |

\*Positive test-based ICU    ✓ = low risk of bias    ⚠ = unclear risk of bias    ✗ = high risk of bias

**Table S11. Results of studies investigating risk of mechanical ventilation**

| Author, Year (Ref)        | Confounders and age-dependent risk factors used in the model                                                                                                                        | Type of analysis # cases / # non-cases                                                                     | N in analysis Total mechanical ventilation In age group: # cases/total                                                                                          | Results Unadjusted effect estimates (if available)                                                                                                              | Results Adjusted effect estimates                                                                                                                                                                                              |
|---------------------------|-------------------------------------------------------------------------------------------------------------------------------------------------------------------------------------|------------------------------------------------------------------------------------------------------------|-----------------------------------------------------------------------------------------------------------------------------------------------------------------|-----------------------------------------------------------------------------------------------------------------------------------------------------------------|--------------------------------------------------------------------------------------------------------------------------------------------------------------------------------------------------------------------------------|
| Costa Monteiro 2020 (191) | Sex, race, obesity, diabetes, hypertension, coronary artery disease, chronic kidney disease, smoking                                                                                | Multivariable logistic regression<br>Past medical history with cohort prevalence of >15% used in the model | N=112<br><br>Mechanical ventilation: 28 (25%)                                                                                                                   | NA                                                                                                                                                              | Mechanical ventilation OR (95% CI)<br>Per year: 0.99 (0.96-1.03)                                                                                                                                                               |
| Hashemi 2020 (220)        | Chronic liver disease, obesity, sex, cardiac diseases, hypertension, diabetes, hyperlipidaemia, pulmonary disorders                                                                 | Logistic regression                                                                                        | N=363<br>Mechanical ventilation: NA                                                                                                                             | NA                                                                                                                                                              | In-hospital mechanical ventilation OR (95% CI)<br>Age (per year): 1.01 (0.99-1.03)                                                                                                                                             |
| Kalligeros 2020 (228)     | Ethnicity/race, sex, BMI, diabetes, hypertension, heart disease, lung disease                                                                                                       | Logistic regression                                                                                        | N= 103<br>Mechanical ventilation: 29 (28.2%)                                                                                                                    | Mechanical ventilation OR (95% CI)<br>Age (per year): 1.01 (0.98-1.04)                                                                                          | Mechanical ventilation OR (95% CI)<br>Age (per year): 1.02 (0.98-1.06)                                                                                                                                                         |
| Patel† 2020 (261)         | Therapeutic anticoagulation, home antiplatelet, race, BMI, Charlson score, glucose level                                                                                            | Poisson regression model and logistic regression                                                           | N= 1716<br>Mechanical ventilation= 254 (14.8%)<br><br>18-44 yrs.: NA/379<br>45- 59 yrs.: NA/508<br>60-69 yrs.: NA/371<br>70-79 yrs.: NA/242<br>>80 yrs.: NA/216 | NA                                                                                                                                                              | Mechanical ventilation<br>18-44 yrs.: OR= 1.16 (95% CI: 0.71-1.92)<br>45- 59 yrs.: Reference<br>60-69 yrs.: OR= 1.24 (95% CI: 0.79-1.94)<br>70-79 yrs.: OR= 0.89 (95% CI: 0.51-1.54)<br>>80 yrs.: OR= 0.42 (95% CI: 0.21-0.84) |
| Seiglie 2020 (280)        | BMI, sex, race/ethnicity, diabetes, coronary artery disease or myocardial infarction, chronic heart failure, hypertension, COPD/asthma, active cancer, liver disease, renal disease | Logistic regression                                                                                        | N= 436<br>Intubations: 129 (29.7%)<br><50 yrs.: NA/104<br>50-59 yrs.: NA/82<br>60-69 yrs.: NA/82<br>≥70 yrs.: 181                                               | 14-day mechanical ventilation OR (95% CIs)<br><50 yrs.: Reference<br>50-59 yrs.: 1.11 (0.59-2.09)<br>60-69 yrs.: 0.99 (0.53-1.87)<br>≥70 yrs.: 0.85 (0.50-1.45) | 14-day mechanical ventilation OR (95% CIs)<br><50 yrs.: Reference<br>50-59 yrs.: 1.02 (0.50-2.08)<br>60-69 yrs.: 1.20 (0.57-2.54)<br>≥70 yrs.: 1.72 (0.82-3.61)                                                                |
| Suleyman 2020 (296)       | For mechanical ventilation:<br>Sex, race, severe obesity, chronic kidney disease, cancer, diabetes,                                                                                 | Logistic regression                                                                                        | N= 355<br>Mechanical ventilation: 114 (32.1%)                                                                                                                   | NA                                                                                                                                                              | Mechanical ventilation OR (95% CI)<br>≤60 yrs.: Reference<br>>60 yrs.: 3.5 (1.9-6.4)                                                                                                                                           |

| Author, Year (Ref)                                                                                                                                                                                                                              | Confounders and age-dependent risk factors used in the model                                                                                                                                                                                                                                                       | Type of analysis # cases / # non-cases | N in analysis Total mechanical ventilation In age group: # cases/total                                                             | Results Unadjusted effect estimates (if available)                                                                        | Results Adjusted effect estimates                                                                                         |
|-------------------------------------------------------------------------------------------------------------------------------------------------------------------------------------------------------------------------------------------------|--------------------------------------------------------------------------------------------------------------------------------------------------------------------------------------------------------------------------------------------------------------------------------------------------------------------|----------------------------------------|------------------------------------------------------------------------------------------------------------------------------------|---------------------------------------------------------------------------------------------------------------------------|---------------------------------------------------------------------------------------------------------------------------|
|                                                                                                                                                                                                                                                 | hypertension, coronary artery disease, congestive heart failure, tobacco use                                                                                                                                                                                                                                       |                                        | ≤60 yrs.: NA/153<br>>60 yrs.: NA/202                                                                                               |                                                                                                                           |                                                                                                                           |
| van Gerwen 2020 (301)                                                                                                                                                                                                                           | Sex, race, smoking, BMI, hypertension, coronary artery disease, atrial fibrillation, congestive heart failure, peripheral vascular disease, cerebrovascular accident/transient ischemic attack, dementia, diabetes, hypothyroidism, chronic kidney disease, malignancy, asthma, COPD, prior venous thromboembolism | Logistic regression                    | N=2015<br>Mechanical ventilation: 525 (26% of hospitalized)<br><br>18-40 yrs.: 29/207<br>40-60 yrs.: 135/539<br>>60 yrs.: 361/1269 | Mechanical ventilation OR (95% CI)<br>18-40 yrs.: Reference<br>40-60 yrs.: 2.05 (1.32-3.18)<br>>60 yrs.: 2.44 (1.62-3.68) | Mechanical ventilation OR (95% CI)<br>18-40 yrs.: Reference<br>40-60 yrs.: 2.12 (1.35-3.32)<br>>60 yrs.: 3.26 (2.08-5.11) |
| ICU: intensive care unit; COPD: chronic obstructive pulmonary disease; BMI: body mass index; yrs.: years; SOFA score: sequential organ failure assessment score; OR: odds ratio; HR: hazards ratio; CI: confidence intervals; NA: not available |                                                                                                                                                                                                                                                                                                                    |                                        |                                                                                                                                    |                                                                                                                           |                                                                                                                           |

**Table S12. Risk of bias summary for studies investigating risk of mechanical ventilation**

| Study                            | Major domains         |                     |                               |             |                 | Minor domains |         |                      | OVERALL |
|----------------------------------|-----------------------|---------------------|-------------------------------|-------------|-----------------|---------------|---------|----------------------|---------|
|                                  | Recruitment procedure | Exposure assessment | Outcome source and validation | Confounding | Analysis method | Chronology    | Funding | Conflict of interest |         |
| Costa Monteiro et al. 2020 (191) | ✓                     | ✓                   | ✓                             | ✗           | ✓               | ✓             | ✗       | ✓                    | ✗       |
| Hashemi et al. 2020 (220)        | ✓                     | ✓                   | ✓                             | ✗           | ✓               | ✓             | ✓       | ✓                    | ✗       |
| Kalligeros et al. 2020 (228)     | ✓                     | ✓                   | ✓                             | ✗           | ✓               | ✓             | ⚠       | ✓                    | ✗       |
| Patel et al. 2020 (261)          | ⚠                     | ✓                   | ✓                             | ✓           | ✓               | ✗             | ✓       | ✓                    | ✗       |
| Seiglie et al. 2020 (280)        | ✓                     | ✗                   | ✓                             | ✓           | ✓               | ✓             | ✓       | ✗                    | ✗       |
| Suleyman et al. 2020 (296)       | ✓                     | ✗                   | ✓                             | ✗           | ✓               | ✓             | ⚠       | ✓                    | ✗       |
| van Gerwen et al. 2020 (301)     | ✓                     | ✗                   | ✓                             | ✗           | ✓               | ✓             | ✓       | ✓                    | ✗       |
